# Supplementary material
Source: publisher figshare collection journal article supplement (https://acs.figshare.com/ndownloader/files/4006564)
Supplement: Supplementary file 1 [file 4006564]

 
data_(L5H)(BF4)
  
_audit_creation_method            SHELXL-97 
_chemical_name_systematic 
; 
 ? 
; 
_chemical_name_common             ? 
_chemical_melting_point           ? 
_chemical_formula_moiety          ? 
_chemical_formula_sum 
 'C21 H26 B F4 N2 P' 
_chemical_formula_weight          424.22 
  
loop_ 
 _atom_type_symbol 
 _atom_type_description 
 _atom_type_scat_dispersion_real 
 _atom_type_scat_dispersion_imag 
 _atom_type_scat_source 
 'C'  'C'   0.0033   0.0016 
 'International Tables Vol C Tables 4.2.6.8 and 6.1.1.4' 
 'H'  'H'   0.0000   0.0000 
 'International Tables Vol C Tables 4.2.6.8 and 6.1.1.4' 
 'B'  'B'   0.0013   0.0007 
 'International Tables Vol C Tables 4.2.6.8 and 6.1.1.4' 
 'N'  'N'   0.0061   0.0033 
 'International Tables Vol C Tables 4.2.6.8 and 6.1.1.4' 
 'F'  'F'   0.0171   0.0103 
 'International Tables Vol C Tables 4.2.6.8 and 6.1.1.4' 
 'P'  'P'   0.1023   0.0942 
 'International Tables Vol C Tables 4.2.6.8 and 6.1.1.4' 
  
_symmetry_cell_setting            Orthorhombic 
_symmetry_space_group_name_H-M    Fdd2 
  
loop_ 
 _symmetry_equiv_pos_as_xyz 
 'x, y, z' 
 '-x, -y, z' 
 'x+1/4, -y+1/4, z+1/4' 
 '-x+1/4, y+1/4, z+1/4' 
 'x, y+1/2, z+1/2' 
 '-x, -y+1/2, z+1/2' 
 'x+1/4, -y+3/4, z+3/4' 
 '-x+1/4, y+3/4, z+3/4' 
 'x+1/2, y, z+1/2' 
 '-x+1/2, -y, z+1/2' 
 'x+3/4, -y+1/4, z+3/4' 
 '-x+3/4, y+1/4, z+3/4' 
 'x+1/2, y+1/2, z' 
 '-x+1/2, -y+1/2, z' 
 'x+3/4, -y+3/4, z+1/4' 
 '-x+3/4, y+3/4, z+1/4' 
  
_cell_length_a                    17.8056(12) 
_cell_length_b                    61.743(4) 
_cell_length_c                    7.4649(5) 
_cell_angle_alpha                 90.00 
_cell_angle_beta                  90.00 
_cell_angle_gamma                 90.00 
_cell_volume                      8206.6(10) 
_cell_formula_units_Z             16 
_cell_measurement_temperature     100(2) 
_cell_measurement_reflns_used     9858 
_cell_measurement_theta_min       2.38 
_cell_measurement_theta_max       29.88 
  
_exptl_crystal_description        lozenge 
_exptl_crystal_colour             colourless 
_exptl_crystal_size_max           0.37 
_exptl_crystal_size_mid           0.22 
_exptl_crystal_size_min           0.18 
_exptl_crystal_density_meas       ? 
_exptl_crystal_density_diffrn     1.373 
_exptl_crystal_density_method     'not measured' 
_exptl_crystal_F_000              3552 
_exptl_absorpt_coefficient_mu     0.179 
_exptl_absorpt_correction_type    multi-scan 
_exptl_absorpt_correction_T_min   0.9366 
_exptl_absorpt_correction_T_max   0.9684 
_exptl_absorpt_process_details    sadabs 
  
_exptl_special_details 
; 
 ? 
; 
  
_diffrn_ambient_temperature       100(2) 
_diffrn_radiation_wavelength      0.71073 
_diffrn_radiation_type            MoK\a 
_diffrn_radiation_source          'fine-focus sealed tube' 
_diffrn_radiation_monochromator   graphite 
_diffrn_measurement_device_type   'Bruker APEX-II CCD' 
_diffrn_measurement_method        '\f and \w scans' 
_diffrn_detector_area_resol_mean  ? 
_diffrn_reflns_number             58988 
_diffrn_reflns_av_R_equivalents   0.0412 
_diffrn_reflns_av_sigmaI/netI     0.0323 
_diffrn_reflns_limit_h_min        -23 
_diffrn_reflns_limit_h_max        26 
_diffrn_reflns_limit_k_min        -93 
_diffrn_reflns_limit_k_max        89 
_diffrn_reflns_limit_l_min        -11 
_diffrn_reflns_limit_l_max        11 
_diffrn_reflns_theta_min          1.32 
_diffrn_reflns_theta_max          32.58 
_reflns_number_total              7027 
_reflns_number_gt                 6251 
_reflns_threshold_expression      >2sigma(I) 
  
_computing_data_collection        'Bruker APEX2' 
_computing_cell_refinement        'Bruker SAINT' 
_computing_data_reduction         'Bruker SAINT' 
_computing_structure_solution     'SHELXS-97 (Sheldrick, 2008)' 
_computing_structure_refinement   'SHELXL-97 (Sheldrick, 2008)' 
_computing_molecular_graphics     'Bruker SHELXTL' 
_computing_publication_material   'Bruker SHELXTL' 
  
_refine_special_details 
; 
 Refinement of F^2^ against ALL reflections.  The weighted R-factor wR and 
 goodness of fit S are based on F^2^, conventional R-factors R are based 
 on F, with F set to zero for negative F^2^. The threshold expression of 
 F^2^ > 2sigma(F^2^) is used only for calculating R-factors(gt) etc. and is 
 not relevant to the choice of reflections for refinement.  R-factors based 
 on F^2^ are statistically about twice as large as those based on F, and R- 
 factors based on ALL data will be even larger. 
; 
  
_refine_ls_structure_factor_coef  Fsqd 
_refine_ls_matrix_type            full 
_refine_ls_weighting_scheme       calc 
_refine_ls_weighting_details 
 'calc w=1/[\s^2^(Fo^2^)+(0.0460P)^2^+12.9682P] where P=(Fo^2^+2Fc^2^)/3' 
_atom_sites_solution_primary      direct 
_atom_sites_solution_secondary    difmap 
_atom_sites_solution_hydrogens    geom 
_refine_ls_hydrogen_treatment     mixed 
_refine_ls_extinction_method      none 
_refine_ls_extinction_coef        ? 
_refine_ls_abs_structure_details 
 'Flack H D (1983), Acta Cryst. A39, 876-881' 
_refine_ls_abs_structure_Flack    -0.02(7) 
_refine_ls_number_reflns          7027 
_refine_ls_number_parameters      265 
_refine_ls_number_restraints      2 
_refine_ls_R_factor_all           0.0537 
_refine_ls_R_factor_gt            0.0438 
_refine_ls_wR_factor_ref          0.0983 
_refine_ls_wR_factor_gt           0.0942 
_refine_ls_goodness_of_fit_ref    1.051 
_refine_ls_restrained_S_all       1.052 
_refine_ls_shift/su_max           0.001 
_refine_ls_shift/su_mean          0.000 
  
loop_ 
 _atom_site_label 
 _atom_site_type_symbol 
 _atom_site_fract_x 
 _atom_site_fract_y 
 _atom_site_fract_z 
 _atom_site_U_iso_or_equiv 
 _atom_site_adp_type 
 _atom_site_occupancy 
 _atom_site_symmetry_multiplicity 
 _atom_site_calc_flag 
 _atom_site_refinement_flags 
 _atom_site_disorder_assembly 
 _atom_site_disorder_group 
B1 B 0.43158(10) 0.16241(3) 1.3986(3) 0.0179(3) Uani 1 1 d . . . 
P1 P 0.43344(2) 0.036687(6) 0.88985(5) 0.01433(8) Uani 1 1 d . . . 
F1 F 0.38815(7) 0.159366(18) 1.24661(18) 0.0393(3) Uani 1 1 d . . . 
F2 F 0.47423(6) 0.143824(16) 1.43199(15) 0.0277(2) Uani 1 1 d . . . 
F3 F 0.38612(7) 0.16712(2) 1.54392(19) 0.0405(3) Uani 1 1 d . . . 
F4 F 0.48144(6) 0.179746(16) 1.37097(17) 0.0285(2) Uani 1 1 d . . . 
N1 N 0.38622(7) 0.086900(19) 1.11733(18) 0.0138(2) Uani 1 1 d D . . 
H1 H 0.3416(8) 0.0834(3) 1.112(3) 0.017 Uiso 1 1 d D . . 
N2 N 0.51044(7) 0.076769(18) 1.13837(18) 0.0137(2) Uani 1 1 d . . . 
C11 C 0.39240(9) 0.05794(2) 0.7491(2) 0.0149(3) Uani 1 1 d . . . 
C12 C 0.44211(10) 0.07416(3) 0.6910(2) 0.0190(3) Uani 1 1 d . . . 
H12 H 0.4940 0.0730 0.7187 0.023 Uiso 1 1 calc R . . 
C13 C 0.41666(10) 0.09186(3) 0.5937(2) 0.0220(3) Uani 1 1 d . . . 
H13 H 0.4507 0.1030 0.5591 0.026 Uiso 1 1 calc R . . 
C14 C 0.34109(11) 0.09330(3) 0.5470(2) 0.0248(3) Uani 1 1 d . . . 
H14 H 0.3234 0.1054 0.4808 0.030 Uiso 1 1 calc R . . 
C15 C 0.29172(10) 0.07702(3) 0.5974(3) 0.0255(3) Uani 1 1 d . . . 
H15 H 0.2405 0.0778 0.5621 0.031 Uiso 1 1 calc R . . 
C16 C 0.31667(9) 0.05952(3) 0.6996(2) 0.0201(3) Uani 1 1 d . . . 
H16 H 0.2822 0.0486 0.7359 0.024 Uiso 1 1 calc R . . 
C21 C 0.36603(8) 0.01415(2) 0.8851(2) 0.0160(3) Uani 1 1 d . . . 
C22 C 0.29449(11) 0.01403(3) 0.9609(2) 0.0247(4) Uani 1 1 d . . . 
H22 H 0.2753 0.0268 1.0148 0.030 Uiso 1 1 calc R . . 
C23 C 0.25067(12) -0.00481(3) 0.9582(3) 0.0310(4) Uani 1 1 d . . . 
H23 H 0.2021 -0.0048 1.0111 0.037 Uiso 1 1 calc R . . 
C24 C 0.27790(11) -0.02360(3) 0.8784(2) 0.0256(4) Uani 1 1 d . . . 
H24 H 0.2482 -0.0364 0.8782 0.031 Uiso 1 1 calc R . . 
C25 C 0.34815(10) -0.02368(2) 0.7996(3) 0.0247(4) Uani 1 1 d . . . 
H25 H 0.3665 -0.0364 0.7431 0.030 Uiso 1 1 calc R . . 
C26 C 0.39212(9) -0.00489(2) 0.8036(2) 0.0207(3) Uani 1 1 d . . . 
H26 H 0.4405 -0.0050 0.7501 0.025 Uiso 1 1 calc R . . 
C31 C 0.41002(8) 0.04869(2) 1.11683(19) 0.0128(2) Uani 1 1 d . . . 
H31 H 0.3540 0.0498 1.1203 0.015 Uiso 1 1 calc R . . 
C32 C 0.43194(9) 0.03430(2) 1.2788(2) 0.0186(3) Uani 1 1 d . . . 
H32A H 0.4179 0.0422 1.3895 0.022 Uiso 1 1 calc R . . 
H32B H 0.4009 0.0210 1.2741 0.022 Uiso 1 1 calc R . . 
C33 C 0.51389(10) 0.02741(3) 1.2961(2) 0.0231(3) Uani 1 1 d . . . 
H33A H 0.5189 0.0178 1.4018 0.028 Uiso 1 1 calc R . . 
H33B H 0.5279 0.0189 1.1890 0.028 Uiso 1 1 calc R . . 
C34 C 0.56881(9) 0.04619(3) 1.3156(3) 0.0229(3) Uani 1 1 d . . . 
H34A H 0.5541 0.0551 1.4203 0.027 Uiso 1 1 calc R . . 
H34B H 0.6196 0.0403 1.3389 0.027 Uiso 1 1 calc R . . 
C35 C 0.57160(8) 0.06057(2) 1.1507(2) 0.0195(3) Uani 1 1 d . . . 
H35A H 0.6203 0.0683 1.1495 0.023 Uiso 1 1 calc R . . 
H35B H 0.5698 0.0512 1.0429 0.023 Uiso 1 1 calc R . . 
C36 C 0.53350(8) 0.09974(2) 1.1486(2) 0.0183(3) Uani 1 1 d . . . 
H36A H 0.5851 0.1013 1.1008 0.022 Uiso 1 1 calc R . . 
H36B H 0.5339 0.1044 1.2754 0.022 Uiso 1 1 calc R . . 
C37 C 0.48055(9) 0.11403(2) 1.0428(2) 0.0195(3) Uani 1 1 d . . . 
H37A H 0.4845 0.1106 0.9136 0.023 Uiso 1 1 calc R . . 
H37B H 0.4942 0.1294 1.0600 0.023 Uiso 1 1 calc R . . 
C38 C 0.40090(9) 0.11019(2) 1.1065(3) 0.0218(3) Uani 1 1 d . . . 
H38A H 0.3938 0.1169 1.2258 0.026 Uiso 1 1 calc R . . 
H38B H 0.3651 0.1170 1.0222 0.026 Uiso 1 1 calc R . . 
C39 C 0.43831(8) 0.07170(2) 1.12584(19) 0.0118(2) Uani 1 1 d . . . 
  
loop_ 
 _atom_site_aniso_label 
 _atom_site_aniso_U_11 
 _atom_site_aniso_U_22 
 _atom_site_aniso_U_33 
 _atom_site_aniso_U_23 
 _atom_site_aniso_U_13 
 _atom_site_aniso_U_12 
B1 0.0151(7) 0.0150(7) 0.0237(8) -0.0049(7) -0.0061(7) 0.0020(6) 
P1 0.01349(15) 0.01141(14) 0.01807(16) -0.00489(14) 0.00304(14) -0.00173(13) 
F1 0.0472(7) 0.0240(5) 0.0467(7) -0.0086(5) -0.0315(6) 0.0073(5) 
F2 0.0273(5) 0.0189(4) 0.0370(6) 0.0006(4) -0.0114(4) 0.0054(4) 
F3 0.0288(6) 0.0483(7) 0.0443(7) -0.0097(6) 0.0152(5) -0.0013(5) 
F4 0.0205(5) 0.0190(4) 0.0459(7) -0.0004(5) 0.0027(5) -0.0016(4) 
N1 0.0130(5) 0.0099(5) 0.0186(6) -0.0002(4) -0.0016(5) -0.0013(4) 
N2 0.0122(5) 0.0093(5) 0.0198(6) -0.0015(5) -0.0001(5) -0.0024(4) 
C11 0.0184(7) 0.0139(6) 0.0124(6) -0.0039(5) 0.0035(5) -0.0023(5) 
C12 0.0209(7) 0.0235(7) 0.0125(6) -0.0027(5) 0.0031(5) -0.0071(6) 
C13 0.0323(9) 0.0215(7) 0.0121(6) 0.0011(5) 0.0034(6) -0.0093(7) 
C14 0.0344(9) 0.0251(8) 0.0149(7) 0.0031(6) 0.0026(7) 0.0031(7) 
C15 0.0192(7) 0.0307(9) 0.0265(9) 0.0015(7) 0.0020(6) 0.0025(6) 
C16 0.0167(7) 0.0217(7) 0.0219(7) -0.0013(6) 0.0045(6) -0.0040(6) 
C21 0.0204(6) 0.0102(5) 0.0174(6) -0.0022(5) -0.0014(6) -0.0030(5) 
C22 0.0304(9) 0.0216(8) 0.0222(8) -0.0096(6) 0.0090(7) -0.0117(7) 
C23 0.0396(10) 0.0319(9) 0.0214(8) -0.0087(7) 0.0099(8) -0.0210(8) 
C24 0.0420(10) 0.0175(7) 0.0173(7) 0.0027(6) -0.0096(7) -0.0156(6) 
C25 0.0305(9) 0.0102(6) 0.0332(9) -0.0028(6) -0.0174(7) 0.0024(6) 
C26 0.0189(7) 0.0123(6) 0.0308(8) -0.0061(6) -0.0092(6) 0.0020(6) 
C31 0.0131(6) 0.0095(5) 0.0157(6) -0.0020(5) 0.0006(5) -0.0020(5) 
C32 0.0232(8) 0.0143(6) 0.0184(7) 0.0029(5) -0.0027(6) -0.0044(6) 
C33 0.0266(8) 0.0150(7) 0.0278(8) 0.0027(6) -0.0086(7) -0.0015(6) 
C34 0.0211(7) 0.0182(7) 0.0294(8) -0.0002(6) -0.0095(7) -0.0001(6) 
C35 0.0113(6) 0.0179(7) 0.0293(8) -0.0020(6) 0.0001(6) 0.0018(5) 
C36 0.0185(6) 0.0113(6) 0.0250(7) -0.0030(6) -0.0009(6) -0.0060(5) 
C37 0.0282(8) 0.0118(6) 0.0186(7) 0.0012(5) 0.0001(6) -0.0055(6) 
C38 0.0237(7) 0.0081(6) 0.0335(9) 0.0017(6) -0.0029(7) 0.0004(5) 
C39 0.0139(6) 0.0107(5) 0.0109(6) -0.0011(5) 0.0001(5) -0.0018(5) 
  
_geom_special_details 
; 
 All esds (except the esd in the dihedral angle between two l.s. planes) 
 are estimated using the full covariance matrix.  The cell esds are taken 
 into account individually in the estimation of esds in distances, angles 
 and torsion angles; correlations between esds in cell parameters are only 
 used when they are defined by crystal symmetry.  An approximate (isotropic) 
 treatment of cell esds is used for estimating esds involving l.s. planes. 
; 
  
loop_ 
 _geom_bond_atom_site_label_1 
 _geom_bond_atom_site_label_2 
 _geom_bond_distance 
 _geom_bond_site_symmetry_2 
 _geom_bond_publ_flag 
B1 F3 1.384(2) . ? 
B1 F1 1.386(2) . ? 
B1 F2 1.3982(19) . ? 
B1 F4 1.4061(19) . ? 
P1 C11 1.8328(16) . ? 
P1 C21 1.8378(14) . ? 
P1 C31 1.8957(14) . ? 
N1 C39 1.3211(18) . ? 
N1 C38 1.4638(18) . ? 
N2 C39 1.3254(17) . ? 
N2 C36 1.4784(17) . ? 
N2 C35 1.4813(18) . ? 
C11 C16 1.401(2) . ? 
C11 C12 1.405(2) . ? 
C12 C13 1.388(2) . ? 
C13 C14 1.393(3) . ? 
C14 C15 1.387(2) . ? 
C15 C16 1.395(2) . ? 
C21 C22 1.394(2) . ? 
C21 C26 1.403(2) . ? 
C22 C23 1.401(2) . ? 
C23 C24 1.391(3) . ? 
C24 C25 1.382(3) . ? 
C25 C26 1.400(2) . ? 
C31 C39 1.5089(18) . ? 
C31 C32 1.550(2) . ? 
C32 C33 1.525(2) . ? 
C33 C34 1.524(2) . ? 
C34 C35 1.518(2) . ? 
C36 C37 1.514(2) . ? 
C37 C38 1.514(2) . ? 
  
loop_ 
 _geom_angle_atom_site_label_1 
 _geom_angle_atom_site_label_2 
 _geom_angle_atom_site_label_3 
 _geom_angle 
 _geom_angle_site_symmetry_1 
 _geom_angle_site_symmetry_3 
 _geom_angle_publ_flag 
F3 B1 F1 110.10(14) . . ? 
F3 B1 F2 110.52(16) . . ? 
F1 B1 F2 109.74(13) . . ? 
F3 B1 F4 108.92(13) . . ? 
F1 B1 F4 109.59(16) . . ? 
F2 B1 F4 107.94(13) . . ? 
C11 P1 C21 105.69(7) . . ? 
C11 P1 C31 98.34(6) . . ? 
C21 P1 C31 99.76(7) . . ? 
C39 N1 C38 125.11(12) . . ? 
C39 N2 C36 119.96(12) . . ? 
C39 N2 C35 123.87(11) . . ? 
C36 N2 C35 116.12(11) . . ? 
C16 C11 C12 118.36(14) . . ? 
C16 C11 P1 125.78(12) . . ? 
C12 C11 P1 115.84(12) . . ? 
C13 C12 C11 121.12(16) . . ? 
C12 C13 C14 119.77(15) . . ? 
C15 C14 C13 119.87(16) . . ? 
C14 C15 C16 120.50(16) . . ? 
C15 C16 C11 120.30(15) . . ? 
C22 C21 C26 118.29(14) . . ? 
C22 C21 P1 126.39(11) . . ? 
C26 C21 P1 115.25(12) . . ? 
C21 C22 C23 120.52(16) . . ? 
C24 C23 C22 120.30(18) . . ? 
C25 C24 C23 120.03(15) . . ? 
C24 C25 C26 119.60(15) . . ? 
C25 C26 C21 121.24(16) . . ? 
C39 C31 C32 114.88(12) . . ? 
C39 C31 P1 109.54(10) . . ? 
C32 C31 P1 114.69(10) . . ? 
C33 C32 C31 117.83(14) . . ? 
C34 C33 C32 114.18(13) . . ? 
C35 C34 C33 112.88(14) . . ? 
N2 C35 C34 114.90(14) . . ? 
N2 C36 C37 111.05(12) . . ? 
C36 C37 C38 109.16(13) . . ? 
N1 C38 C37 109.78(13) . . ? 
N1 C39 N2 121.06(12) . . ? 
N1 C39 C31 115.63(12) . . ? 
N2 C39 C31 123.30(12) . . ? 
  
loop_ 
 _geom_hbond_atom_site_label_D 
 _geom_hbond_atom_site_label_H 
 _geom_hbond_atom_site_label_A 
 _geom_hbond_distance_DH 
 _geom_hbond_distance_HA 
 _geom_hbond_distance_DA 
 _geom_hbond_angle_DHA 
 _geom_hbond_site_symmetry_A 
N1 H1 F2  0.825(14) 2.574(17) 3.1573(16) 128.8(16) 11_454 
N1 H1 F4  0.825(14) 2.123(15) 2.9414(16) 172(2) 11_454 
  
_diffrn_measured_fraction_theta_max    0.989 
_diffrn_reflns_theta_full              32.58 
_diffrn_measured_fraction_theta_full   0.989 
_refine_diff_density_max    0.521 
_refine_diff_density_min   -0.328 
_refine_diff_density_rms    0.064

#===END

data_1 
 
_audit_creation_method            SHELXL-97 
_chemical_name_systematic 
; 
 ? 
; 
_chemical_name_common             ? 
_chemical_melting_point           ? 
_chemical_formula_moiety          ? 
_chemical_formula_sum 
 'C31 H27 B F4 N2 O5 P Re' 
_chemical_formula_weight          811.53 
 
loop_ 
 _atom_type_symbol 
 _atom_type_description 
 _atom_type_scat_dispersion_real 
 _atom_type_scat_dispersion_imag 
 _atom_type_scat_source 
 'C'  'C'   0.0033   0.0016 
 'International Tables Vol C Tables 4.2.6.8 and 6.1.1.4' 
 'H'  'H'   0.0000   0.0000 
 'International Tables Vol C Tables 4.2.6.8 and 6.1.1.4' 
 'B'  'B'   0.0013   0.0007 
 'International Tables Vol C Tables 4.2.6.8 and 6.1.1.4' 
 'N'  'N'   0.0061   0.0033 
 'International Tables Vol C Tables 4.2.6.8 and 6.1.1.4' 
 'O'  'O'   0.0106   0.0060 
 'International Tables Vol C Tables 4.2.6.8 and 6.1.1.4' 
 'F'  'F'   0.0171   0.0103 
 'International Tables Vol C Tables 4.2.6.8 and 6.1.1.4' 
 'P'  'P'   0.1023   0.0942 
 'International Tables Vol C Tables 4.2.6.8 and 6.1.1.4' 
 'Re'  'Re'  -1.0185   7.2310 
 'International Tables Vol C Tables 4.2.6.8 and 6.1.1.4' 
 
_symmetry_cell_setting            Monoclinic 
_symmetry_space_group_name_H-M    P2(1) 
 
loop_ 
 _symmetry_equiv_pos_as_xyz 
 'x, y, z' 
 '-x, y+1/2, -z' 
 
_cell_length_a                    9.5088(3) 
_cell_length_b                    11.7547(3) 
_cell_length_c                    13.9882(4) 
_cell_angle_alpha                 90.00 
_cell_angle_beta                  100.5400(10) 
_cell_angle_gamma                 90.00 
_cell_volume                      1537.12(8) 
_cell_formula_units_Z             2 
_cell_measurement_temperature     100(2) 
_cell_measurement_reflns_used     ? 
_cell_measurement_theta_min       ? 
_cell_measurement_theta_max       ? 
 
_exptl_crystal_description        block 
_exptl_crystal_colour             yellow 
_exptl_crystal_size_max           0.30 
_exptl_crystal_size_mid           0.18 
_exptl_crystal_size_min           0.18 
_exptl_crystal_density_meas       ? 
_exptl_crystal_density_diffrn     1.753 
_exptl_crystal_density_method     'not measured' 
_exptl_crystal_F_000              796 
_exptl_absorpt_coefficient_mu     4.072 
_exptl_absorpt_correction_type    multi-scan 
_exptl_absorpt_correction_T_min   0.3746 
_exptl_absorpt_correction_T_max   0.5277 
_exptl_absorpt_process_details    sadabs 
 
_exptl_special_details 
; 
 ? 
; 
 
_diffrn_ambient_temperature       100(2) 
_diffrn_radiation_wavelength      0.71073 
_diffrn_radiation_type            MoK\a 
_diffrn_radiation_source          'fine-focus sealed tube' 
_diffrn_radiation_monochromator   graphite 
_diffrn_measurement_device_type   ? 
_diffrn_measurement_method        ? 
_diffrn_detector_area_resol_mean  ? 
_diffrn_reflns_number             108660 
_diffrn_reflns_av_R_equivalents   0.0433 
_diffrn_reflns_av_sigmaI/netI     0.0382 
_diffrn_reflns_limit_h_min        -19 
_diffrn_reflns_limit_h_max        19 
_diffrn_reflns_limit_k_min        -23 
_diffrn_reflns_limit_k_max        23 
_diffrn_reflns_limit_l_min        -27 
_diffrn_reflns_limit_l_max        28 
_diffrn_reflns_theta_min          1.48 
_diffrn_reflns_theta_max          45.82 
_reflns_number_total              26187 
_reflns_number_gt                 23192 
_reflns_threshold_expression      >2sigma(I) 
 
_computing_data_collection        ? 
_computing_cell_refinement        ? 
_computing_data_reduction         ? 
_computing_structure_solution     'SHELXS-97 (Sheldrick, 2008)' 
_computing_structure_refinement   'SHELXL-97 (Sheldrick, 2008)' 
_computing_molecular_graphics     ? 
_computing_publication_material   ? 
 
_refine_special_details 
; 
 Refinement of F^2^ against ALL reflections.  The weighted R-factor wR and 
 goodness of fit S are based on F^2^, conventional R-factors R are based 
 on F, with F set to zero for negative F^2^. The threshold expression of 
 F^2^ > 2sigma(F^2^) is used only for calculating R-factors(gt) etc. and is 
 not relevant to the choice of reflections for refinement.  R-factors based 
 on F^2^ are statistically about twice as large as those based on F, and R- 
 factors based on ALL data will be even larger. 
; 
 
_refine_ls_structure_factor_coef  Fsqd  
_refine_ls_matrix_type            full 
_refine_ls_weighting_scheme       calc  
_refine_ls_weighting_details 
 'calc w=1/[\s^2^(Fo^2^)+(0.0175P)^2^+0.9568P] where P=(Fo^2^+2Fc^2^)/3' 
_atom_sites_solution_primary      direct 
_atom_sites_solution_secondary    difmap 
_atom_sites_solution_hydrogens    geom 
_refine_ls_hydrogen_treatment     constr 
_refine_ls_extinction_method      none 
_refine_ls_extinction_coef        ? 
_refine_ls_abs_structure_details 
 'Flack H D (1983), Acta Cryst. A39, 876-881' 
_refine_ls_abs_structure_Flack    -0.030(3) 
_refine_ls_number_reflns          26187 
_refine_ls_number_parameters      419 
_refine_ls_number_restraints      135 
_refine_ls_R_factor_all           0.0371 
_refine_ls_R_factor_gt            0.0290 
_refine_ls_wR_factor_ref          0.0597 
_refine_ls_wR_factor_gt           0.0569 
_refine_ls_goodness_of_fit_ref    1.090 
_refine_ls_restrained_S_all       1.108 
_refine_ls_shift/su_max           0.003 
_refine_ls_shift/su_mean          0.000 
 
loop_ 
 _atom_site_label 
 _atom_site_type_symbol 
 _atom_site_fract_x 
 _atom_site_fract_y 
 _atom_site_fract_z 
 _atom_site_U_iso_or_equiv 
 _atom_site_adp_type 
 _atom_site_occupancy 
 _atom_site_symmetry_multiplicity 
 _atom_site_calc_flag 
 _atom_site_refinement_flags 
 _atom_site_disorder_assembly 
 _atom_site_disorder_group 
B1 B 0.0902(3) -0.0075(2) 0.2240(2) 0.0255(5) Uani 1 1 d DU . . 
P1 P 1.48199(4) 0.45505(4) 0.21503(3) 0.00845(6) Uani 1 1 d . . . 
Re1 Re 1.464381(6) 0.250082(6) 0.169336(4) 0.01026(1) Uani 1 1 d . . . 
O1 O 1.4733(2) 0.19017(14) 0.39081(11) 0.0210(3) Uani 1 1 d . . . 
O2 O 1.44629(18) 0.28967(14) -0.05440(11) 0.0190(2) Uani 1 1 d . . . 
O3 O 1.12734(16) 0.26552(19) 0.12460(11) 0.0214(4) Uani 1 1 d . . . 
O4 O 1.80113(14) 0.2498(3) 0.21823(12) 0.0272(3) Uani 1 1 d . . . 
O5 O 1.4387(2) -0.00640(13) 0.11280(13) 0.0263(3) Uani 1 1 d . . . 
C1 C 1.4677(2) 0.21207(15) 0.31134(13) 0.0152(3) Uani 1 1 d . . . 
C2 C 1.45691(19) 0.27889(15) 0.02757(13) 0.0136(2) Uani 1 1 d . . . 
C3 C 1.24857(18) 0.2605(3) 0.14397(12) 0.0148(3) Uani 1 1 d . . . 
C4 C 1.67970(17) 0.2476(3) 0.19849(12) 0.0170(3) Uani 1 1 d . . . 
C5 C 1.4486(2) 0.08641(16) 0.13595(14) 0.0175(3) Uani 1 1 d . . . 
C11 C 1.35602(17) 0.55417(14) 0.14599(11) 0.0103(2) Uani 1 1 d . . . 
C12 C 1.27556(18) 0.52628(15) 0.05492(12) 0.0133(2) Uani 1 1 d . . . 
H12 H 1.2781 0.4510 0.0305 0.016 Uiso 1 1 calc R . . 
C13 C 1.1914(2) 0.60897(18) -0.00017(14) 0.0171(3) Uani 1 1 d . . . 
H13 H 1.1373 0.5900 -0.0621 0.021 Uiso 1 1 calc R . . 
C14 C 1.1869(2) 0.71909(17) 0.03567(15) 0.0173(3) Uani 1 1 d . . . 
H14 H 1.1296 0.7751 -0.0020 0.021 Uiso 1 1 calc R . . 
C15 C 1.26583(16) 0.7479(3) 0.12661(11) 0.0155(2) Uani 1 1 d . . . 
H15 H 1.2619 0.8229 0.1512 0.019 Uiso 1 1 calc R . . 
C16 C 1.35061(18) 0.66524(14) 0.18105(13) 0.0128(2) Uani 1 1 d . . . 
H16 H 1.4053 0.6847 0.2427 0.015 Uiso 1 1 calc R . . 
C21 C 1.64633(17) 0.52797(14) 0.19633(11) 0.0105(2) Uani 1 1 d . . . 
C22 C 1.70006(18) 0.62402(15) 0.25075(13) 0.0126(2) Uani 1 1 d . . . 
H22 H 1.6615 0.6452 0.3062 0.015 Uiso 1 1 calc R . . 
C23 C 1.80949(19) 0.68843(16) 0.22401(15) 0.0153(3) Uani 1 1 d . . . 
H23 H 1.8463 0.7524 0.2620 0.018 Uiso 1 1 calc R . . 
C24 C 1.8654(2) 0.65958(18) 0.14173(15) 0.0174(3) Uani 1 1 d . . . 
H24 H 1.9388 0.7047 0.1231 0.021 Uiso 1 1 calc R . . 
C25 C 1.8136(2) 0.56493(18) 0.08713(14) 0.0169(3) Uani 1 1 d . . . 
H25 H 1.8520 0.5448 0.0313 0.020 Uiso 1 1 calc R . . 
C26 C 1.70463(18) 0.49918(16) 0.11445(12) 0.0134(2) Uani 1 1 d . . . 
H26 H 1.6698 0.4343 0.0770 0.016 Uiso 1 1 calc R . . 
C31 C 1.47911(16) 0.46941(13) 0.34422(11) 0.0090(2) Uani 1 1 d . . . 
C32 C 1.61507(17) 0.46116(14) 0.40764(12) 0.0112(2) Uani 1 1 d . . . 
H32 H 1.7004 0.4722 0.3826 0.013 Uiso 1 1 calc R . . 
C33 C 1.62285(18) 0.43729(14) 0.50476(11) 0.0115(2) Uani 1 1 d . . . 
H33 H 1.7129 0.4216 0.5445 0.014 Uiso 1 1 calc R . . 
C34 C 1.49748(18) 0.43603(14) 0.54585(11) 0.0116(2) Uani 1 1 d . . . 
C35 C 1.36318(17) 0.46273(14) 0.48625(11) 0.0105(2) Uani 1 1 d . . . 
C36 C 1.35282(16) 0.46083(14) 0.38164(11) 0.0097(2) Uani 1 1 d . . . 
C37 C 1.24457(18) 0.48762(16) 0.53384(12) 0.0132(2) Uani 1 1 d . . . 
C38 C 1.2533(2) 0.45676(19) 0.63028(13) 0.0174(3) Uani 1 1 d . . . 
H38 H 1.1722 0.4657 0.6604 0.021 Uiso 1 1 calc R . . 
C39 C 1.3818(2) 0.41198(18) 0.68445(13) 0.0177(3) Uani 1 1 d . . . 
H39 H 1.3834 0.3843 0.7484 0.021 Uiso 1 1 calc R . . 
C40 C 1.5040(2) 0.40830(16) 0.64531(12) 0.0150(3) Uani 1 1 d . . . 
H40 H 1.5925 0.3873 0.6846 0.018 Uiso 1 1 calc R . . 
C101 C 1.1502(2) 0.32991(18) 0.35655(14) 0.0175(3) Uani 1 1 d . . . 
H10A H 1.2212 0.2765 0.3908 0.026 Uiso 1 1 calc R . . 
H10B H 1.0890 0.2907 0.3026 0.026 Uiso 1 1 calc R . . 
H10C H 1.0914 0.3592 0.4018 0.026 Uiso 1 1 calc R . . 
C102 C 1.11765(19) 0.5061(2) 0.26850(15) 0.0180(3) Uani 1 1 d . . . 
H10D H 1.0397 0.5137 0.3052 0.027 Uiso 1 1 calc R . . 
H10E H 1.0792 0.4781 0.2029 0.027 Uiso 1 1 calc R . . 
H10F H 1.1628 0.5804 0.2641 0.027 Uiso 1 1 calc R . . 
C201 C 1.1642(2) 0.66507(19) 0.45763(18) 0.0221(4) Uani 1 1 d . . . 
H20A H 1.1785 0.7119 0.5166 0.033 Uiso 1 1 calc R . . 
H20B H 1.0863 0.6970 0.4095 0.033 Uiso 1 1 calc R . . 
H20C H 1.2524 0.6641 0.4307 0.033 Uiso 1 1 calc R . . 
C202 C 0.9967(2) 0.5481(2) 0.52212(17) 0.0245(4) Uani 1 1 d . . . 
H20D H 0.9722 0.4696 0.5361 0.037 Uiso 1 1 calc R . . 
H20E H 0.9186 0.5816 0.4751 0.037 Uiso 1 1 calc R . . 
H20F H 1.0114 0.5927 0.5823 0.037 Uiso 1 1 calc R . . 
N1 N 1.22419(16) 0.42542(14) 0.31817(11) 0.0128(2) Uani 1 1 d . . . 
N2 N 1.12755(17) 0.54871(15) 0.48164(12) 0.0154(2) Uani 1 1 d . . . 
F1 F 0.1087(4) -0.0184(3) 0.13038(17) 0.0499(11) Uani 0.795(6) 1 d PDU A 1 
F1A F 0.2125(9) 0.0278(9) 0.2122(8) 0.036(2) Uiso 0.205(6) 1 d PDU A 2 
F2 F -0.0307(2) 0.05258(19) 0.23029(13) 0.0364(4) Uani 1 1 d DU A . 
F3 F 0.2066(3) 0.0652(3) 0.2722(3) 0.0538(11) Uani 0.795(6) 1 d PDU A 1 
F3A F 0.0290(11) -0.0683(9) 0.1262(6) 0.036(2) Uiso 0.205(6) 1 d PDU A 2 
F4 F 0.1006(2) -0.10704(14) 0.27746(13) 0.0314(3) Uani 1 1 d DU A . 
 
loop_ 
 _atom_site_aniso_label 
 _atom_site_aniso_U_11 
 _atom_site_aniso_U_22 
 _atom_site_aniso_U_33 
 _atom_site_aniso_U_23 
 _atom_site_aniso_U_13 
 _atom_site_aniso_U_12 
B1 0.0276(11) 0.0284(11) 0.0242(11) 0.0137(9) 0.0149(9) 0.0147(9) 
P1 0.00870(14) 0.00869(14) 0.00786(13) -0.00048(11) 0.00126(10) 0.00009(11) 
Re1 0.01256(2) 0.00801(2) 0.00967(2) -0.00071(3) 0.00059(1) 0.00021(4) 
O1 0.0320(8) 0.0167(6) 0.0137(5) 0.0028(5) 0.0025(5) 0.0004(5) 
O2 0.0218(6) 0.0223(6) 0.0133(5) -0.0018(5) 0.0044(4) -0.0034(5) 
O3 0.0152(5) 0.0275(12) 0.0198(5) -0.0011(6) -0.0010(4) -0.0031(5) 
O4 0.0143(5) 0.0278(6) 0.0370(7) -0.0043(14) -0.0023(5) 0.0053(11) 
O5 0.0436(10) 0.0099(5) 0.0218(7) -0.0036(5) -0.0030(6) 0.0015(6) 
C1 0.0198(7) 0.0103(6) 0.0145(6) 0.0009(5) 0.0008(5) -0.0004(5) 
C2 0.0145(6) 0.0129(5) 0.0135(6) -0.0021(4) 0.0026(5) -0.0014(4) 
C3 0.0155(5) 0.0147(10) 0.0133(5) 0.0000(6) 0.0007(4) -0.0029(6) 
C4 0.0161(5) 0.0157(6) 0.0178(5) -0.0026(10) -0.0003(4) 0.0058(10) 
C5 0.0258(9) 0.0110(6) 0.0138(7) -0.0004(5) -0.0015(6) 0.0010(6) 
C11 0.0099(5) 0.0107(5) 0.0099(5) 0.0009(4) 0.0011(4) 0.0000(4) 
C12 0.0127(6) 0.0152(6) 0.0109(5) -0.0008(5) -0.0011(4) 0.0011(5) 
C13 0.0137(6) 0.0223(8) 0.0134(6) 0.0036(6) -0.0023(5) 0.0019(6) 
C14 0.0133(6) 0.0183(6) 0.0198(7) 0.0065(5) 0.0019(5) 0.0029(5) 
C15 0.0136(5) 0.0134(5) 0.0199(5) 0.0043(10) 0.0044(4) 0.0046(9) 
C16 0.0126(6) 0.0114(5) 0.0145(6) 0.0000(4) 0.0025(5) 0.0017(5) 
C21 0.0095(5) 0.0114(5) 0.0107(5) 0.0013(4) 0.0022(4) 0.0007(4) 
C22 0.0109(6) 0.0123(6) 0.0146(6) -0.0006(5) 0.0026(4) -0.0006(4) 
C23 0.0106(6) 0.0145(6) 0.0208(7) 0.0017(5) 0.0030(5) -0.0012(5) 
C24 0.0120(6) 0.0198(7) 0.0213(8) 0.0051(6) 0.0056(5) 0.0000(5) 
C25 0.0135(6) 0.0227(8) 0.0160(7) 0.0044(6) 0.0066(5) 0.0022(6) 
C26 0.0120(6) 0.0171(6) 0.0116(6) 0.0006(5) 0.0039(4) 0.0008(5) 
C31 0.0085(5) 0.0102(5) 0.0080(5) -0.0003(4) 0.0012(4) 0.0002(4) 
C32 0.0094(5) 0.0128(5) 0.0108(5) 0.0005(4) 0.0004(4) -0.0008(4) 
C33 0.0121(6) 0.0140(6) 0.0076(5) -0.0001(4) -0.0002(4) -0.0005(4) 
C34 0.0121(6) 0.0132(6) 0.0087(5) 0.0013(4) 0.0001(4) -0.0018(4) 
C35 0.0098(5) 0.0125(5) 0.0092(5) 0.0009(4) 0.0018(4) -0.0011(4) 
C36 0.0088(5) 0.0117(5) 0.0084(5) 0.0004(4) 0.0009(4) -0.0003(4) 
C37 0.0120(6) 0.0163(6) 0.0120(6) 0.0002(5) 0.0043(4) -0.0020(5) 
C38 0.0183(7) 0.0232(8) 0.0122(6) 0.0008(6) 0.0066(5) -0.0043(6) 
C39 0.0223(8) 0.0218(8) 0.0090(6) 0.0019(5) 0.0033(5) -0.0057(6) 
C40 0.0176(7) 0.0172(7) 0.0094(5) 0.0033(5) 0.0001(5) -0.0031(5) 
C101 0.0139(7) 0.0205(7) 0.0173(7) -0.0014(6) 0.0010(5) -0.0063(6) 
C102 0.0094(6) 0.0289(9) 0.0158(7) 0.0055(7) 0.0023(5) 0.0037(6) 
C201 0.0194(8) 0.0188(8) 0.0287(10) 0.0024(7) 0.0063(7) 0.0035(6) 
C202 0.0141(7) 0.0382(12) 0.0236(9) 0.0023(8) 0.0094(6) 0.0029(7) 
N1 0.0082(5) 0.0179(6) 0.0115(5) 0.0003(4) -0.0006(4) -0.0024(4) 
N2 0.0126(5) 0.0192(6) 0.0157(6) 0.0009(5) 0.0064(4) 0.0011(5) 
F1 0.080(2) 0.0523(17) 0.0267(10) 0.0200(10) 0.0329(12) 0.0463(17) 
F2 0.0350(8) 0.0524(11) 0.0253(7) 0.0119(7) 0.0148(6) 0.0258(8) 
F3 0.0400(14) 0.0377(15) 0.077(3) 0.0230(16) -0.0081(14) -0.0121(11) 
F4 0.0459(10) 0.0204(6) 0.0274(7) 0.0101(5) 0.0053(7) 0.0025(6) 
 
_geom_special_details 
; 
 All esds (except the esd in the dihedral angle between two l.s. planes) 
 are estimated using the full covariance matrix.  The cell esds are taken 
 into account individually in the estimation of esds in distances, angles 
 and torsion angles; correlations between esds in cell parameters are only 
 used when they are defined by crystal symmetry.  An approximate (isotropic) 
 treatment of cell esds is used for estimating esds involving l.s. planes. 
; 
 
loop_ 
 _geom_bond_atom_site_label_1 
 _geom_bond_atom_site_label_2 
 _geom_bond_distance 
 _geom_bond_site_symmetry_2 
 _geom_bond_publ_flag 
B1 F1A 1.273(8) . ? 
B1 F1 1.358(3) . ? 
B1 F2 1.366(3) . ? 
B1 F4 1.382(3) . ? 
B1 F3 1.462(4) . ? 
B1 F3A 1.558(8) . ? 
P1 C11 1.8171(16) . ? 
P1 C31 1.8203(15) . ? 
P1 C21 1.8425(16) . ? 
P1 Re1 2.4904(4) . ? 
Re1 C5 1.9790(19) . ? 
Re1 C2 2.0001(18) . ? 
Re1 C4 2.0134(16) . ? 
Re1 C3 2.0213(17) . ? 
Re1 C1 2.0307(19) . ? 
O1 C1 1.133(2) . ? 
O2 C2 1.140(2) . ? 
O3 C3 1.136(2) . ? 
O4 C4 1.137(2) . ? 
O5 C5 1.137(2) . ? 
C11 C16 1.399(2) . ? 
C11 C12 1.400(2) . ? 
C12 C13 1.397(2) . ? 
C13 C14 1.392(3) . ? 
C14 C15 1.395(3) . ? 
C15 C16 1.396(3) . ? 
C21 C26 1.402(2) . ? 
C21 C22 1.405(2) . ? 
C22 C23 1.392(2) . ? 
C23 C24 1.395(3) . ? 
C24 C25 1.388(3) . ? 
C25 C26 1.401(3) . ? 
C31 C36 1.399(2) . ? 
C31 C32 1.431(2) . ? 
C32 C33 1.376(2) . ? 
C33 C34 1.415(2) . ? 
C34 C40 1.419(2) . ? 
C34 C35 1.427(2) . ? 
C35 C37 1.441(2) . ? 
C35 C36 1.449(2) . ? 
C36 N1 1.435(2) . ? 
C37 C38 1.385(2) . ? 
C37 N2 1.411(2) . ? 
C38 C39 1.416(3) . ? 
C39 C40 1.373(3) . ? 
C101 N1 1.477(2) . ? 
C102 N1 1.466(2) . ? 
C201 N2 1.466(3) . ? 
C202 N2 1.458(2) . ? 
 
loop_ 
 _geom_angle_atom_site_label_1 
 _geom_angle_atom_site_label_2 
 _geom_angle_atom_site_label_3 
 _geom_angle 
 _geom_angle_site_symmetry_1 
 _geom_angle_site_symmetry_3 
 _geom_angle_publ_flag 
F1A B1 F1 67.9(5) . . ? 
F1A B1 F2 129.7(5) . . ? 
F1 B1 F2 111.7(2) . . ? 
F1A B1 F4 111.7(5) . . ? 
F1 B1 F4 115.7(3) . . ? 
F2 B1 F4 112.3(2) . . ? 
F1A B1 F3 40.3(5) . . ? 
F1 B1 F3 106.2(3) . . ? 
F2 B1 F3 104.0(3) . . ? 
F4 B1 F3 105.8(2) . . ? 
F1A B1 F3A 103.8(6) . . ? 
F1 B1 F3A 37.3(4) . . ? 
F2 B1 F3A 96.3(4) . . ? 
F4 B1 F3A 93.8(4) . . ? 
F3 B1 F3A 143.4(5) . . ? 
C11 P1 C31 109.88(7) . . ? 
C11 P1 C21 96.89(7) . . ? 
C31 P1 C21 105.37(7) . . ? 
C11 P1 Re1 118.49(5) . . ? 
C31 P1 Re1 109.39(5) . . ? 
C21 P1 Re1 115.63(5) . . ? 
C5 Re1 C2 86.75(8) . . ? 
C5 Re1 C4 93.68(13) . . ? 
C2 Re1 C4 93.08(7) . . ? 
C5 Re1 C3 89.24(10) . . ? 
C2 Re1 C3 87.99(7) . . ? 
C4 Re1 C3 176.94(14) . . ? 
C5 Re1 C1 90.22(8) . . ? 
C2 Re1 C1 176.83(7) . . ? 
C4 Re1 C1 88.03(8) . . ? 
C3 Re1 C1 91.06(8) . . ? 
C5 Re1 P1 178.61(6) . . ? 
C2 Re1 P1 94.54(5) . . ? 
C4 Re1 P1 86.78(11) . . ? 
C3 Re1 P1 90.29(8) . . ? 
C1 Re1 P1 88.48(5) . . ? 
O1 C1 Re1 178.13(19) . . ? 
O2 C2 Re1 175.52(16) . . ? 
O3 C3 Re1 176.36(16) . . ? 
O4 C4 Re1 176.9(3) . . ? 
O5 C5 Re1 177.15(18) . . ? 
C16 C11 C12 119.25(15) . . ? 
C16 C11 P1 118.36(12) . . ? 
C12 C11 P1 122.08(13) . . ? 
C13 C12 C11 120.10(17) . . ? 
C14 C13 C12 120.05(17) . . ? 
C13 C14 C15 120.5(2) . . ? 
C14 C15 C16 119.3(3) . . ? 
C15 C16 C11 120.85(18) . . ? 
C26 C21 C22 118.54(15) . . ? 
C26 C21 P1 118.42(13) . . ? 
C22 C21 P1 122.07(12) . . ? 
C23 C22 C21 120.48(16) . . ? 
C22 C23 C24 120.38(17) . . ? 
C25 C24 C23 119.91(17) . . ? 
C24 C25 C26 119.85(17) . . ? 
C25 C26 C21 120.83(17) . . ? 
C36 C31 C32 120.21(14) . . ? 
C36 C31 P1 122.33(11) . . ? 
C32 C31 P1 115.67(11) . . ? 
C33 C32 C31 120.34(15) . . ? 
C32 C33 C34 120.41(15) . . ? 
C33 C34 C40 120.79(15) . . ? 
C33 C34 C35 119.40(14) . . ? 
C40 C34 C35 119.81(15) . . ? 
C34 C35 C37 117.87(14) . . ? 
C34 C35 C36 118.37(14) . . ? 
C37 C35 C36 123.75(14) . . ? 
C31 C36 N1 118.83(14) . . ? 
C31 C36 C35 118.20(13) . . ? 
N1 C36 C35 121.47(14) . . ? 
C38 C37 N2 122.58(16) . . ? 
C38 C37 C35 118.99(17) . . ? 
N2 C37 C35 118.31(15) . . ? 
C37 C38 C39 120.70(17) . . ? 
C40 C39 C38 120.58(16) . . ? 
C39 C40 C34 119.70(17) . . ? 
C36 N1 C102 122.84(16) . . ? 
C36 N1 C101 113.84(14) . . ? 
C102 N1 C101 109.27(15) . . ? 
C37 N2 C202 116.40(16) . . ? 
C37 N2 C201 113.30(16) . . ? 
C202 N2 C201 110.44(18) . . ? 
 
_diffrn_measured_fraction_theta_max    0.994 
_diffrn_reflns_theta_full              30.00 
_diffrn_measured_fraction_theta_full   1.000 
_refine_diff_density_max    5.030 
_refine_diff_density_min   -3.220 
_refine_diff_density_rms    0.146 

#===END

data_2 
  
_audit_creation_method            SHELXL-97 
_chemical_name_systematic 
; 
 ? 
; 
_chemical_name_common             ? 
_chemical_melting_point           ? 
_chemical_formula_moiety          ? 
_chemical_formula_sum 
 'C31 H30 F3 N O9 P Re S' 
_chemical_formula_weight          866.79 
  
loop_ 
 _atom_type_symbol 
 _atom_type_description 
 _atom_type_scat_dispersion_real 
 _atom_type_scat_dispersion_imag 
 _atom_type_scat_source 
 'C'  'C'   0.0033   0.0016 
 'International Tables Vol C Tables 4.2.6.8 and 6.1.1.4' 
 'H'  'H'   0.0000   0.0000 
 'International Tables Vol C Tables 4.2.6.8 and 6.1.1.4' 
 'N'  'N'   0.0061   0.0033 
 'International Tables Vol C Tables 4.2.6.8 and 6.1.1.4' 
 'O'  'O'   0.0106   0.0060 
 'International Tables Vol C Tables 4.2.6.8 and 6.1.1.4' 
 'F'  'F'   0.0171   0.0103 
 'International Tables Vol C Tables 4.2.6.8 and 6.1.1.4' 
 'P'  'P'   0.1023   0.0942 
 'International Tables Vol C Tables 4.2.6.8 and 6.1.1.4' 
 'S'  'S'   0.1246   0.1234 
 'International Tables Vol C Tables 4.2.6.8 and 6.1.1.4' 
 'Re'  'Re'  -1.0185   7.2310 
 'International Tables Vol C Tables 4.2.6.8 and 6.1.1.4' 
  
_symmetry_cell_setting            Triclinic 
_symmetry_space_group_name_H-M    P-1 
  
loop_ 
 _symmetry_equiv_pos_as_xyz 
 'x, y, z' 
 '-x, -y, -z' 
  
_cell_length_a                    11.7178(5) 
_cell_length_b                    12.2209(4) 
_cell_length_c                    13.1459(5) 
_cell_angle_alpha                 97.170(2) 
_cell_angle_beta                  114.524(2) 
_cell_angle_gamma                 98.649(2) 
_cell_volume                      1656.12(11) 
_cell_formula_units_Z             2 
_cell_measurement_temperature     100(2) 
_cell_measurement_reflns_used     9991 
_cell_measurement_theta_min       2.56 
_cell_measurement_theta_max       39.60 
  
_exptl_crystal_description        needle 
_exptl_crystal_colour             colourless 
_exptl_crystal_size_max           0.43 
_exptl_crystal_size_mid           0.15 
_exptl_crystal_size_min           0.13 
_exptl_crystal_density_meas       ? 
_exptl_crystal_density_diffrn     1.738 
_exptl_crystal_density_method     'not measured' 
_exptl_crystal_F_000              856 
_exptl_absorpt_coefficient_mu     3.850 
_exptl_absorpt_correction_type    multi-scan 
_exptl_absorpt_correction_T_min   0.2883 
_exptl_absorpt_correction_T_max   0.6344 
_exptl_absorpt_process_details    sadabs 
  
_exptl_special_details 
; 
 ? 
; 
  
_diffrn_ambient_temperature       100(2) 
_diffrn_radiation_wavelength      0.71073 
_diffrn_radiation_type            MoK\a 
_diffrn_radiation_source          'fine-focus sealed tube' 
_diffrn_radiation_monochromator   graphite 
_diffrn_measurement_device_type   'Bruker APEX-II CCD' 
_diffrn_measurement_method        '\f and \w scans' 
_diffrn_detector_area_resol_mean  ? 
_diffrn_reflns_number             163818 
_diffrn_reflns_av_R_equivalents   0.0560 
_diffrn_reflns_av_sigmaI/netI     0.0350 
_diffrn_reflns_limit_h_min        -20 
_diffrn_reflns_limit_h_max        20 
_diffrn_reflns_limit_k_min        -21 
_diffrn_reflns_limit_k_max        21 
_diffrn_reflns_limit_l_min        -23 
_diffrn_reflns_limit_l_max        23 
_diffrn_reflns_theta_min          1.96 
_diffrn_reflns_theta_max          39.39 
_reflns_number_total              19736 
_reflns_number_gt                 17004 
_reflns_threshold_expression      >2sigma(I) 
  
_computing_data_collection        'Bruker APEX2' 
_computing_cell_refinement        'Bruker SAINT' 
_computing_data_reduction         'Bruker SAINT' 
_computing_structure_solution     'SHELXS-97 (Sheldrick, 2008)' 
_computing_structure_refinement   'SHELXL-97 (Sheldrick, 2008)' 
_computing_molecular_graphics     'Bruker SHELXTL' 
_computing_publication_material   'Bruker SHELXTL' 
  
_refine_special_details 
; 
 Refinement of F^2^ against ALL reflections.  The weighted R-factor wR and 
 goodness of fit S are based on F^2^, conventional R-factors R are based 
 on F, with F set to zero for negative F^2^. The threshold expression of 
 F^2^ > 2sigma(F^2^) is used only for calculating R-factors(gt) etc. and is 
 not relevant to the choice of reflections for refinement.  R-factors based 
 on F^2^ are statistically about twice as large as those based on F, and R- 
 factors based on ALL data will be even larger. 
; 
  
_refine_ls_structure_factor_coef  Fsqd 
_refine_ls_matrix_type            full 
_refine_ls_weighting_scheme       calc 
_refine_ls_weighting_details 
 'calc w=1/[\s^2^(Fo^2^)+(0.0203P)^2^+1.2280P] where P=(Fo^2^+2Fc^2^)/3' 
_atom_sites_solution_primary      direct 
_atom_sites_solution_secondary    difmap 
_atom_sites_solution_hydrogens    geom 
_refine_ls_hydrogen_treatment     constr 
_refine_ls_extinction_method      none 
_refine_ls_extinction_coef        ? 
_refine_ls_number_reflns          19736 
_refine_ls_number_parameters      426 
_refine_ls_number_restraints      0 
_refine_ls_R_factor_all           0.0368 
_refine_ls_R_factor_gt            0.0255 
_refine_ls_wR_factor_ref          0.0528 
_refine_ls_wR_factor_gt           0.0494 
_refine_ls_goodness_of_fit_ref    1.015 
_refine_ls_restrained_S_all       1.015 
_refine_ls_shift/su_max           0.004 
_refine_ls_shift/su_mean          0.000 
  
loop_ 
 _atom_site_label 
 _atom_site_type_symbol 
 _atom_site_fract_x 
 _atom_site_fract_y 
 _atom_site_fract_z 
 _atom_site_U_iso_or_equiv 
 _atom_site_adp_type 
 _atom_site_occupancy 
 _atom_site_symmetry_multiplicity 
 _atom_site_calc_flag 
 _atom_site_refinement_flags 
 _atom_site_disorder_assembly 
 _atom_site_disorder_group 
S1 S 1.17726(4) 0.66505(3) 0.38249(3) 0.01639(6) Uani 1 1 d . . . 
N1 N 1.34862(13) 0.84660(12) 0.84729(12) 0.0179(2) Uani 1 1 d . . . 
P1 P 0.92835(3) 0.85855(3) 0.71967(3) 0.00995(5) Uani 1 1 d . . . 
Re1 Re 0.857074(5) 0.737367(4) 0.526687(4) 0.00993(1) Uani 1 1 d . . . 
O1 O 0.77747(13) 0.58277(10) 0.28980(10) 0.0220(2) Uani 1 1 d . . . 
O1S O 0.51327(15) 0.62853(15) 0.26617(15) 0.0383(4) Uani 1 1 d . . . 
O2 O 0.62888(12) 0.59414(11) 0.55418(12) 0.0245(2) Uani 1 1 d . . . 
O3 O 0.65696(13) 0.87634(11) 0.39958(10) 0.0229(2) Uani 1 1 d . . . 
O4 O 1.06650(12) 0.90268(10) 0.49463(10) 0.0180(2) Uani 1 1 d . . . 
O5 O 1.04777(12) 0.58001(10) 0.63108(11) 0.0201(2) Uani 1 1 d . . . 
O6 O 1.10700(15) 0.66108(12) 0.44981(15) 0.0327(3) Uani 1 1 d . . . 
O7 O 1.18484(15) 0.55675(11) 0.33166(14) 0.0327(3) Uani 1 1 d . . . 
O8 O 1.15371(14) 0.74628(12) 0.30999(11) 0.0282(3) Uani 1 1 d . . . 
C1 C 0.80526(15) 0.63926(12) 0.37536(13) 0.0151(2) Uani 1 1 d . . . 
C1S C 0.4628(3) 0.5101(2) 0.2446(2) 0.0438(6) Uani 1 1 d . . . 
H1S1 H 0.4044 0.4945 0.2806 0.053 Uiso 1 1 calc R . . 
H1S2 H 0.5333 0.4700 0.2756 0.053 Uiso 1 1 calc R . . 
C2 C 0.71330(15) 0.64271(13) 0.54614(13) 0.0160(2) Uani 1 1 d . . . 
C2S C 0.3900(3) 0.4721(2) 0.1157(3) 0.0538(7) Uani 1 1 d . . . 
H2S1 H 0.3110 0.4133 0.0933 0.065 Uiso 1 1 calc R . . 
H2S2 H 0.4444 0.4421 0.0833 0.065 Uiso 1 1 calc R . . 
C3 C 0.73064(15) 0.82840(13) 0.44829(12) 0.0154(2) Uani 1 1 d . . . 
C3S C 0.3570(3) 0.5808(2) 0.0762(2) 0.0450(6) Uani 1 1 d . . . 
H3S1 H 0.3970 0.6015 0.0261 0.054 Uiso 1 1 calc R . . 
H3S2 H 0.2627 0.5718 0.0343 0.054 Uiso 1 1 calc R . . 
C4 C 0.99334(14) 0.84060(12) 0.50616(12) 0.0133(2) Uani 1 1 d . . . 
C4S C 0.4120(2) 0.6690(2) 0.1856(2) 0.0366(5) Uani 1 1 d . . . 
H4S1 H 0.4459 0.7434 0.1742 0.044 Uiso 1 1 calc R . . 
H4S2 H 0.3454 0.6770 0.2121 0.044 Uiso 1 1 calc R . . 
C5 C 0.97984(14) 0.63665(12) 0.59557(12) 0.0139(2) Uani 1 1 d . . . 
C6 C 1.34191(18) 0.72425(16) 0.49007(15) 0.0231(3) Uani 1 1 d . . . 
C11 C 0.79613(13) 0.91371(11) 0.73039(12) 0.0122(2) Uani 1 1 d . . . 
C12 C 0.73635(14) 0.98472(12) 0.65922(12) 0.0140(2) Uani 1 1 d . . . 
H12 H 0.7675 1.0081 0.6074 0.017 Uiso 1 1 calc R . . 
C13 C 0.63155(15) 1.02114(13) 0.66409(14) 0.0181(3) Uani 1 1 d . . . 
H13 H 0.5919 1.0698 0.6161 0.022 Uiso 1 1 calc R . . 
C14 C 0.58466(15) 0.98677(14) 0.73866(15) 0.0203(3) Uani 1 1 d . . . 
H14 H 0.5127 1.0115 0.7414 0.024 Uiso 1 1 calc R . . 
C15 C 0.64277(16) 0.91628(14) 0.80921(15) 0.0201(3) Uani 1 1 d . . . 
H15 H 0.6105 0.8929 0.8603 0.024 Uiso 1 1 calc R . . 
C16 C 0.74821(15) 0.87946(13) 0.80577(13) 0.0163(2) Uani 1 1 d . . . 
H16 H 0.7877 0.8312 0.8544 0.020 Uiso 1 1 calc R . . 
C21 C 0.98189(14) 0.79131(12) 0.84217(11) 0.0122(2) Uani 1 1 d . . . 
C22 C 0.94103(17) 0.67549(13) 0.82952(13) 0.0175(3) Uani 1 1 d . . . 
H22 H 0.8893 0.6294 0.7555 0.021 Uiso 1 1 calc R . . 
C23 C 0.9759(2) 0.62694(14) 0.92557(14) 0.0246(3) Uani 1 1 d . . . 
H23 H 0.9478 0.5478 0.9167 0.029 Uiso 1 1 calc R . . 
C24 C 1.05152(18) 0.69353(15) 1.03390(14) 0.0221(3) Uani 1 1 d . . . 
H24 H 1.0750 0.6602 1.0992 0.027 Uiso 1 1 calc R . . 
C25 C 1.09283(16) 0.80927(14) 1.04660(12) 0.0180(3) Uani 1 1 d . . . 
H25 H 1.1454 0.8549 1.1207 0.022 Uiso 1 1 calc R . . 
C26 C 1.05766(15) 0.85864(13) 0.95147(12) 0.0154(2) Uani 1 1 d . . . 
H26 H 1.0851 0.9380 0.9607 0.018 Uiso 1 1 calc R . . 
C30 C 1.21819(14) 0.84935(13) 0.76640(12) 0.0148(2) Uani 1 1 d . . . 
H30A H 1.1557 0.7938 0.7773 0.018 Uiso 1 1 calc R . . 
H30B H 1.2078 0.8258 0.6876 0.018 Uiso 1 1 calc R . . 
C31 C 1.06282(13) 0.98009(11) 0.76075(11) 0.0116(2) Uani 1 1 d . . . 
C32 C 1.04311(14) 1.08996(12) 0.77470(13) 0.0146(2) Uani 1 1 d . . . 
H32 H 0.9601 1.1005 0.7627 0.018 Uiso 1 1 calc R . . 
C33 C 1.14254(16) 1.18404(13) 0.80582(14) 0.0188(3) Uani 1 1 d . . . 
H33 H 1.1276 1.2581 0.8156 0.023 Uiso 1 1 calc R . . 
C34 C 1.26358(16) 1.16929(14) 0.82254(15) 0.0212(3) Uani 1 1 d . . . 
H34 H 1.3320 1.2331 0.8431 0.025 Uiso 1 1 calc R . . 
C35 C 1.28413(15) 1.06029(14) 0.80890(14) 0.0187(3) Uani 1 1 d . . . 
H35 H 1.3673 1.0509 0.8203 0.022 Uiso 1 1 calc R . . 
C36 C 1.18670(14) 0.96463(12) 0.77903(12) 0.0134(2) Uani 1 1 d . . . 
C101 C 1.36266(19) 0.86456(18) 0.96412(15) 0.0277(4) Uani 1 1 d . . . 
H10A H 1.3429 0.9373 0.9830 0.041 Uiso 1 1 calc R . . 
H10B H 1.4513 0.8649 1.0170 0.041 Uiso 1 1 calc R . . 
H10C H 1.3032 0.8035 0.9708 0.041 Uiso 1 1 calc R . . 
C102 C 1.37440(18) 0.73659(15) 0.81866(16) 0.0242(3) Uani 1 1 d . . . 
H10D H 1.4616 0.7342 0.8726 0.036 Uiso 1 1 calc R . . 
H10E H 1.3669 0.7248 0.7408 0.036 Uiso 1 1 calc R . . 
H10F H 1.3119 0.6768 0.8233 0.036 Uiso 1 1 calc R . . 
F1 F 1.35041(13) 0.82535(11) 0.54845(11) 0.0394(3) Uani 1 1 d . . . 
F2 F 1.38237(15) 0.65705(14) 0.56447(11) 0.0444(4) Uani 1 1 d . . . 
F3 F 1.42418(12) 0.73842(12) 0.44463(12) 0.0348(3) Uani 1 1 d . . . 
  
loop_ 
 _atom_site_aniso_label 
 _atom_site_aniso_U_11 
 _atom_site_aniso_U_22 
 _atom_site_aniso_U_33 
 _atom_site_aniso_U_23 
 _atom_site_aniso_U_13 
 _atom_site_aniso_U_12 
S1 0.01739(15) 0.01166(14) 0.02062(16) -0.00025(12) 0.00985(13) 0.00337(12) 
N1 0.0126(5) 0.0214(6) 0.0188(6) 0.0044(5) 0.0049(4) 0.0068(5) 
P1 0.01094(14) 0.00933(13) 0.01039(13) 0.00182(10) 0.00521(11) 0.00335(11) 
Re1 0.01112(2) 0.00963(2) 0.00970(2) 0.00179(1) 0.00469(2) 0.00415(1) 
O1 0.0265(6) 0.0200(5) 0.0171(5) -0.0009(4) 0.0076(4) 0.0082(5) 
O1S 0.0288(7) 0.0396(9) 0.0407(9) 0.0143(7) 0.0065(6) 0.0125(7) 
O2 0.0185(5) 0.0253(6) 0.0328(7) 0.0111(5) 0.0132(5) 0.0040(5) 
O3 0.0254(6) 0.0259(6) 0.0183(5) 0.0070(4) 0.0066(5) 0.0156(5) 
O4 0.0205(5) 0.0163(5) 0.0194(5) 0.0045(4) 0.0108(4) 0.0038(4) 
O5 0.0197(5) 0.0169(5) 0.0243(5) 0.0065(4) 0.0081(4) 0.0087(4) 
O6 0.0368(8) 0.0244(6) 0.0522(9) 0.0051(6) 0.0356(7) 0.0056(6) 
O7 0.0351(8) 0.0157(5) 0.0461(8) -0.0083(5) 0.0215(7) 0.0040(5) 
O8 0.0302(7) 0.0281(6) 0.0218(6) 0.0095(5) 0.0046(5) 0.0105(5) 
C1 0.0161(6) 0.0142(6) 0.0159(6) 0.0036(5) 0.0069(5) 0.0063(5) 
C1S 0.0444(13) 0.0429(13) 0.0433(13) 0.0251(11) 0.0146(11) 0.0083(11) 
C2 0.0162(6) 0.0152(6) 0.0164(6) 0.0037(5) 0.0062(5) 0.0056(5) 
C2S 0.0616(18) 0.0401(14) 0.0514(16) 0.0113(12) 0.0140(14) 0.0195(13) 
C3 0.0180(6) 0.0159(6) 0.0132(5) 0.0025(5) 0.0072(5) 0.0060(5) 
C3S 0.0536(15) 0.0529(15) 0.0336(11) 0.0151(10) 0.0167(11) 0.0292(13) 
C4 0.0163(6) 0.0131(5) 0.0114(5) 0.0025(4) 0.0062(5) 0.0057(5) 
C4S 0.0330(10) 0.0437(12) 0.0352(11) 0.0142(9) 0.0121(9) 0.0186(9) 
C5 0.0153(6) 0.0125(5) 0.0136(5) 0.0019(4) 0.0063(5) 0.0031(5) 
C6 0.0228(7) 0.0263(8) 0.0185(7) 0.0041(6) 0.0068(6) 0.0083(6) 
C11 0.0117(5) 0.0115(5) 0.0147(5) 0.0010(4) 0.0072(4) 0.0035(4) 
C12 0.0137(6) 0.0134(5) 0.0146(5) 0.0012(4) 0.0059(5) 0.0045(4) 
C13 0.0143(6) 0.0175(6) 0.0201(6) 0.0000(5) 0.0056(5) 0.0060(5) 
C14 0.0135(6) 0.0211(7) 0.0254(7) -0.0020(6) 0.0094(6) 0.0045(5) 
C15 0.0173(6) 0.0217(7) 0.0253(7) 0.0016(6) 0.0147(6) 0.0028(5) 
C16 0.0167(6) 0.0158(6) 0.0196(6) 0.0030(5) 0.0113(5) 0.0032(5) 
C21 0.0147(5) 0.0128(5) 0.0106(5) 0.0028(4) 0.0064(4) 0.0048(4) 
C22 0.0266(7) 0.0126(6) 0.0129(5) 0.0035(4) 0.0076(5) 0.0054(5) 
C23 0.0403(10) 0.0159(6) 0.0176(7) 0.0067(5) 0.0115(7) 0.0077(7) 
C24 0.0317(9) 0.0230(7) 0.0141(6) 0.0082(5) 0.0097(6) 0.0106(6) 
C25 0.0194(7) 0.0233(7) 0.0108(5) 0.0024(5) 0.0063(5) 0.0054(5) 
C26 0.0158(6) 0.0166(6) 0.0128(5) 0.0012(5) 0.0063(5) 0.0025(5) 
C30 0.0135(6) 0.0164(6) 0.0138(5) 0.0012(4) 0.0051(5) 0.0054(5) 
C31 0.0123(5) 0.0113(5) 0.0117(5) 0.0022(4) 0.0059(4) 0.0025(4) 
C32 0.0158(6) 0.0121(5) 0.0176(6) 0.0034(4) 0.0087(5) 0.0038(5) 
C33 0.0192(7) 0.0126(6) 0.0246(7) 0.0019(5) 0.0105(6) 0.0024(5) 
C34 0.0176(7) 0.0164(6) 0.0283(8) 0.0020(6) 0.0112(6) -0.0004(5) 
C35 0.0137(6) 0.0188(6) 0.0239(7) 0.0017(5) 0.0098(5) 0.0023(5) 
C36 0.0130(5) 0.0150(6) 0.0134(5) 0.0021(4) 0.0067(4) 0.0042(4) 
C101 0.0241(8) 0.0373(10) 0.0157(7) 0.0041(6) 0.0023(6) 0.0107(7) 
C102 0.0222(8) 0.0246(8) 0.0301(8) 0.0091(6) 0.0120(7) 0.0134(6) 
F1 0.0358(7) 0.0331(6) 0.0299(6) -0.0144(5) 0.0046(5) 0.0000(5) 
F2 0.0505(8) 0.0619(10) 0.0273(6) 0.0237(6) 0.0129(6) 0.0322(7) 
F3 0.0206(5) 0.0454(7) 0.0417(7) 0.0121(6) 0.0156(5) 0.0085(5) 
  
_geom_special_details 
; 
 All esds (except the esd in the dihedral angle between two l.s. planes) 
 are estimated using the full covariance matrix.  The cell esds are taken 
 into account individually in the estimation of esds in distances, angles 
 and torsion angles; correlations between esds in cell parameters are only 
 used when they are defined by crystal symmetry.  An approximate (isotropic) 
 treatment of cell esds is used for estimating esds involving l.s. planes. 
; 
  
loop_ 
 _geom_bond_atom_site_label_1 
 _geom_bond_atom_site_label_2 
 _geom_bond_distance 
 _geom_bond_site_symmetry_2 
 _geom_bond_publ_flag 
S1 O6 1.4377(14) . ? 
S1 O7 1.4388(13) . ? 
S1 O8 1.4388(14) . ? 
S1 C6 1.8181(19) . ? 
N1 C101 1.459(2) . ? 
N1 C102 1.460(2) . ? 
N1 C30 1.4639(19) . ? 
P1 C21 1.8190(14) . ? 
P1 C11 1.8294(14) . ? 
P1 C31 1.8358(14) . ? 
P1 Re1 2.5016(4) . ? 
Re1 C1 1.9866(15) . ? 
Re1 C3 2.0023(15) . ? 
Re1 C4 2.0127(15) . ? 
Re1 C2 2.0217(16) . ? 
Re1 C5 2.0331(14) . ? 
O1 C1 1.1324(18) . ? 
O1S C1S 1.423(3) . ? 
O1S C4S 1.428(3) . ? 
O2 C2 1.126(2) . ? 
O3 C3 1.1339(18) . ? 
O4 C4 1.1289(19) . ? 
O5 C5 1.1263(18) . ? 
C1S C2S 1.517(4) . ? 
C2S C3S 1.530(4) . ? 
C3S C4S 1.510(4) . ? 
C6 F3 1.330(2) . ? 
C6 F2 1.337(2) . ? 
C6 F1 1.337(2) . ? 
C11 C12 1.400(2) . ? 
C11 C16 1.402(2) . ? 
C12 C13 1.390(2) . ? 
C13 C14 1.386(2) . ? 
C14 C15 1.385(2) . ? 
C15 C16 1.393(2) . ? 
C21 C22 1.390(2) . ? 
C21 C26 1.3986(19) . ? 
C22 C23 1.395(2) . ? 
C23 C24 1.386(2) . ? 
C24 C25 1.390(2) . ? 
C25 C26 1.390(2) . ? 
C30 C36 1.516(2) . ? 
C31 C32 1.3989(19) . ? 
C31 C36 1.416(2) . ? 
C32 C33 1.390(2) . ? 
C33 C34 1.386(2) . ? 
C34 C35 1.392(2) . ? 
C35 C36 1.392(2) . ? 
  
loop_ 
 _geom_angle_atom_site_label_1 
 _geom_angle_atom_site_label_2 
 _geom_angle_atom_site_label_3 
 _geom_angle 
 _geom_angle_site_symmetry_1 
 _geom_angle_site_symmetry_3 
 _geom_angle_publ_flag 
O6 S1 O7 115.25(9) . . ? 
O6 S1 O8 115.28(9) . . ? 
O7 S1 O8 115.33(9) . . ? 
O6 S1 C6 102.48(9) . . ? 
O7 S1 C6 102.81(9) . . ? 
O8 S1 C6 102.90(9) . . ? 
C101 N1 C102 109.16(14) . . ? 
C101 N1 C30 110.78(13) . . ? 
C102 N1 C30 109.11(13) . . ? 
C21 P1 C11 101.73(6) . . ? 
C21 P1 C31 102.89(7) . . ? 
C11 P1 C31 107.22(6) . . ? 
C21 P1 Re1 117.48(5) . . ? 
C11 P1 Re1 111.34(5) . . ? 
C31 P1 Re1 114.87(4) . . ? 
C1 Re1 C3 88.72(6) . . ? 
C1 Re1 C4 90.27(6) . . ? 
C3 Re1 C4 89.34(6) . . ? 
C1 Re1 C2 91.20(6) . . ? 
C3 Re1 C2 86.86(6) . . ? 
C4 Re1 C2 175.89(6) . . ? 
C1 Re1 C5 87.25(6) . . ? 
C3 Re1 C5 175.90(6) . . ? 
C4 Re1 C5 91.41(6) . . ? 
C2 Re1 C5 92.50(6) . . ? 
C1 Re1 P1 178.25(4) . . ? 
C3 Re1 P1 92.96(4) . . ? 
C4 Re1 P1 89.25(4) . . ? 
C2 Re1 P1 89.39(4) . . ? 
C5 Re1 P1 91.09(4) . . ? 
C1S O1S C4S 104.33(18) . . ? 
O1 C1 Re1 178.93(14) . . ? 
O1S C1S C2S 105.9(2) . . ? 
O2 C2 Re1 175.99(14) . . ? 
C1S C2S C3S 103.2(2) . . ? 
O3 C3 Re1 176.94(13) . . ? 
C4S C3S C2S 104.4(2) . . ? 
O4 C4 Re1 176.54(12) . . ? 
O1S C4S C3S 105.16(19) . . ? 
O5 C5 Re1 178.24(13) . . ? 
F3 C6 F2 106.96(15) . . ? 
F3 C6 F1 107.57(16) . . ? 
F2 C6 F1 108.12(16) . . ? 
F3 C6 S1 112.39(13) . . ? 
F2 C6 S1 111.36(14) . . ? 
F1 C6 S1 110.25(12) . . ? 
C12 C11 C16 119.07(13) . . ? 
C12 C11 P1 120.87(11) . . ? 
C16 C11 P1 119.95(11) . . ? 
C13 C12 C11 120.24(14) . . ? 
C14 C13 C12 120.34(15) . . ? 
C15 C14 C13 119.92(14) . . ? 
C14 C15 C16 120.46(15) . . ? 
C15 C16 C11 119.97(15) . . ? 
C22 C21 C26 119.69(13) . . ? 
C22 C21 P1 120.95(11) . . ? 
C26 C21 P1 119.20(11) . . ? 
C21 C22 C23 119.97(14) . . ? 
C24 C23 C22 120.38(16) . . ? 
C23 C24 C25 119.69(15) . . ? 
C24 C25 C26 120.38(14) . . ? 
C25 C26 C21 119.89(14) . . ? 
N1 C30 C36 113.63(12) . . ? 
C32 C31 C36 119.25(13) . . ? 
C32 C31 P1 119.65(11) . . ? 
C36 C31 P1 121.10(10) . . ? 
C33 C32 C31 121.31(14) . . ? 
C34 C33 C32 119.63(14) . . ? 
C33 C34 C35 119.47(15) . . ? 
C36 C35 C34 122.10(14) . . ? 
C35 C36 C31 118.22(13) . . ? 
C35 C36 C30 118.37(13) . . ? 
C31 C36 C30 123.40(13) . . ? 
  
_diffrn_measured_fraction_theta_max    1.000 
_diffrn_reflns_theta_full              39.39 
_diffrn_measured_fraction_theta_full   1.000 
_refine_diff_density_max    1.979 
_refine_diff_density_min   -3.410 
_refine_diff_density_rms    0.145 
 
#===END

data_3 
  
_audit_creation_method            SHELXL-97 
_chemical_name_systematic 
; 
 ? 
; 
_chemical_name_common             ? 
_chemical_melting_point           ? 
_chemical_formula_moiety          ? 
_chemical_formula_sum 
 'C22.67 H21.67 B F4 N O6.17 P Re' 
_chemical_formula_weight          710.72 
  
loop_ 
 _atom_type_symbol 
 _atom_type_description 
 _atom_type_scat_dispersion_real 
 _atom_type_scat_dispersion_imag 
 _atom_type_scat_source 
 'C'  'C'   0.0033   0.0016 
 'International Tables Vol C Tables 4.2.6.8 and 6.1.1.4' 
 'H'  'H'   0.0000   0.0000 
 'International Tables Vol C Tables 4.2.6.8 and 6.1.1.4' 
 'B'  'B'   0.0013   0.0007 
 'International Tables Vol C Tables 4.2.6.8 and 6.1.1.4' 
 'N'  'N'   0.0061   0.0033 
 'International Tables Vol C Tables 4.2.6.8 and 6.1.1.4' 
 'O'  'O'   0.0106   0.0060 
 'International Tables Vol C Tables 4.2.6.8 and 6.1.1.4' 
 'F'  'F'   0.0171   0.0103 
 'International Tables Vol C Tables 4.2.6.8 and 6.1.1.4' 
 'P'  'P'   0.1023   0.0942 
 'International Tables Vol C Tables 4.2.6.8 and 6.1.1.4' 
 'Re'  'Re'  -1.0185   7.2310 
 'International Tables Vol C Tables 4.2.6.8 and 6.1.1.4' 
  
_symmetry_cell_setting            Monoclinic 
_symmetry_space_group_name_H-M    C2/c 
  
loop_ 
 _symmetry_equiv_pos_as_xyz 
 'x, y, z' 
 '-x, y, -z+1/2' 
 'x+1/2, y+1/2, z' 
 '-x+1/2, y+1/2, -z+1/2' 
 '-x, -y, -z' 
 'x, -y, z-1/2' 
 '-x+1/2, -y+1/2, -z' 
 'x+1/2, -y+1/2, z-1/2' 
  
_cell_length_a                    40.9058(18) 
_cell_length_b                    10.1635(4) 
_cell_length_c                    37.0735(16) 
_cell_angle_alpha                 90.00 
_cell_angle_beta                  92.189(2) 
_cell_angle_gamma                 90.00 
_cell_volume                      15401.9(11) 
_cell_formula_units_Z             24 
_cell_measurement_temperature     296(2) 
_cell_measurement_reflns_used     9888 
_cell_measurement_theta_min       2.24 
_cell_measurement_theta_max       28.12 
  
_exptl_crystal_description        blade 
_exptl_crystal_colour             colourless 
_exptl_crystal_size_max           0.38 
_exptl_crystal_size_mid           0.10 
_exptl_crystal_size_min           0.05 
_exptl_crystal_density_meas       ? 
_exptl_crystal_density_diffrn     1.839 
_exptl_crystal_density_method     'not measured' 
_exptl_crystal_F_000              8280 
_exptl_absorpt_coefficient_mu     4.864 
_exptl_absorpt_correction_type    multi-scan 
_exptl_absorpt_correction_T_min   0.2567 
_exptl_absorpt_correction_T_max   0.8001 
_exptl_absorpt_process_details    sadabs 
  
_exptl_special_details 
; 
 ? 
; 
  
_diffrn_ambient_temperature       296(2) 
_diffrn_radiation_wavelength      0.71073 
_diffrn_radiation_type            MoK\a 
_diffrn_radiation_source          'fine-focus sealed tube' 
_diffrn_radiation_monochromator   graphite 
_diffrn_measurement_device_type   'Bruker APEX-II CCD' 
_diffrn_measurement_method        '\f and \w scans' 
_diffrn_detector_area_resol_mean  ? 
_diffrn_reflns_number             179498 
_diffrn_reflns_av_R_equivalents   0.0629 
_diffrn_reflns_av_sigmaI/netI     0.0393 
_diffrn_reflns_limit_h_min        -54 
_diffrn_reflns_limit_h_max        54 
_diffrn_reflns_limit_k_min        -13 
_diffrn_reflns_limit_k_max        13 
_diffrn_reflns_limit_l_min        -49 
_diffrn_reflns_limit_l_max        49 
_diffrn_reflns_theta_min          1.46 
_diffrn_reflns_theta_max          28.28 
_reflns_number_total              19055 
_reflns_number_gt                 15703 
_reflns_threshold_expression      >2sigma(I) 
  
_computing_data_collection        'Bruker APEX2' 
_computing_cell_refinement        'Bruker SAINT' 
_computing_data_reduction         'Bruker SAINT' 
_computing_structure_solution     'SHELXS-97 (Sheldrick, 2008)' 
_computing_structure_refinement   'SHELXL-97 (Sheldrick, 2008)' 
_computing_molecular_graphics     'Bruker SHELXTL' 
_computing_publication_material   'Bruker SHELXTL' 
  
_refine_special_details 
; 
 Refinement of F^2^ against ALL reflections.  The weighted R-factor wR and 
 goodness of fit S are based on F^2^, conventional R-factors R are based 
 on F, with F set to zero for negative F^2^. The threshold expression of 
 F^2^ > 2sigma(F^2^) is used only for calculating R-factors(gt) etc. and is 
 not relevant to the choice of reflections for refinement.  R-factors based 
 on F^2^ are statistically about twice as large as those based on F, and R- 
 factors based on ALL data will be even larger. 
; 
  
_refine_ls_structure_factor_coef  Fsqd 
_refine_ls_matrix_type            full 
_refine_ls_weighting_scheme       calc 
_refine_ls_weighting_details 
 'calc w=1/[\s^2^(Fo^2^)+(0.0192P)^2^+207.3896P] where P=(Fo^2^+2Fc^2^)/3' 
_atom_sites_solution_primary      direct 
_atom_sites_solution_secondary    difmap 
_atom_sites_solution_hydrogens    geom 
_refine_ls_hydrogen_treatment     constr 
_refine_ls_extinction_method      none 
_refine_ls_extinction_coef        ? 
_refine_ls_number_reflns          19055 
_refine_ls_number_parameters      1004 
_refine_ls_number_restraints      38 
_refine_ls_R_factor_all           0.0552 
_refine_ls_R_factor_gt            0.0394 
_refine_ls_wR_factor_ref          0.0843 
_refine_ls_wR_factor_gt           0.0779 
_refine_ls_goodness_of_fit_ref    1.182 
_refine_ls_restrained_S_all       1.181 
_refine_ls_shift/su_max           0.005 
_refine_ls_shift/su_mean          0.000 
  
loop_ 
 _atom_site_label 
 _atom_site_type_symbol 
 _atom_site_fract_x 
 _atom_site_fract_y 
 _atom_site_fract_z 
 _atom_site_U_iso_or_equiv 
 _atom_site_adp_type 
 _atom_site_occupancy 
 _atom_site_symmetry_multiplicity 
 _atom_site_calc_flag 
 _atom_site_refinement_flags 
 _atom_site_disorder_assembly 
 _atom_site_disorder_group 
Re1 Re 0.842265(5) 0.328606(19) 0.206037(5) 0.01129(5) Uani 1 1 d . . . 
Re2 Re 0.480641(5) 1.74560(2) 0.366151(5) 0.01368(5) Uani 1 1 d . . . 
Re3 Re 0.333326(5) 0.85223(2) 0.433259(5) 0.01403(5) Uani 1 1 d . . . 
P1 P 0.85223(3) 0.56494(13) 0.19603(3) 0.0116(3) Uani 1 1 d . . . 
P2 P 0.51490(3) 1.61187(13) 0.40841(3) 0.0127(3) Uani 1 1 d . . . 
P3 P 0.31106(3) 1.07928(14) 0.43549(4) 0.0148(3) Uani 1 1 d . . . 
F1 F 0.37857(11) 0.8211(4) 0.30991(14) 0.0533(13) Uani 1 1 d . . . 
F2 F 0.36142(10) 0.6711(5) 0.34993(10) 0.0446(11) Uani 1 1 d . . . 
F3 F 0.35486(9) 0.6329(4) 0.29012(10) 0.0306(8) Uani 1 1 d . . . 
F4 F 0.40579(8) 0.6265(4) 0.31719(9) 0.0292(8) Uani 1 1 d . . . 
F5 F 0.74377(12) 0.6068(4) 0.09385(13) 0.0534(13) Uani 1 1 d . . . 
F6 F 0.78744(12) 0.4799(5) 0.10966(11) 0.0556(12) Uani 1 1 d . . . 
F7 F 0.78932(11) 0.6082(4) 0.06035(11) 0.0435(10) Uani 1 1 d . . . 
F8 F 0.75652(10) 0.4292(4) 0.06025(11) 0.0426(10) Uani 1 1 d . . . 
F9 F 0.42323(10) 1.7627(4) 0.46627(10) 0.0392(10) Uani 1 1 d . . . 
F10 F 0.43876(10) 1.5612(4) 0.48738(11) 0.0388(10) Uani 1 1 d . . . 
F11 F 0.39367(9) 1.6569(4) 0.50874(10) 0.0320(8) Uani 1 1 d . . . 
F12 F 0.44405(9) 1.7395(4) 0.52365(9) 0.0302(8) Uani 1 1 d . . . 
N1 N 0.78828(11) 0.6218(4) 0.21066(12) 0.0142(9) Uani 1 1 d . . . 
N2 N 0.47381(10) 1.3990(4) 0.40218(11) 0.0130(9) Uani 1 1 d . . . 
N3 N 0.24891(11) 1.0132(5) 0.41236(12) 0.0190(10) Uani 1 1 d . . . 
O1 O 0.86405(12) 0.2715(4) 0.12758(11) 0.0347(11) Uani 1 1 d . . . 
O1S O 0.5081(3) 1.0748(12) 0.2634(3) 0.041(2) Uani 0.50 1 d PU A -1 
O2 O 0.91431(10) 0.2761(4) 0.23358(13) 0.0309(10) Uani 1 1 d . . . 
O3 O 0.81611(10) 0.4002(4) 0.28229(10) 0.0220(9) Uani 1 1 d . . . 
O4 O 0.82763(9) 0.0322(4) 0.21972(11) 0.0208(8) Uani 1 1 d U . . 
O5 O 0.76967(10) 0.3536(4) 0.17552(11) 0.0211(8) Uani 1 1 d . . . 
O6 O 0.73397(9) 0.6854(4) 0.25396(11) 0.0233(9) Uani 1 1 d . . . 
O7 O 0.47973(12) 1.9707(4) 0.42463(11) 0.0338(11) Uani 1 1 d . . . 
O8 O 0.41756(10) 1.6200(4) 0.39831(11) 0.0263(9) Uani 1 1 d . . . 
O9 O 0.54525(11) 1.8584(4) 0.33647(12) 0.0332(11) Uani 1 1 d . . . 
O10 O 0.44130(11) 1.9260(4) 0.31210(11) 0.0267(9) Uani 1 1 d . . . 
O11 O 0.47704(10) 1.5254(4) 0.30716(11) 0.0255(9) Uani 1 1 d . . . 
O12 O 0.44493(10) 1.1658(4) 0.37151(11) 0.0224(9) Uani 1 1 d . . . 
O13 O 0.19510(10) 0.9553(4) 0.36337(13) 0.0315(10) Uani 1 1 d . . . 
O101 O 0.37175(13) 0.9236(5) 0.50511(12) 0.0399(12) Uani 1 1 d . . . 
O102 O 0.27548(14) 0.7464(6) 0.47788(16) 0.0584(17) Uani 1 1 d . . . 
O103 O 0.35792(11) 0.5608(4) 0.43505(11) 0.0280(10) Uani 1 1 d . . . 
O104 O 0.39686(10) 0.9330(4) 0.39433(13) 0.0304(10) Uani 1 1 d . . . 
O105 O 0.29518(10) 0.8001(4) 0.35944(11) 0.0256(9) Uani 1 1 d . . . 
C1 C 0.85614(15) 0.2918(5) 0.15570(15) 0.0216(12) Uani 1 1 d . . . 
C1S C 0.5266(4) 1.2926(17) 0.2768(4) 0.046(4) Uani 0.50 1 d PU A -1 
H1S1 H 0.5248 1.3851 0.2718 0.070 Uiso 0.50 1 calc PR A -1 
H1S2 H 0.5484 1.2635 0.2724 0.070 Uiso 0.50 1 calc PR A -1 
H1S3 H 0.5218 1.2766 0.3016 0.070 Uiso 0.50 1 calc PR A -1 
C2 C 0.88818(13) 0.2984(5) 0.22417(15) 0.0175(11) Uani 1 1 d . . . 
C2S C 0.5000 1.2103(13) 0.2500 0.057(3) Uani 1 2 d SU . . 
H2S1 H 0.4775 1.2344 0.2542 0.069 Uiso 0.50 1 calc PR A . 
H2S2 H 0.5044 1.2211 0.2247 0.069 Uiso 0.50 1 calc PR . . 
C3 C 0.82640(12) 0.3739(5) 0.25537(14) 0.0131(10) Uani 1 1 d . . . 
C3S C 0.4884(4) 0.9905(18) 0.2409(4) 0.039(3) Uani 0.50 1 d PU A -1 
H3S1 H 0.4915 1.0101 0.2156 0.047 Uiso 0.50 1 calc PR A -1 
H3S2 H 0.4655 1.0010 0.2459 0.047 Uiso 0.50 1 calc PR A -1 
C4 C 0.83258(13) 0.1375(5) 0.21494(14) 0.0160(8) Uani 1 1 d U . . 
C4S C 0.5000 0.8493(12) 0.2500 0.043(2) Uani 1 2 d SU . . 
H4SA H 0.4874 0.7875 0.2357 0.065 Uiso 0.50 1 calc PR A -1 
H4SB H 0.4971 0.8320 0.2751 0.065 Uiso 0.50 1 calc PR A -1 
H4SC H 0.5227 0.8406 0.2449 0.065 Uiso 0.50 1 calc PR A -1 
C5 C 0.79557(14) 0.3503(5) 0.18682(14) 0.0162(11) Uani 1 1 d . . . 
C6 C 0.48010(15) 1.8889(6) 0.40412(15) 0.0239(13) Uani 1 1 d . . . 
C7 C 0.44023(14) 1.6647(6) 0.38686(15) 0.0204(12) Uani 1 1 d . . . 
C8 C 0.52168(15) 1.8190(5) 0.34736(15) 0.0196(12) Uani 1 1 d . . . 
C9 C 0.45419(13) 1.8598(5) 0.33254(14) 0.0160(8) Uani 1 1 d . . . 
C10 C 0.47870(13) 1.6035(5) 0.32878(14) 0.0168(11) Uani 1 1 d . . . 
C11 C 0.87681(14) 0.5986(5) 0.15744(14) 0.0179(11) Uani 1 1 d . . . 
C12 C 0.91022(14) 0.6161(5) 0.16229(17) 0.0240(13) Uani 1 1 d . . . 
H12 H 0.9198 0.6156 0.1855 0.029 Uiso 1 1 calc R . . 
C13 C 0.92943(18) 0.6342(6) 0.1330(2) 0.0364(17) Uani 1 1 d . . . 
H13 H 0.9519 0.6447 0.1365 0.044 Uiso 1 1 calc R . . 
C14 C 0.9157(2) 0.6368(6) 0.0986(2) 0.041(2) Uani 1 1 d . . . 
H14 H 0.9288 0.6511 0.0790 0.050 Uiso 1 1 calc R . . 
C15 C 0.8828(2) 0.6181(6) 0.09352(18) 0.043(2) Uani 1 1 d . . . 
H15 H 0.8735 0.6197 0.0702 0.052 Uiso 1 1 calc R . . 
C16 C 0.86290(18) 0.5967(6) 0.12236(16) 0.0285(14) Uani 1 1 d . . . 
H16 H 0.8406 0.5814 0.1185 0.034 Uiso 1 1 calc R . . 
C21 C 0.87344(13) 0.6586(5) 0.23169(14) 0.0144(10) Uani 1 1 d . . . 
C22 C 0.87517(13) 0.7959(5) 0.22715(14) 0.0160(11) Uani 1 1 d . . . 
H22 H 0.8662 0.8346 0.2063 0.019 Uiso 1 1 calc R . . 
C23 C 0.89018(14) 0.8737(5) 0.25370(15) 0.0201(12) Uani 1 1 d . . . 
H23 H 0.8909 0.9645 0.2508 0.024 Uiso 1 1 calc R . . 
C24 C 0.90407(14) 0.8170(5) 0.28449(16) 0.0218(12) Uani 1 1 d . . . 
H24 H 0.9139 0.8695 0.3023 0.026 Uiso 1 1 calc R . . 
C25 C 0.90327(14) 0.6814(5) 0.28868(15) 0.0209(12) Uani 1 1 d . . . 
H25 H 0.9132 0.6430 0.3091 0.025 Uiso 1 1 calc R . . 
C26 C 0.88769(13) 0.6021(5) 0.26256(14) 0.0170(11) Uani 1 1 d . . . 
H26 H 0.8868 0.5115 0.2658 0.020 Uiso 1 1 calc R . . 
C30 C 0.81378(13) 0.6526(5) 0.18532(13) 0.0147(10) Uani 1 1 d . . . 
H30A H 0.8179 0.7466 0.1858 0.018 Uiso 1 1 calc R . . 
H30B H 0.8061 0.6293 0.1611 0.018 Uiso 1 1 calc R . . 
C31 C 0.75577(13) 0.6527(5) 0.19456(15) 0.0189(11) Uani 1 1 d . . . 
H31A H 0.7524 0.6046 0.1721 0.023 Uiso 1 1 calc R . . 
H31B H 0.7543 0.7460 0.1892 0.023 Uiso 1 1 calc R . . 
C32 C 0.72972(14) 0.6152(6) 0.22058(16) 0.0223(12) Uani 1 1 d . . . 
H32A H 0.7083 0.6348 0.2098 0.027 Uiso 1 1 calc R . . 
H32B H 0.7308 0.5214 0.2252 0.027 Uiso 1 1 calc R . . 
C33 C 0.76545(14) 0.6554(6) 0.26973(16) 0.0243(13) Uani 1 1 d . . . 
H33A H 0.7666 0.5621 0.2751 0.029 Uiso 1 1 calc R . . 
H33B H 0.7685 0.7030 0.2923 0.029 Uiso 1 1 calc R . . 
C34 C 0.79241(14) 0.6916(6) 0.24497(14) 0.0202(12) Uani 1 1 d . . . 
H34A H 0.7921 0.7857 0.2407 0.024 Uiso 1 1 calc R . . 
H34B H 0.8134 0.6691 0.2563 0.024 Uiso 1 1 calc R . . 
C41 C 0.52930(13) 1.7161(5) 0.44556(13) 0.0139(10) Uani 1 1 d . . . 
C42 C 0.55681(14) 1.7939(5) 0.44116(15) 0.0190(11) Uani 1 1 d . . . 
H42 H 0.5696 1.7809 0.4213 0.023 Uiso 1 1 calc R . . 
C43 C 0.56525(15) 1.8905(6) 0.46614(16) 0.0237(13) Uani 1 1 d . . . 
H43 H 0.5839 1.9410 0.4632 0.028 Uiso 1 1 calc R . . 
C44 C 0.54592(15) 1.9121(6) 0.49547(16) 0.0247(13) Uani 1 1 d . . . 
H44 H 0.5513 1.9784 0.5119 0.030 Uiso 1 1 calc R . . 
C45 C 0.51845(15) 1.8344(5) 0.50019(14) 0.0211(12) Uani 1 1 d . . . 
H45 H 0.5056 1.8480 0.5200 0.025 Uiso 1 1 calc R . . 
C46 C 0.51015(14) 1.7365(5) 0.47538(14) 0.0179(11) Uani 1 1 d . . . 
H46 H 0.4918 1.6845 0.4786 0.022 Uiso 1 1 calc R . . 
C51 C 0.55263(13) 1.5454(5) 0.39152(14) 0.0154(11) Uani 1 1 d . . . 
C52 C 0.57639(13) 1.4975(5) 0.41617(15) 0.0178(11) Uani 1 1 d . . . 
H52 H 0.5723 1.4965 0.4407 0.021 Uiso 1 1 calc R . . 
C53 C 0.60577(14) 1.4520(5) 0.40448(16) 0.0207(12) Uani 1 1 d . . . 
H53 H 0.6215 1.4207 0.4212 0.025 Uiso 1 1 calc R . . 
C54 C 0.61225(14) 1.4521(6) 0.36817(17) 0.0232(12) Uani 1 1 d . . . 
H54 H 0.6323 1.4223 0.3605 0.028 Uiso 1 1 calc R . . 
C55 C 0.58884(14) 1.4966(6) 0.34323(16) 0.0225(12) Uani 1 1 d . . . 
H55 H 0.5930 1.4954 0.3187 0.027 Uiso 1 1 calc R . . 
C56 C 0.55925(14) 1.5431(5) 0.35484(15) 0.0181(11) Uani 1 1 d . . . 
H56 H 0.5436 1.5731 0.3380 0.022 Uiso 1 1 calc R . . 
C60 C 0.49328(13) 1.4728(5) 0.42904(14) 0.0145(10) Uani 1 1 d . . . 
H60A H 0.5091 1.4145 0.4408 0.017 Uiso 1 1 calc R . . 
H60B H 0.4791 1.5061 0.4473 0.017 Uiso 1 1 calc R . . 
C61 C 0.49337(13) 1.2986(5) 0.38429(15) 0.0174(11) Uani 1 1 d . . . 
H61A H 0.5021 1.2367 0.4021 0.021 Uiso 1 1 calc R . . 
H61B H 0.5116 1.3402 0.3727 0.021 Uiso 1 1 calc R . . 
C62 C 0.47218(14) 1.2261(6) 0.35626(15) 0.0223(12) Uani 1 1 d . . . 
H62A H 0.4646 1.2877 0.3378 0.027 Uiso 1 1 calc R . . 
H62B H 0.4852 1.1595 0.3448 0.027 Uiso 1 1 calc R . . 
C63 C 0.42585(14) 1.2625(6) 0.38924(16) 0.0232(12) Uani 1 1 d . . . 
H63A H 0.4072 1.2201 0.3998 0.028 Uiso 1 1 calc R . . 
H63B H 0.4176 1.3261 0.3716 0.028 Uiso 1 1 calc R . . 
C64 C 0.44577(14) 1.3327(6) 0.41843(14) 0.0193(11) Uani 1 1 d . . . 
H64A H 0.4323 1.3971 0.4301 0.023 Uiso 1 1 calc R . . 
H64B H 0.4536 1.2700 0.4365 0.023 Uiso 1 1 calc R . . 
C71 C 0.32750(14) 1.1712(5) 0.47427(14) 0.0172(11) Uani 1 1 d . . . 
C72 C 0.31508(15) 1.1476(6) 0.50816(15) 0.0251(13) Uani 1 1 d . . . 
H72 H 0.2974 1.0913 0.5105 0.030 Uiso 1 1 calc R . . 
C73 C 0.32916(16) 1.2080(6) 0.53832(16) 0.0274(14) Uani 1 1 d . . . 
H73 H 0.3210 1.1911 0.5610 0.033 Uiso 1 1 calc R . . 
C74 C 0.35518(16) 1.2932(6) 0.53511(16) 0.0281(14) Uani 1 1 d . . . 
H74 H 0.3645 1.3338 0.5555 0.034 Uiso 1 1 calc R . . 
C75 C 0.36737(15) 1.3179(6) 0.50173(16) 0.0270(14) Uani 1 1 d . . . 
H75 H 0.3849 1.3751 0.4996 0.032 Uiso 1 1 calc R . . 
C76 C 0.35357(14) 1.2579(5) 0.47130(15) 0.0215(12) Uani 1 1 d . . . 
H76 H 0.3618 1.2756 0.4488 0.026 Uiso 1 1 calc R . . 
C81 C 0.31773(12) 1.1867(5) 0.39695(14) 0.0143(10) Uani 1 1 d . . . 
C82 C 0.30752(14) 1.3196(6) 0.39944(15) 0.0204(12) Uani 1 1 d . . . 
H82 H 0.2983 1.3510 0.4203 0.025 Uiso 1 1 calc R . . 
C83 C 0.31152(15) 1.4022(6) 0.36992(17) 0.0256(13) Uani 1 1 d . . . 
H83 H 0.3054 1.4901 0.3713 0.031 Uiso 1 1 calc R . . 
C84 C 0.32448(15) 1.3550(7) 0.33858(17) 0.0293(14) Uani 1 1 d . . . 
H84 H 0.3271 1.4111 0.3191 0.035 Uiso 1 1 calc R . . 
C85 C 0.33358(15) 1.2241(6) 0.33623(16) 0.0253(13) Uani 1 1 d . . . 
H85 H 0.3419 1.1921 0.3149 0.030 Uiso 1 1 calc R . . 
C86 C 0.33034(14) 1.1408(6) 0.36530(15) 0.0220(12) Uani 1 1 d . . . 
H86 H 0.3367 1.0533 0.3636 0.026 Uiso 1 1 calc R . . 
C90 C 0.26651(14) 1.0841(6) 0.44125(15) 0.0206(12) Uani 1 1 d . . . 
H90A H 0.2616 1.0450 0.4643 0.025 Uiso 1 1 calc R . . 
H90B H 0.2592 1.1749 0.4414 0.025 Uiso 1 1 calc R . . 
C91 C 0.21900(15) 0.9497(7) 0.42472(17) 0.0295(14) Uani 1 1 d . . . 
H91A H 0.2040 1.0159 0.4331 0.035 Uiso 1 1 calc R . . 
H91B H 0.2244 0.8906 0.4446 0.035 Uiso 1 1 calc R . . 
C92 C 0.20304(17) 0.8734(7) 0.39360(19) 0.0346(16) Uani 1 1 d . . . 
H92A H 0.2178 0.8044 0.3863 0.042 Uiso 1 1 calc R . . 
H92B H 0.1832 0.8319 0.4017 0.042 Uiso 1 1 calc R . . 
C93 C 0.22389(15) 1.0178(6) 0.35191(17) 0.0263(13) Uani 1 1 d . . . 
H93A H 0.2184 1.0744 0.3315 0.032 Uiso 1 1 calc R . . 
H93B H 0.2391 0.9516 0.3441 0.032 Uiso 1 1 calc R . . 
C94 C 0.23988(14) 1.0983(6) 0.38171(16) 0.0233(12) Uani 1 1 d . . . 
H94A H 0.2593 1.1410 0.3730 0.028 Uiso 1 1 calc R . . 
H94B H 0.2249 1.1660 0.3893 0.028 Uiso 1 1 calc R . . 
C101 C 0.35823(16) 0.8930(6) 0.47953(16) 0.0255(13) Uani 1 1 d . . . 
C102 C 0.29553(15) 0.7876(6) 0.46105(17) 0.0286(14) Uani 1 1 d . . . 
C103 C 0.34956(13) 0.6665(6) 0.43418(15) 0.0185(11) Uani 1 1 d . . . 
C104 C 0.37321(13) 0.9052(5) 0.40757(15) 0.0177(11) Uani 1 1 d . . . 
C105 C 0.30832(13) 0.8191(5) 0.38630(14) 0.0168(11) Uani 1 1 d . . . 
B1 B 0.37516(16) 0.6863(6) 0.31715(17) 0.0204(13) Uani 1 1 d . . . 
B2 B 0.76895(19) 0.5319(7) 0.0805(2) 0.0290(16) Uani 1 1 d . . . 
B3 B 0.42479(17) 1.6807(7) 0.49654(18) 0.0235(14) Uani 1 1 d . . . 
  
loop_ 
 _atom_site_aniso_label 
 _atom_site_aniso_U_11 
 _atom_site_aniso_U_22 
 _atom_site_aniso_U_33 
 _atom_site_aniso_U_23 
 _atom_site_aniso_U_13 
 _atom_site_aniso_U_12 
Re1 0.01280(10) 0.00773(9) 0.01326(9) 0.00005(7) -0.00065(7) 0.00072(8) 
Re2 0.01828(11) 0.01007(9) 0.01246(9) -0.00097(7) -0.00231(7) 0.00112(8) 
Re3 0.01554(11) 0.01383(10) 0.01269(9) -0.00221(8) 0.00028(7) -0.00417(8) 
P1 0.0128(7) 0.0095(6) 0.0127(6) 0.0001(5) 0.0008(5) 0.0013(5) 
P2 0.0158(7) 0.0105(6) 0.0118(6) -0.0013(5) -0.0012(5) -0.0008(5) 
P3 0.0138(7) 0.0166(7) 0.0140(6) -0.0044(5) 0.0008(5) -0.0034(5) 
F1 0.045(3) 0.023(2) 0.090(4) 0.012(2) -0.024(2) -0.0088(19) 
F2 0.035(2) 0.076(3) 0.0226(19) -0.001(2) 0.0035(16) 0.015(2) 
F3 0.030(2) 0.029(2) 0.0310(19) -0.0046(15) -0.0102(15) 0.0037(16) 
F4 0.0179(18) 0.038(2) 0.0311(19) -0.0099(16) -0.0037(14) 0.0065(15) 
F5 0.060(3) 0.032(2) 0.071(3) -0.005(2) 0.040(3) 0.008(2) 
F6 0.063(3) 0.070(3) 0.034(2) 0.008(2) -0.004(2) -0.009(3) 
F7 0.052(3) 0.030(2) 0.050(3) 0.0002(19) 0.026(2) -0.0043(19) 
F8 0.034(2) 0.047(2) 0.048(2) -0.022(2) 0.0119(19) -0.0128(19) 
F9 0.043(2) 0.045(2) 0.029(2) 0.0143(18) -0.0041(17) -0.0071(19) 
F10 0.048(3) 0.025(2) 0.044(2) -0.0099(17) 0.0152(19) 0.0019(18) 
F11 0.0253(19) 0.031(2) 0.040(2) 0.0049(17) 0.0027(16) 0.0012(16) 
F12 0.031(2) 0.036(2) 0.0241(17) -0.0054(16) -0.0005(15) -0.0047(17) 
N1 0.016(2) 0.010(2) 0.017(2) -0.0005(17) 0.0011(17) 0.0018(17) 
N2 0.011(2) 0.013(2) 0.015(2) -0.0018(17) -0.0012(17) -0.0030(17) 
N3 0.016(2) 0.018(2) 0.023(2) -0.0031(19) -0.0006(19) -0.0037(19) 
O1 0.061(3) 0.022(2) 0.022(2) -0.0029(18) 0.011(2) 0.010(2) 
O1S 0.030(6) 0.061(6) 0.033(5) -0.001(5) -0.001(4) 0.009(5) 
O2 0.017(2) 0.029(2) 0.046(3) -0.005(2) -0.0040(19) 0.0044(19) 
O3 0.029(2) 0.018(2) 0.019(2) 0.0024(16) 0.0043(17) 0.0058(17) 
O4 0.015(2) 0.0127(19) 0.034(2) 0.0009(16) -0.0087(17) 0.0038(15) 
O5 0.020(2) 0.0139(19) 0.029(2) 0.0030(16) -0.0075(17) 0.0003(16) 
O6 0.013(2) 0.025(2) 0.032(2) -0.0062(18) 0.0024(16) 0.0048(17) 
O7 0.058(3) 0.018(2) 0.025(2) -0.0098(18) -0.011(2) 0.013(2) 
O8 0.020(2) 0.034(2) 0.024(2) 0.0054(18) -0.0005(17) 0.0029(19) 
O9 0.033(3) 0.029(2) 0.037(3) 0.004(2) 0.005(2) -0.013(2) 
O10 0.033(3) 0.019(2) 0.028(2) 0.0051(17) -0.0068(18) 0.0072(18) 
O11 0.032(2) 0.021(2) 0.024(2) -0.0089(17) -0.0014(18) -0.0012(18) 
O12 0.026(2) 0.0163(19) 0.025(2) -0.0017(16) 0.0001(17) -0.0074(17) 
O13 0.022(2) 0.026(2) 0.045(3) -0.001(2) -0.011(2) -0.0052(19) 
O101 0.063(3) 0.029(3) 0.026(2) -0.005(2) -0.020(2) 0.001(2) 
O102 0.063(4) 0.049(3) 0.067(4) -0.012(3) 0.047(3) -0.019(3) 
O103 0.041(3) 0.014(2) 0.029(2) 0.0031(17) 0.0003(19) -0.0026(19) 
O104 0.019(2) 0.023(2) 0.049(3) 0.009(2) 0.007(2) -0.0033(18) 
O105 0.023(2) 0.030(2) 0.024(2) -0.0096(18) -0.0047(17) -0.0004(18) 
C1 0.033(3) 0.010(2) 0.022(3) 0.000(2) 0.001(2) 0.003(2) 
C1S 0.031(8) 0.063(9) 0.047(9) -0.003(7) 0.020(6) 0.005(7) 
C2 0.016(3) 0.013(2) 0.024(3) -0.004(2) 0.001(2) 0.000(2) 
C2S 0.037(6) 0.057(6) 0.079(9) 0.000 0.016(6) 0.000 
C3 0.012(3) 0.007(2) 0.020(3) 0.0041(19) -0.002(2) 0.0015(19) 
C3S 0.023(7) 0.069(7) 0.026(7) 0.006(7) -0.001(5) -0.002(7) 
C4 0.0152(19) 0.0124(18) 0.0204(18) -0.0012(14) 0.0007(15) -0.0057(15) 
C4S 0.036(6) 0.066(6) 0.027(5) 0.000 0.005(4) 0.000 
C5 0.022(3) 0.006(2) 0.020(3) 0.0012(19) -0.002(2) -0.001(2) 
C6 0.032(3) 0.019(3) 0.020(3) 0.004(2) -0.007(2) 0.008(2) 
C7 0.022(3) 0.022(3) 0.017(3) 0.002(2) -0.001(2) 0.007(2) 
C8 0.027(3) 0.013(3) 0.019(3) -0.002(2) -0.001(2) -0.002(2) 
C9 0.0152(19) 0.0124(18) 0.0204(18) -0.0012(14) 0.0007(15) -0.0057(15) 
C10 0.018(3) 0.019(3) 0.013(2) 0.004(2) 0.000(2) -0.001(2) 
C11 0.027(3) 0.008(2) 0.019(3) 0.004(2) 0.012(2) 0.002(2) 
C12 0.021(3) 0.017(3) 0.036(3) 0.006(2) 0.014(3) 0.004(2) 
C13 0.038(4) 0.019(3) 0.055(5) 0.007(3) 0.030(3) 0.001(3) 
C14 0.067(5) 0.015(3) 0.046(4) 0.003(3) 0.046(4) 0.005(3) 
C15 0.089(7) 0.023(3) 0.018(3) 0.002(3) 0.017(4) 0.005(4) 
C16 0.046(4) 0.019(3) 0.021(3) -0.002(2) 0.007(3) 0.002(3) 
C21 0.013(3) 0.010(2) 0.021(3) 0.000(2) 0.004(2) -0.003(2) 
C22 0.016(3) 0.013(2) 0.019(3) 0.002(2) 0.001(2) 0.000(2) 
C23 0.023(3) 0.008(2) 0.029(3) -0.003(2) -0.002(2) 0.001(2) 
C24 0.022(3) 0.016(3) 0.027(3) -0.006(2) -0.004(2) -0.002(2) 
C25 0.023(3) 0.018(3) 0.021(3) -0.001(2) -0.009(2) 0.006(2) 
C26 0.020(3) 0.011(2) 0.019(3) 0.000(2) -0.001(2) 0.000(2) 
C30 0.017(3) 0.011(2) 0.015(2) 0.0035(19) -0.002(2) -0.004(2) 
C31 0.017(3) 0.015(3) 0.024(3) -0.002(2) -0.005(2) 0.004(2) 
C32 0.013(3) 0.016(3) 0.038(3) -0.004(2) -0.003(2) 0.002(2) 
C33 0.017(3) 0.031(3) 0.025(3) 0.001(3) 0.004(2) 0.007(3) 
C34 0.024(3) 0.018(3) 0.019(3) -0.002(2) 0.000(2) 0.000(2) 
C41 0.016(3) 0.010(2) 0.015(2) 0.0007(19) -0.006(2) 0.000(2) 
C42 0.021(3) 0.018(3) 0.018(3) -0.001(2) 0.000(2) -0.002(2) 
C43 0.026(3) 0.017(3) 0.028(3) -0.002(2) -0.005(2) -0.006(2) 
C44 0.035(4) 0.015(3) 0.023(3) -0.006(2) -0.011(3) 0.001(2) 
C45 0.031(3) 0.018(3) 0.014(2) -0.002(2) -0.004(2) 0.005(2) 
C46 0.019(3) 0.019(3) 0.016(2) -0.001(2) -0.002(2) 0.000(2) 
C51 0.020(3) 0.007(2) 0.019(3) -0.0035(19) 0.001(2) -0.004(2) 
C52 0.021(3) 0.012(2) 0.020(3) -0.002(2) 0.000(2) -0.004(2) 
C53 0.017(3) 0.012(3) 0.033(3) -0.002(2) -0.006(2) -0.002(2) 
C54 0.017(3) 0.017(3) 0.037(3) -0.005(2) 0.004(2) -0.001(2) 
C55 0.025(3) 0.020(3) 0.023(3) -0.003(2) 0.004(2) -0.001(2) 
C56 0.018(3) 0.014(3) 0.022(3) -0.001(2) 0.001(2) -0.001(2) 
C60 0.017(3) 0.011(2) 0.016(2) -0.0018(19) -0.001(2) -0.001(2) 
C61 0.015(3) 0.015(3) 0.022(3) -0.003(2) 0.001(2) -0.003(2) 
C62 0.024(3) 0.019(3) 0.025(3) -0.004(2) 0.001(2) -0.007(2) 
C63 0.020(3) 0.023(3) 0.026(3) 0.001(2) -0.001(2) -0.008(2) 
C64 0.021(3) 0.018(3) 0.019(3) 0.001(2) 0.001(2) -0.005(2) 
C71 0.022(3) 0.011(2) 0.018(3) -0.007(2) -0.001(2) -0.001(2) 
C72 0.031(3) 0.024(3) 0.020(3) -0.006(2) -0.001(2) -0.011(3) 
C73 0.033(4) 0.032(3) 0.018(3) -0.007(2) 0.003(2) -0.007(3) 
C74 0.036(4) 0.026(3) 0.022(3) -0.008(2) -0.008(3) -0.005(3) 
C75 0.026(3) 0.024(3) 0.030(3) -0.002(3) -0.011(3) -0.013(3) 
C76 0.026(3) 0.019(3) 0.020(3) 0.001(2) -0.003(2) -0.009(2) 
C81 0.006(2) 0.021(3) 0.016(2) 0.000(2) -0.0022(19) -0.005(2) 
C82 0.018(3) 0.021(3) 0.022(3) -0.003(2) -0.001(2) -0.002(2) 
C83 0.022(3) 0.020(3) 0.034(3) 0.005(2) -0.009(3) -0.005(2) 
C84 0.029(3) 0.035(4) 0.024(3) 0.010(3) -0.004(3) -0.004(3) 
C85 0.023(3) 0.034(3) 0.019(3) 0.002(2) -0.001(2) -0.001(3) 
C86 0.026(3) 0.023(3) 0.018(3) 0.002(2) -0.001(2) 0.003(2) 
C90 0.021(3) 0.020(3) 0.022(3) -0.006(2) 0.003(2) -0.001(2) 
C91 0.016(3) 0.039(4) 0.033(3) -0.002(3) 0.000(3) -0.010(3) 
C92 0.028(4) 0.033(4) 0.042(4) 0.003(3) -0.009(3) -0.012(3) 
C93 0.020(3) 0.026(3) 0.032(3) 0.003(3) -0.006(3) 0.001(3) 
C94 0.014(3) 0.023(3) 0.033(3) 0.000(2) -0.004(2) -0.002(2) 
C101 0.039(4) 0.016(3) 0.021(3) -0.003(2) -0.007(3) 0.003(3) 
C102 0.024(3) 0.030(3) 0.033(3) -0.015(3) 0.016(3) -0.008(3) 
C103 0.012(3) 0.022(3) 0.021(3) 0.000(2) -0.004(2) -0.010(2) 
C104 0.015(3) 0.013(3) 0.025(3) 0.002(2) -0.001(2) -0.002(2) 
C105 0.013(3) 0.017(3) 0.021(3) -0.003(2) 0.005(2) -0.001(2) 
B1 0.020(3) 0.019(3) 0.022(3) -0.001(2) -0.004(3) -0.001(3) 
B2 0.031(4) 0.026(4) 0.031(4) -0.004(3) 0.009(3) 0.000(3) 
B3 0.026(4) 0.024(3) 0.020(3) 0.002(3) 0.002(3) 0.002(3) 
  
_geom_special_details 
; 
 All esds (except the esd in the dihedral angle between two l.s. planes) 
 are estimated using the full covariance matrix.  The cell esds are taken 
 into account individually in the estimation of esds in distances, angles 
 and torsion angles; correlations between esds in cell parameters are only 
 used when they are defined by crystal symmetry.  An approximate (isotropic) 
 treatment of cell esds is used for estimating esds involving l.s. planes. 
; 
  
loop_ 
 _geom_bond_atom_site_label_1 
 _geom_bond_atom_site_label_2 
 _geom_bond_distance 
 _geom_bond_site_symmetry_2 
 _geom_bond_publ_flag 
Re1 C2 1.994(6) . ? 
Re1 C1 2.006(6) . ? 
Re1 C4 2.012(5) . ? 
Re1 C3 2.017(5) . ? 
Re1 C5 2.025(6) . ? 
Re1 P1 2.4667(13) . ? 
Re2 C8 1.987(6) . ? 
Re2 C9 1.992(5) . ? 
Re2 C10 2.001(5) . ? 
Re2 C7 2.024(6) . ? 
Re2 C6 2.026(6) . ? 
Re2 P2 2.4695(13) . ? 
Re3 C104 1.994(6) . ? 
Re3 C102 2.001(6) . ? 
Re3 C103 2.001(6) . ? 
Re3 C101 2.005(6) . ? 
Re3 C105 2.013(5) . ? 
Re3 P3 2.4834(14) . ? 
P1 C11 1.812(5) . ? 
P1 C21 1.822(5) . ? 
P1 C30 1.838(5) . ? 
P2 C51 1.818(6) . ? 
P2 C41 1.818(5) . ? 
P2 C60 1.849(5) . ? 
P3 C71 1.822(5) . ? 
P3 C81 1.827(5) . ? 
P3 C90 1.843(6) . ? 
F1 B1 1.404(8) . ? 
F2 B1 1.367(8) . ? 
F3 B1 1.387(7) . ? 
F4 B1 1.392(7) . ? 
F5 B2 1.388(8) . ? 
F6 B2 1.399(9) . ? 
F7 B2 1.379(8) . ? 
F8 B2 1.372(8) . ? 
F9 B3 1.397(7) . ? 
F10 B3 1.390(8) . ? 
F11 B3 1.388(8) . ? 
F12 B3 1.388(8) . ? 
N1 C34 1.461(7) . ? 
N1 C30 1.464(7) . ? 
N1 C31 1.470(7) . ? 
N2 C60 1.459(6) . ? 
N2 C61 1.470(7) . ? 
N2 C64 1.478(7) . ? 
N3 C90 1.458(7) . ? 
N3 C94 1.464(7) . ? 
N3 C91 1.472(7) . ? 
O1 C1 1.123(7) . ? 
O1S C3S 1.424(16) . ? 
O1S C2S 1.497(16) . ? 
O2 C2 1.135(7) . ? 
O3 C3 1.130(6) . ? 
O4 C4 1.104(6) . ? 
O5 C5 1.125(6) . ? 
O6 C33 1.426(7) . ? 
O6 C32 1.433(7) . ? 
O7 C6 1.127(7) . ? 
O8 C7 1.129(7) . ? 
O9 C8 1.133(7) . ? 
O10 C9 1.129(6) . ? 
O11 C10 1.129(6) . ? 
O12 C62 1.410(7) . ? 
O12 C63 1.430(7) . ? 
O13 C93 1.417(7) . ? 
O13 C92 1.424(8) . ? 
O101 C101 1.123(7) . ? 
O102 C102 1.130(7) . ? 
O103 C103 1.127(7) . ? 
O104 C104 1.137(7) . ? 
O105 C105 1.130(6) . ? 
C1S C2S 1.669(17) . ? 
C2S O1S 1.497(16) 2_655 ? 
C2S C1S 1.669(17) 2_655 ? 
C3S C4S 1.54(2) . ? 
C4S C3S 1.54(2) 2_655 ? 
C11 C12 1.383(8) . ? 
C11 C16 1.399(8) . ? 
C12 C13 1.378(8) . ? 
C13 C14 1.371(11) . ? 
C14 C15 1.368(11) . ? 
C15 C16 1.385(9) . ? 
C21 C26 1.388(7) . ? 
C21 C22 1.408(7) . ? 
C22 C23 1.387(7) . ? 
C23 C24 1.382(8) . ? 
C24 C25 1.387(8) . ? 
C25 C26 1.395(7) . ? 
C31 C32 1.513(8) . ? 
C33 C34 1.507(8) . ? 
C41 C42 1.390(8) . ? 
C41 C46 1.395(7) . ? 
C42 C43 1.384(8) . ? 
C43 C44 1.386(9) . ? 
C44 C45 1.390(9) . ? 
C45 C46 1.388(7) . ? 
C51 C52 1.396(8) . ? 
C51 C56 1.397(7) . ? 
C52 C53 1.374(8) . ? 
C53 C54 1.382(8) . ? 
C54 C55 1.382(8) . ? 
C55 C56 1.383(8) . ? 
C61 C62 1.518(7) . ? 
C63 C64 1.509(7) . ? 
C71 C76 1.390(8) . ? 
C71 C72 1.394(8) . ? 
C72 C73 1.382(8) . ? 
C73 C74 1.381(9) . ? 
C74 C75 1.375(9) . ? 
C75 C76 1.384(8) . ? 
C81 C86 1.381(8) . ? 
C81 C82 1.417(8) . ? 
C82 C83 1.394(8) . ? 
C83 C84 1.382(9) . ? 
C84 C85 1.386(9) . ? 
C85 C86 1.381(8) . ? 
C91 C92 1.517(9) . ? 
C93 C94 1.504(8) . ? 
  
loop_ 
 _geom_angle_atom_site_label_1 
 _geom_angle_atom_site_label_2 
 _geom_angle_atom_site_label_3 
 _geom_angle 
 _geom_angle_site_symmetry_1 
 _geom_angle_site_symmetry_3 
 _geom_angle_publ_flag 
C2 Re1 C1 89.4(2) . . ? 
C2 Re1 C4 89.1(2) . . ? 
C1 Re1 C4 92.1(2) . . ? 
C2 Re1 C3 93.5(2) . . ? 
C1 Re1 C3 176.5(2) . . ? 
C4 Re1 C3 90.0(2) . . ? 
C2 Re1 C5 177.3(2) . . ? 
C1 Re1 C5 89.4(2) . . ? 
C4 Re1 C5 88.5(2) . . ? 
C3 Re1 C5 87.8(2) . . ? 
C2 Re1 P1 92.38(16) . . ? 
C1 Re1 P1 89.27(16) . . ? 
C4 Re1 P1 177.94(16) . . ? 
C3 Re1 P1 88.56(14) . . ? 
C5 Re1 P1 90.02(14) . . ? 
C8 Re2 C9 90.5(2) . . ? 
C8 Re2 C10 92.3(2) . . ? 
C9 Re2 C10 88.9(2) . . ? 
C8 Re2 C7 177.1(2) . . ? 
C9 Re2 C7 92.4(2) . . ? 
C10 Re2 C7 87.6(2) . . ? 
C8 Re2 C6 90.3(2) . . ? 
C9 Re2 C6 89.7(2) . . ? 
C10 Re2 C6 177.1(2) . . ? 
C7 Re2 C6 89.9(2) . . ? 
C8 Re2 P2 87.85(16) . . ? 
C9 Re2 P2 177.63(15) . . ? 
C10 Re2 P2 92.78(15) . . ? 
C7 Re2 P2 89.30(16) . . ? 
C6 Re2 P2 88.62(16) . . ? 
C104 Re3 C102 175.3(3) . . ? 
C104 Re3 C103 89.2(2) . . ? 
C102 Re3 C103 86.8(2) . . ? 
C104 Re3 C101 87.4(2) . . ? 
C102 Re3 C101 90.3(3) . . ? 
C103 Re3 C101 91.3(2) . . ? 
C104 Re3 C105 91.7(2) . . ? 
C102 Re3 C105 90.8(2) . . ? 
C103 Re3 C105 90.8(2) . . ? 
C101 Re3 C105 177.7(2) . . ? 
C104 Re3 P3 94.17(16) . . ? 
C102 Re3 P3 89.79(19) . . ? 
C103 Re3 P3 176.33(16) . . ? 
C101 Re3 P3 87.38(17) . . ? 
C105 Re3 P3 90.53(16) . . ? 
C11 P1 C21 102.2(3) . . ? 
C11 P1 C30 103.5(2) . . ? 
C21 P1 C30 106.5(2) . . ? 
C11 P1 Re1 113.73(17) . . ? 
C21 P1 Re1 118.46(17) . . ? 
C30 P1 Re1 111.07(17) . . ? 
C51 P2 C41 102.9(2) . . ? 
C51 P2 C60 106.5(2) . . ? 
C41 P2 C60 106.2(2) . . ? 
C51 P2 Re2 117.04(18) . . ? 
C41 P2 Re2 108.64(17) . . ? 
C60 P2 Re2 114.48(17) . . ? 
C71 P3 C81 104.4(2) . . ? 
C71 P3 C90 103.4(3) . . ? 
C81 P3 C90 104.6(3) . . ? 
C71 P3 Re3 112.22(18) . . ? 
C81 P3 Re3 117.61(18) . . ? 
C90 P3 Re3 113.19(19) . . ? 
C34 N1 C30 113.2(4) . . ? 
C34 N1 C31 108.8(4) . . ? 
C30 N1 C31 110.4(4) . . ? 
C60 N2 C61 111.9(4) . . ? 
C60 N2 C64 111.6(4) . . ? 
C61 N2 C64 108.2(4) . . ? 
C90 N3 C94 112.4(4) . . ? 
C90 N3 C91 112.4(5) . . ? 
C94 N3 C91 108.2(5) . . ? 
C3S O1S C2S 104.2(8) . . ? 
C33 O6 C32 109.0(4) . . ? 
C62 O12 C63 109.8(4) . . ? 
C93 O13 C92 109.3(5) . . ? 
O1 C1 Re1 179.6(6) . . ? 
O2 C2 Re1 176.9(5) . . ? 
O1S C2S O1S 46.2(9) 2_655 . ? 
O1S C2S C1S 142.2(9) 2_655 . ? 
O1S C2S C1S 97.6(8) . . ? 
O1S C2S C1S 97.6(8) 2_655 2_655 ? 
O1S C2S C1S 142.2(9) . 2_655 ? 
C1S C2S C1S 119.8(14) . 2_655 ? 
O3 C3 Re1 176.8(5) . . ? 
O1S C3S C4S 105.6(9) . . ? 
O4 C4 Re1 179.2(5) . . ? 
C3S C4S C3S 43.4(12) . 2_655 ? 
O5 C5 Re1 175.4(5) . . ? 
O7 C6 Re2 178.5(5) . . ? 
O8 C7 Re2 179.6(6) . . ? 
O9 C8 Re2 178.6(5) . . ? 
O10 C9 Re2 174.8(5) . . ? 
O11 C10 Re2 178.1(5) . . ? 
C12 C11 C16 119.2(5) . . ? 
C12 C11 P1 119.8(4) . . ? 
C16 C11 P1 120.9(5) . . ? 
C13 C12 C11 120.3(6) . . ? 
C14 C13 C12 120.7(7) . . ? 
C15 C14 C13 119.4(6) . . ? 
C14 C15 C16 121.3(7) . . ? 
C15 C16 C11 119.0(7) . . ? 
C26 C21 C22 119.1(5) . . ? 
C26 C21 P1 123.7(4) . . ? 
C22 C21 P1 117.1(4) . . ? 
C23 C22 C21 120.2(5) . . ? 
C24 C23 C22 120.4(5) . . ? 
C23 C24 C25 119.8(5) . . ? 
C24 C25 C26 120.5(5) . . ? 
C21 C26 C25 120.0(5) . . ? 
N1 C30 P1 112.5(3) . . ? 
N1 C31 C32 109.6(4) . . ? 
O6 C32 C31 111.1(4) . . ? 
O6 C33 C34 111.6(5) . . ? 
N1 C34 C33 110.4(5) . . ? 
C42 C41 C46 119.4(5) . . ? 
C42 C41 P2 118.9(4) . . ? 
C46 C41 P2 120.8(4) . . ? 
C43 C42 C41 120.5(5) . . ? 
C42 C43 C44 120.1(6) . . ? 
C43 C44 C45 119.8(5) . . ? 
C46 C45 C44 120.2(5) . . ? 
C45 C46 C41 120.1(5) . . ? 
C52 C51 C56 118.4(5) . . ? 
C52 C51 P2 118.9(4) . . ? 
C56 C51 P2 122.7(4) . . ? 
C53 C52 C51 120.4(5) . . ? 
C52 C53 C54 120.7(5) . . ? 
C55 C54 C53 119.9(6) . . ? 
C54 C55 C56 119.7(5) . . ? 
C55 C56 C51 120.9(5) . . ? 
N2 C60 P2 111.6(3) . . ? 
N2 C61 C62 109.8(4) . . ? 
O12 C62 C61 112.1(5) . . ? 
O12 C63 C64 111.4(5) . . ? 
N2 C64 C63 109.2(4) . . ? 
C76 C71 C72 119.2(5) . . ? 
C76 C71 P3 121.6(4) . . ? 
C72 C71 P3 119.1(4) . . ? 
C73 C72 C71 119.9(6) . . ? 
C74 C73 C72 120.5(6) . . ? 
C75 C74 C73 119.9(5) . . ? 
C74 C75 C76 120.2(6) . . ? 
C75 C76 C71 120.3(5) . . ? 
C86 C81 C82 119.9(5) . . ? 
C86 C81 P3 122.3(4) . . ? 
C82 C81 P3 117.7(4) . . ? 
C83 C82 C81 118.6(5) . . ? 
C84 C83 C82 120.8(6) . . ? 
C83 C84 C85 119.9(6) . . ? 
C86 C85 C84 120.4(6) . . ? 
C85 C86 C81 120.4(6) . . ? 
N3 C90 P3 111.4(4) . . ? 
N3 C91 C92 109.0(5) . . ? 
O13 C92 C91 112.2(5) . . ? 
O13 C93 C94 111.5(5) . . ? 
N3 C94 C93 109.8(5) . . ? 
O101 C101 Re3 175.8(5) . . ? 
O102 C102 Re3 175.9(7) . . ? 
O103 C103 Re3 178.1(5) . . ? 
O104 C104 Re3 176.6(5) . . ? 
O105 C105 Re3 177.9(5) . . ? 
F2 B1 F3 110.1(5) . . ? 
F2 B1 F4 110.5(5) . . ? 
F3 B1 F4 110.1(5) . . ? 
F2 B1 F1 109.1(5) . . ? 
F3 B1 F1 107.7(5) . . ? 
F4 B1 F1 109.2(5) . . ? 
F8 B2 F7 110.5(6) . . ? 
F8 B2 F5 110.4(6) . . ? 
F7 B2 F5 110.9(6) . . ? 
F8 B2 F6 108.3(6) . . ? 
F7 B2 F6 108.1(6) . . ? 
F5 B2 F6 108.6(6) . . ? 
F12 B3 F11 110.0(5) . . ? 
F12 B3 F10 109.0(5) . . ? 
F11 B3 F10 108.6(5) . . ? 
F12 B3 F9 109.4(5) . . ? 
F11 B3 F9 110.6(5) . . ? 
F10 B3 F9 109.3(5) . . ? 
  
_diffrn_measured_fraction_theta_max    0.997 
_diffrn_reflns_theta_full              28.28 
_diffrn_measured_fraction_theta_full   0.997 
_refine_diff_density_max    2.936 
_refine_diff_density_min   -2.050 
_refine_diff_density_rms    0.173 

#===END
 
data_4 
  
_audit_creation_method            SHELXL-97 
_chemical_name_systematic 
; 
 ? 
; 
_chemical_name_common             ? 
_chemical_melting_point           ? 
_chemical_formula_moiety          ? 
_chemical_formula_sum 
 'C28 H26 B F4 N3 O5 P Re' 
_chemical_formula_weight          788.50 
  
loop_ 
 _atom_type_symbol 
 _atom_type_description 
 _atom_type_scat_dispersion_real 
 _atom_type_scat_dispersion_imag 
 _atom_type_scat_source 
 'C'  'C'   0.0033   0.0016 
 'International Tables Vol C Tables 4.2.6.8 and 6.1.1.4' 
 'H'  'H'   0.0000   0.0000 
 'International Tables Vol C Tables 4.2.6.8 and 6.1.1.4' 
 'B'  'B'   0.0013   0.0007 
 'International Tables Vol C Tables 4.2.6.8 and 6.1.1.4' 
 'N'  'N'   0.0061   0.0033 
 'International Tables Vol C Tables 4.2.6.8 and 6.1.1.4' 
 'O'  'O'   0.0106   0.0060 
 'International Tables Vol C Tables 4.2.6.8 and 6.1.1.4' 
 'F'  'F'   0.0171   0.0103 
 'International Tables Vol C Tables 4.2.6.8 and 6.1.1.4' 
 'P'  'P'   0.1023   0.0942 
 'International Tables Vol C Tables 4.2.6.8 and 6.1.1.4' 
 'Re'  'Re'  -1.0185   7.2310 
 'International Tables Vol C Tables 4.2.6.8 and 6.1.1.4' 
  
_symmetry_cell_setting            Cubic 
_symmetry_space_group_name_H-M    P-43n 
  
loop_ 
 _symmetry_equiv_pos_as_xyz 
 'x, y, z' 
 '-x, -y, z' 
 '-x, y, -z' 
 'x, -y, -z' 
 'z, x, y' 
 'z, -x, -y' 
 '-z, -x, y' 
 '-z, x, -y' 
 'y, z, x' 
 '-y, z, -x' 
 'y, -z, -x' 
 '-y, -z, x' 
 'y+1/2, x+1/2, z+1/2' 
 '-y+1/2, -x+1/2, z+1/2' 
 'y+1/2, -x+1/2, -z+1/2' 
 '-y+1/2, x+1/2, -z+1/2' 
 'x+1/2, z+1/2, y+1/2' 
 '-x+1/2, z+1/2, -y+1/2' 
 '-x+1/2, -z+1/2, y+1/2' 
 'x+1/2, -z+1/2, -y+1/2' 
 'z+1/2, y+1/2, x+1/2' 
 'z+1/2, -y+1/2, -x+1/2' 
 '-z+1/2, y+1/2, -x+1/2' 
 '-z+1/2, -y+1/2, x+1/2' 
  
_cell_length_a                    26.6871(4) 
_cell_length_b                    26.6871(4) 
_cell_length_c                    26.6871(4) 
_cell_angle_alpha                 90.00 
_cell_angle_beta                  90.00 
_cell_angle_gamma                 90.00 
_cell_volume                      19006.6(5) 
_cell_formula_units_Z             24 
_cell_measurement_temperature     100(2) 
_cell_measurement_reflns_used     9094 
_cell_measurement_theta_min       2.41 
_cell_measurement_theta_max       32.12 
  
_exptl_crystal_description        block 
_exptl_crystal_colour             colourless 
_exptl_crystal_size_max           0.18 
_exptl_crystal_size_mid           0.14 
_exptl_crystal_size_min           0.13 
_exptl_crystal_density_meas       ? 
_exptl_crystal_density_diffrn     1.653 
_exptl_crystal_density_method     'not measured' 
_exptl_crystal_F_000              9264 
_exptl_absorpt_coefficient_mu     3.950 
_exptl_absorpt_correction_type    multi-scan 
_exptl_absorpt_correction_T_min   0.5366 
_exptl_absorpt_correction_T_max   0.6277 
_exptl_absorpt_process_details    sadabs 
  
_exptl_special_details 
; 
 ? 
; 
  
_diffrn_ambient_temperature       100(2) 
_diffrn_radiation_wavelength      0.71073 
_diffrn_radiation_type            MoK\a 
_diffrn_radiation_source          'fine-focus sealed tube' 
_diffrn_radiation_monochromator   graphite 
_diffrn_measurement_device_type   'Bruker APEX-II CCD' 
_diffrn_measurement_method        '\f and \w scans' 
_diffrn_detector_area_resol_mean  ? 
_diffrn_reflns_number             9673 
_diffrn_reflns_av_R_equivalents   0.0000 
_diffrn_reflns_av_sigmaI/netI     0.0258 
_diffrn_reflns_limit_h_min        -22 
_diffrn_reflns_limit_h_max        22 
_diffrn_reflns_limit_k_min        0 
_diffrn_reflns_limit_k_max        26 
_diffrn_reflns_limit_l_min        2 
_diffrn_reflns_limit_l_max        38 
_diffrn_reflns_theta_min          1.71 
_diffrn_reflns_theta_max          30.50 
_reflns_number_total              9673 
_reflns_number_gt                 8829 
_reflns_threshold_expression      >2sigma(I) 
  
_computing_data_collection        'Bruker APEX2' 
_computing_cell_refinement        'Bruker SAINT' 
_computing_data_reduction         'Bruker SAINT' 
_computing_structure_solution     'SHELXS-97 (Sheldrick, 2008)' 
_computing_structure_refinement   'SHELXL-97 (Sheldrick, 2008)' 
_computing_molecular_graphics     'Bruker SHELXTL' 
_computing_publication_material   'Bruker SHELXTL' 
  
_refine_special_details 
; 
 Refinement of F^2^ against ALL reflections.  The weighted R-factor wR and 
 goodness of fit S are based on F^2^, conventional R-factors R are based 
 on F, with F set to zero for negative F^2^. The threshold expression of 
 F^2^ > 2sigma(F^2^) is used only for calculating R-factors(gt) etc. and is 
 not relevant to the choice of reflections for refinement.  R-factors based 
 on F^2^ are statistically about twice as large as those based on F, and R- 
 factors based on ALL data will be even larger. 
; 
  
_refine_ls_structure_factor_coef  Fsqd 
_refine_ls_matrix_type            full 
_refine_ls_weighting_scheme       calc 
_refine_ls_weighting_details 
 'calc w=1/[\s^2^(Fo^2^)+(0.0410P)^2^+15.5290P] where P=(Fo^2^+2Fc^2^)/3' 
_atom_sites_solution_primary      direct 
_atom_sites_solution_secondary    difmap 
_atom_sites_solution_hydrogens    geom 
_refine_ls_hydrogen_treatment     constr 
_refine_ls_extinction_method      none 
_refine_ls_extinction_coef        ? 
_refine_ls_abs_structure_details 
 'Flack H D (1983), Acta Cryst. A39, 876-881' 
_refine_ls_abs_structure_Flack    -0.016(6) 
_refine_ls_number_reflns          9673 
_refine_ls_number_parameters      418 
_refine_ls_number_restraints      155 
_refine_ls_R_factor_all           0.0341 
_refine_ls_R_factor_gt            0.0277 
_refine_ls_wR_factor_ref          0.0732 
_refine_ls_wR_factor_gt           0.0694 
_refine_ls_goodness_of_fit_ref    1.103 
_refine_ls_restrained_S_all       1.168 
_refine_ls_shift/su_max           0.006 
_refine_ls_shift/su_mean          0.000 
  
loop_ 
 _atom_site_label 
 _atom_site_type_symbol 
 _atom_site_fract_x 
 _atom_site_fract_y 
 _atom_site_fract_z 
 _atom_site_U_iso_or_equiv 
 _atom_site_adp_type 
 _atom_site_occupancy 
 _atom_site_symmetry_multiplicity 
 _atom_site_calc_flag 
 _atom_site_refinement_flags 
 _atom_site_disorder_assembly 
 _atom_site_disorder_group 
P1 P -0.19473(3) 0.30604(4) 1.48740(3) 0.01813(16) Uani 1 1 d . . . 
Re1 Re -0.277841(5) 0.327652(6) 1.524401(6) 0.02090(4) Uani 1 1 d . . . 
N1 N -0.24486(11) 0.20457(12) 1.48439(11) 0.0200(6) Uani 1 1 d . . . 
N2 N -0.24602(13) 0.14450(13) 1.41823(13) 0.0255(7) Uani 1 1 d . . . 
N3 N -0.31518(12) 0.15668(12) 1.46847(12) 0.0222(6) Uani 1 1 d . . . 
O1 O -0.27574(17) 0.42699(14) 1.46187(16) 0.0512(10) Uani 1 1 d . . . 
O2 O -0.23578(13) 0.39410(14) 1.61123(13) 0.0401(8) Uani 1 1 d . . . 
O3 O -0.38706(13) 0.34737(15) 1.56054(15) 0.0423(8) Uani 1 1 d . . . 
O4 O -0.26731(11) 0.23412(11) 1.59548(10) 0.0260(6) Uani 1 1 d . . . 
O5 O -0.33243(11) 0.26566(11) 1.44018(11) 0.0284(6) Uani 1 1 d . . . 
C1 C -0.27777(18) 0.39056(16) 1.48288(18) 0.0344(9) Uani 1 1 d . . . 
C2 C -0.24960(16) 0.36919(17) 1.57999(16) 0.0300(8) Uani 1 1 d . . . 
C3 C -0.34671(17) 0.34140(17) 1.54904(18) 0.0329(9) Uani 1 1 d . . . 
C4 C -0.27198(13) 0.26665(14) 1.56885(13) 0.0226(7) Uani 1 1 d . . . 
C5 C -0.31107(14) 0.28695(15) 1.46930(15) 0.0241(7) Uani 1 1 d . . . 
C11 C -0.14737(14) 0.35208(14) 1.50517(14) 0.0209(7) Uani 1 1 d . . . 
C12 C -0.12393(15) 0.38225(15) 1.47049(15) 0.0265(7) Uani 1 1 d . . . 
H12 H -0.1316 0.3785 1.4359 0.032 Uiso 1 1 calc R . . 
C13 C -0.08878(18) 0.41853(17) 1.48535(17) 0.0352(10) Uani 1 1 d . . . 
H13 H -0.0732 0.4393 1.4610 0.042 Uiso 1 1 calc R . . 
C14 C -0.07707(18) 0.42379(17) 1.53528(17) 0.0355(10) Uani 1 1 d . . . 
H14 H -0.0533 0.4483 1.5455 0.043 Uiso 1 1 calc R . . 
C15 C -0.10000(15) 0.39326(15) 1.57074(16) 0.0272(8) Uani 1 1 d . . . 
H15 H -0.0916 0.3969 1.6051 0.033 Uiso 1 1 calc R . . 
C16 C -0.13482(15) 0.35776(15) 1.55643(14) 0.0240(7) Uani 1 1 d . . . 
H16 H -0.1503 0.3372 1.5810 0.029 Uiso 1 1 calc R . . 
C21 C -0.19256(13) 0.30513(13) 1.41840(13) 0.0196(6) Uani 1 1 d . . . 
C22 C -0.15034(14) 0.28503(16) 1.39588(14) 0.0247(7) Uani 1 1 d . . . 
H22 H -0.1233 0.2736 1.4161 0.030 Uiso 1 1 calc R . . 
C23 C -0.14711(15) 0.28139(16) 1.34390(14) 0.0259(7) Uani 1 1 d . . . 
H23 H -0.1179 0.2679 1.3287 0.031 Uiso 1 1 calc R . . 
C24 C -0.18684(15) 0.29762(15) 1.31433(14) 0.0261(8) Uani 1 1 d . . . 
H24 H -0.1854 0.2940 1.2790 0.031 Uiso 1 1 calc R . . 
C25 C -0.22850(14) 0.31909(15) 1.33645(13) 0.0252(7) Uani 1 1 d . . . 
H25 H -0.2551 0.3310 1.3160 0.030 Uiso 1 1 calc R . . 
C26 C -0.23183(13) 0.32338(14) 1.38872(13) 0.0210(7) Uani 1 1 d . . . 
H26 H -0.2603 0.3385 1.4038 0.025 Uiso 1 1 calc R . . 
C31 C -0.16600(13) 0.24603(13) 1.50243(12) 0.0184(6) Uani 1 1 d . . . 
C32 C -0.11517(14) 0.24316(15) 1.51525(13) 0.0219(7) Uani 1 1 d . . . 
H32 H -0.0966 0.2732 1.5199 0.026 Uiso 1 1 calc R . . 
C33 C -0.09155(14) 0.19744(16) 1.52124(14) 0.0254(7) Uani 1 1 d . . . 
H33 H -0.0570 0.1960 1.5295 0.031 Uiso 1 1 calc R . . 
C34 C -0.11908(15) 0.15359(15) 1.51504(13) 0.0246(7) Uani 1 1 d . . . 
H34 H -0.1032 0.1221 1.5196 0.030 Uiso 1 1 calc R . . 
C35 C -0.16899(15) 0.15534(14) 1.50244(13) 0.0225(7) Uani 1 1 d . . . 
H35 H -0.1870 0.1249 1.4985 0.027 Uiso 1 1 calc R . . 
C36 C -0.19408(13) 0.20145(14) 1.49514(12) 0.0189(6) Uani 1 1 d . . . 
C37 C -0.26699(13) 0.16884(14) 1.45787(13) 0.0197(6) Uani 1 1 d . . . 
C38 C -0.25397(19) 0.09092(16) 1.41015(19) 0.0367(10) Uani 1 1 d . . . 
H38A H -0.2754 0.0776 1.4368 0.055 Uiso 1 1 calc R . . 
H38B H -0.2216 0.0735 1.4106 0.055 Uiso 1 1 calc R . . 
H38C H -0.2702 0.0857 1.3776 0.055 Uiso 1 1 calc R . . 
C39 C -0.20660(15) 0.16791(18) 1.38911(15) 0.0287(8) Uani 1 1 d . . . 
H39A H -0.2118 0.2043 1.3884 0.043 Uiso 1 1 calc R . . 
H39B H -0.2073 0.1548 1.3548 0.043 Uiso 1 1 calc R . . 
H39C H -0.1740 0.1605 1.4044 0.043 Uiso 1 1 calc R . . 
C40 C -0.33675(14) 0.16723(17) 1.51711(15) 0.0280(8) Uani 1 1 d . . . 
H40A H -0.3100 0.1691 1.5422 0.042 Uiso 1 1 calc R . . 
H40B H -0.3602 0.1405 1.5262 0.042 Uiso 1 1 calc R . . 
H40C H -0.3546 0.1993 1.5159 0.042 Uiso 1 1 calc R . . 
C41 C -0.35146(16) 0.14353(18) 1.42979(16) 0.0306(8) Uani 1 1 d . . . 
H41A H -0.3354 0.1453 1.3968 0.046 Uiso 1 1 calc R . . 
H41B H -0.3796 0.1671 1.4309 0.046 Uiso 1 1 calc R . . 
H41C H -0.3637 0.1094 1.4356 0.046 Uiso 1 1 calc R . . 
B1 B 0.0000 0.5000 1.3625(3) 0.0383(13) Uani 1 2 d SDU . . 
B2 B -0.1219(2) 0.1219(2) 0.8781(2) 0.0110(19) Uiso 0.50 3 d SPU . . 
B3 B -0.19619(18) 0.19619(18) 1.19619(18) 0.0280(12) Uani 1 3 d SU . . 
F1 F -0.0352(3) 0.5300(3) 1.3413(3) 0.120(3) Uani 0.815(9) 1 d PDU A 1 
F1A F 0.0043(10) 0.5381(5) 1.3292(7) 0.088(6) Uani 0.185(9) 1 d PDU A 2 
F2 F -0.0270(2) 0.4724(2) 1.3954(3) 0.106(2) Uani 0.815(9) 1 d PDU A 1 
F2A F -0.0440(5) 0.5024(12) 1.3847(9) 0.109(6) Uani 0.185(9) 1 d PDU A 2 
F3 F -0.1466(3) 0.1466(3) 0.8534(3) 0.048(2) Uani 0.50 3 d SPU . . 
F4 F -0.1273(2) 0.1291(2) 0.9311(2) 0.0392(12) Uani 0.50 1 d PU . . 
F5 F -0.16610(11) 0.16610(11) 1.16610(11) 0.0559(13) Uani 1 3 d SU . . 
F6 F -0.19364(11) 0.24526(10) 1.17912(12) 0.0425(7) Uani 1 1 d U . . 
  
loop_ 
 _atom_site_aniso_label 
 _atom_site_aniso_U_11 
 _atom_site_aniso_U_22 
 _atom_site_aniso_U_33 
 _atom_site_aniso_U_23 
 _atom_site_aniso_U_13 
 _atom_site_aniso_U_12 
P1 0.0181(4) 0.0213(4) 0.0151(4) -0.0002(3) 0.0002(3) -0.0024(3) 
Re1 0.02059(7) 0.02153(7) 0.02057(7) -0.00459(5) 0.00189(5) -0.00148(5) 
N1 0.0198(14) 0.0226(14) 0.0175(14) -0.0016(11) 0.0009(10) -0.0011(11) 
N2 0.0262(16) 0.0267(16) 0.0236(16) -0.0080(12) 0.0037(12) -0.0033(12) 
N3 0.0208(15) 0.0242(15) 0.0216(15) 0.0010(11) 0.0004(11) -0.0065(11) 
O1 0.068(3) 0.0304(18) 0.055(2) 0.0093(15) -0.0020(19) 0.0028(18) 
O2 0.0429(19) 0.0441(19) 0.0335(17) -0.0187(14) 0.0045(14) -0.0161(15) 
O3 0.0284(16) 0.050(2) 0.049(2) -0.0148(16) 0.0075(14) 0.0019(14) 
O4 0.0256(14) 0.0299(15) 0.0224(12) -0.0009(11) 0.0018(10) -0.0023(11) 
O5 0.0300(15) 0.0287(14) 0.0266(14) -0.0008(11) -0.0061(11) -0.0026(11) 
C1 0.036(2) 0.028(2) 0.039(2) -0.0048(17) -0.0023(19) 0.0021(17) 
C2 0.029(2) 0.032(2) 0.029(2) -0.0025(17) 0.0056(16) -0.0050(16) 
C3 0.030(2) 0.030(2) 0.038(2) -0.0137(17) 0.0040(17) -0.0062(16) 
C4 0.0162(15) 0.0293(19) 0.0222(16) -0.0081(13) 0.0009(12) -0.0069(13) 
C5 0.0192(16) 0.0267(18) 0.0264(19) 0.0020(14) 0.0025(13) 0.0036(13) 
C11 0.0228(17) 0.0202(16) 0.0198(16) 0.0004(13) -0.0029(13) -0.0022(13) 
C12 0.0305(19) 0.0240(18) 0.0249(18) 0.0060(15) -0.0044(15) -0.0064(14) 
C13 0.039(2) 0.031(2) 0.036(2) 0.0083(17) -0.0036(18) -0.0147(17) 
C14 0.038(2) 0.029(2) 0.040(2) -0.0034(17) -0.0110(18) -0.0106(17) 
C15 0.0273(19) 0.0279(19) 0.0266(19) -0.0037(15) -0.0097(15) -0.0022(15) 
C16 0.0259(18) 0.0261(18) 0.0199(16) 0.0000(13) -0.0026(14) -0.0042(14) 
C21 0.0210(16) 0.0200(16) 0.0177(15) 0.0000(12) -0.0020(12) -0.0068(12) 
C22 0.0217(17) 0.033(2) 0.0191(17) 0.0025(14) -0.0003(13) -0.0019(14) 
C23 0.0252(18) 0.034(2) 0.0190(16) 0.0007(14) 0.0030(13) -0.0003(15) 
C24 0.031(2) 0.0311(19) 0.0161(16) 0.0034(14) 0.0001(13) -0.0066(15) 
C25 0.0238(17) 0.0317(19) 0.0201(17) 0.0069(13) -0.0057(13) -0.0065(14) 
C26 0.0180(16) 0.0263(17) 0.0188(15) 0.0025(13) -0.0010(12) -0.0041(13) 
C31 0.0210(16) 0.0221(16) 0.0122(14) 0.0009(11) 0.0009(12) -0.0003(12) 
C32 0.0215(17) 0.0271(18) 0.0172(16) -0.0010(13) -0.0011(12) -0.0018(13) 
C33 0.0196(17) 0.037(2) 0.0200(17) -0.0007(15) -0.0018(13) 0.0033(14) 
C34 0.0303(19) 0.0274(18) 0.0161(17) 0.0014(13) -0.0004(13) 0.0080(14) 
C35 0.0248(17) 0.0267(17) 0.0159(15) 0.0005(12) 0.0021(13) -0.0007(14) 
C36 0.0217(16) 0.0233(16) 0.0117(14) -0.0007(12) 0.0019(12) -0.0020(13) 
C37 0.0198(16) 0.0197(16) 0.0196(15) 0.0004(12) 0.0014(12) -0.0011(12) 
C38 0.042(2) 0.026(2) 0.042(3) -0.0130(18) 0.003(2) -0.0029(18) 
C39 0.0256(18) 0.039(2) 0.0213(17) -0.0083(16) 0.0005(14) -0.0020(16) 
C40 0.0223(17) 0.037(2) 0.0248(18) 0.0005(16) 0.0054(14) -0.0026(15) 
C41 0.027(2) 0.039(2) 0.026(2) -0.0021(16) -0.0068(15) -0.0086(16) 
B1 0.046(4) 0.019(3) 0.050(4) 0.000 0.000 0.000(2) 
B3 0.0280(12) 0.0280(12) 0.0280(12) 0.0018(11) -0.0018(11) -0.0018(11) 
F1 0.119(6) 0.105(5) 0.135(6) 0.042(4) -0.048(5) 0.035(4) 
F1A 0.094(12) 0.042(8) 0.127(12) 0.045(7) 0.004(10) -0.010(9) 
F2 0.082(4) 0.057(3) 0.180(6) 0.055(3) 0.056(4) 0.008(3) 
F2A 0.064(8) 0.109(11) 0.152(11) 0.032(10) 0.042(8) 0.008(9) 
F3 0.048(2) 0.048(2) 0.048(2) -0.012(2) 0.012(2) -0.012(2) 
F4 0.028(2) 0.054(3) 0.035(2) -0.032(2) 0.013(2) -0.010(2) 
F5 0.0559(13) 0.0559(13) 0.0559(13) -0.0120(12) 0.0120(12) 0.0120(12) 
F6 0.0436(16) 0.0344(12) 0.0495(17) 0.0137(12) -0.0119(13) -0.0074(11) 
  
_geom_special_details 
; 
 All esds (except the esd in the dihedral angle between two l.s. planes) 
 are estimated using the full covariance matrix.  The cell esds are taken 
 into account individually in the estimation of esds in distances, angles 
 and torsion angles; correlations between esds in cell parameters are only 
 used when they are defined by crystal symmetry.  An approximate (isotropic) 
 treatment of cell esds is used for estimating esds involving l.s. planes. 
; 
  
loop_ 
 _geom_bond_atom_site_label_1 
 _geom_bond_atom_site_label_2 
 _geom_bond_distance 
 _geom_bond_site_symmetry_2 
 _geom_bond_publ_flag 
P1 C31 1.820(4) . ? 
P1 C11 1.825(4) . ? 
P1 C21 1.842(4) . ? 
P1 Re1 2.4956(9) . ? 
Re1 C3 1.986(4) . ? 
Re1 C2 1.999(4) . ? 
Re1 C1 2.011(5) . ? 
Re1 C4 2.020(4) . ? 
Re1 C5 2.032(4) . ? 
N1 C37 1.326(5) . ? 
N1 C36 1.388(5) . ? 
N2 C37 1.361(5) . ? 
N2 C39 1.450(5) . ? 
N2 C38 1.461(5) . ? 
N3 C37 1.356(5) . ? 
N3 C40 1.448(5) . ? 
N3 C41 1.458(5) . ? 
O1 C1 1.124(6) . ? 
O2 C2 1.128(5) . ? 
O3 C3 1.131(6) . ? 
O4 C4 1.129(5) . ? 
O5 C5 1.119(5) . ? 
C11 C12 1.377(5) . ? 
C11 C16 1.416(5) . ? 
C12 C13 1.405(6) . ? 
C13 C14 1.376(6) . ? 
C14 C15 1.391(6) . ? 
C15 C16 1.381(5) . ? 
C21 C22 1.385(5) . ? 
C21 C26 1.401(5) . ? 
C22 C23 1.393(5) . ? 
C23 C24 1.391(6) . ? 
C24 C25 1.383(6) . ? 
C25 C26 1.402(5) . ? 
C31 C32 1.401(5) . ? 
C31 C36 1.419(5) . ? 
C32 C33 1.382(5) . ? 
C33 C34 1.392(6) . ? 
C34 C35 1.374(6) . ? 
C35 C36 1.414(5) . ? 
B1 F2A 1.317(10) 2_565 ? 
B1 F2A 1.317(10) . ? 
B1 F1A 1.354(10) 2_565 ? 
B1 F1A 1.354(10) . ? 
B1 F2 1.355(6) 2_565 ? 
B1 F2 1.355(6) . ? 
B1 F1 1.358(5) . ? 
B1 F1 1.358(6) 2_565 ? 
B2 F3 1.138(16) . ? 
B2 F4 1.435(7) 12_566 ? 
B2 F4 1.435(7) 6_456 ? 
B2 F4 1.435(7) . ? 
B3 F6 1.388(4) 10_546 ? 
B3 F6 1.388(4) 7_656 ? 
B3 F6 1.388(4) . ? 
B3 F5 1.391(10) . ? 
  
loop_ 
 _geom_angle_atom_site_label_1 
 _geom_angle_atom_site_label_2 
 _geom_angle_atom_site_label_3 
 _geom_angle 
 _geom_angle_site_symmetry_1 
 _geom_angle_site_symmetry_3 
 _geom_angle_publ_flag 
C31 P1 C11 104.09(17) . . ? 
C31 P1 C21 101.27(16) . . ? 
C11 P1 C21 104.30(16) . . ? 
C31 P1 Re1 119.37(12) . . ? 
C11 P1 Re1 110.91(13) . . ? 
C21 P1 Re1 115.24(12) . . ? 
C3 Re1 C2 90.05(17) . . ? 
C3 Re1 C1 91.7(2) . . ? 
C2 Re1 C1 86.88(18) . . ? 
C3 Re1 C4 91.49(18) . . ? 
C2 Re1 C4 88.97(16) . . ? 
C1 Re1 C4 174.79(17) . . ? 
C3 Re1 C5 86.24(16) . . ? 
C2 Re1 C5 176.26(17) . . ? 
C1 Re1 C5 92.74(17) . . ? 
C4 Re1 C5 91.60(14) . . ? 
C3 Re1 P1 174.98(13) . . ? 
C2 Re1 P1 94.97(13) . . ? 
C1 Re1 P1 88.52(14) . . ? 
C4 Re1 P1 88.70(10) . . ? 
C5 Re1 P1 88.74(11) . . ? 
C37 N1 C36 120.1(3) . . ? 
C37 N2 C39 120.6(3) . . ? 
C37 N2 C38 121.4(4) . . ? 
C39 N2 C38 116.6(3) . . ? 
C37 N3 C40 121.2(3) . . ? 
C37 N3 C41 122.6(3) . . ? 
C40 N3 C41 114.7(3) . . ? 
O1 C1 Re1 175.6(4) . . ? 
O2 C2 Re1 176.5(4) . . ? 
O3 C3 Re1 175.5(4) . . ? 
O4 C4 Re1 176.3(3) . . ? 
O5 C5 Re1 175.2(3) . . ? 
C12 C11 C16 118.6(3) . . ? 
C12 C11 P1 122.2(3) . . ? 
C16 C11 P1 119.1(3) . . ? 
C11 C12 C13 121.1(4) . . ? 
C14 C13 C12 119.7(4) . . ? 
C13 C14 C15 119.9(4) . . ? 
C16 C15 C14 120.7(4) . . ? 
C15 C16 C11 120.0(4) . . ? 
C22 C21 C26 119.8(3) . . ? 
C22 C21 P1 117.7(3) . . ? 
C26 C21 P1 122.5(3) . . ? 
C21 C22 C23 120.6(4) . . ? 
C24 C23 C22 119.7(4) . . ? 
C25 C24 C23 120.0(3) . . ? 
C24 C25 C26 120.6(3) . . ? 
C21 C26 C25 119.1(3) . . ? 
C32 C31 C36 119.9(3) . . ? 
C32 C31 P1 120.6(3) . . ? 
C36 C31 P1 119.0(3) . . ? 
C33 C32 C31 121.2(4) . . ? 
C32 C33 C34 119.2(3) . . ? 
C35 C34 C33 120.8(4) . . ? 
C34 C35 C36 121.5(4) . . ? 
N1 C36 C35 122.9(3) . . ? 
N1 C36 C31 119.6(3) . . ? 
C35 C36 C31 117.4(3) . . ? 
N1 C37 N3 118.9(3) . . ? 
N1 C37 N2 125.1(3) . . ? 
N3 C37 N2 116.0(3) . . ? 
F2A B1 F2A 126(2) 2_565 . ? 
F2A B1 F1A 109.5(13) 2_565 2_565 ? 
F2A B1 F1A 104.8(12) . 2_565 ? 
F2A B1 F1A 104.8(12) 2_565 . ? 
F2A B1 F1A 109.5(13) . . ? 
F1A B1 F1A 98.1(17) 2_565 . ? 
F2A B1 F2 42.3(13) 2_565 2_565 ? 
F2A B1 F2 98.9(12) . 2_565 ? 
F1A B1 F2 151.5(12) 2_565 2_565 ? 
F1A B1 F2 88.4(10) . 2_565 ? 
F2A B1 F2 98.9(12) 2_565 . ? 
F2A B1 F2 42.3(13) . . ? 
F1A B1 F2 88.4(10) 2_565 . ? 
F1A B1 F2 151.5(11) . . ? 
F2 B1 F2 99.1(8) 2_565 . ? 
F2A B1 F1 146.4(13) 2_565 . ? 
F2A B1 F1 62.7(12) . . ? 
F1A B1 F1 96.4(11) 2_565 . ? 
F1A B1 F1 49.0(11) . . ? 
F2 B1 F1 108.5(4) 2_565 . ? 
F2 B1 F1 102.8(5) . . ? 
F2A B1 F1 62.7(12) 2_565 2_565 ? 
F2A B1 F1 146.4(13) . 2_565 ? 
F1A B1 F1 49.0(11) 2_565 2_565 ? 
F1A B1 F1 96.4(11) . 2_565 ? 
F2 B1 F1 102.8(5) 2_565 2_565 ? 
F2 B1 F1 108.5(4) . 2_565 ? 
F1 B1 F1 130.9(10) . 2_565 ? 
F3 B2 F4 115.8(5) . 12_566 ? 
F3 B2 F4 115.8(5) . 6_456 ? 
F4 B2 F4 102.5(6) 12_566 6_456 ? 
F3 B2 F4 115.8(5) . . ? 
F4 B2 F4 102.5(6) 12_566 . ? 
F4 B2 F4 102.5(6) 6_456 . ? 
F6 B3 F6 109.9(4) 10_546 7_656 ? 
F6 B3 F6 109.9(4) 10_546 . ? 
F6 B3 F6 109.9(4) 7_656 . ? 
F6 B3 F5 109.1(4) 10_546 . ? 
F6 B3 F5 109.1(4) 7_656 . ? 
F6 B3 F5 109.1(4) . . ? 
  
_diffrn_measured_fraction_theta_max    1.000 
_diffrn_reflns_theta_full              30.50 
_diffrn_measured_fraction_theta_full   1.000 
_refine_diff_density_max    1.883 
_refine_diff_density_min   -0.570 
_refine_diff_density_rms    0.117 

# SQUEEZE RESULTS (APPEND TO CIF)
# Note: Data are Listed for all Voids in the P1 Unit Cell
# i.e. Centre of Gravity, Solvent Accessible Volume,
# Recovered number of Electrons in the Void and
# Details about the Squeezed Material
loop_
  _platon_squeeze_void_nr
  _platon_squeeze_void_average_x
  _platon_squeeze_void_average_y
  _platon_squeeze_void_average_z
  _platon_squeeze_void_volume
  _platon_squeeze_void_count_electrons
  _platon_squeeze_void_content
   1  0.000  0.000  0.000       393        77 ' '
   2  0.308  0.000  0.000        59         4 ' '
   3  0.692  0.000  0.000        59         4 ' '
   4  0.000  0.000  0.308        59         4 ' '
   5  0.000  0.000  0.692        59         4 ' '
   6  0.500  0.192  0.500        59         4 ' '
   7  1.000  0.308  0.000        59         4 ' '
   8  0.500  0.500  0.500       393        77 ' '
   9  0.500  0.500  0.192        59         4 ' '
  10  0.500  0.500  0.808        59         4 ' '
  11  0.192  0.500  0.500        59         4 ' '
  12  0.808  0.500  0.500        59         4 ' '
  13  0.000  0.692  0.000        59         4 ' '
  14  0.500  0.808  0.500        59         4 ' '

#===END
 
data_6 
  
_audit_creation_method            SHELXL-97 
_chemical_name_systematic 
; 
 ? 
; 
_chemical_name_common             ? 
_chemical_melting_point           ? 
_chemical_formula_moiety          ? 
_chemical_formula_sum 
 'C30 H28 B F4 N O6 P Re' 
_chemical_formula_weight          802.51 
  
loop_ 
 _atom_type_symbol 
 _atom_type_description 
 _atom_type_scat_dispersion_real 
 _atom_type_scat_dispersion_imag 
 _atom_type_scat_source 
 'C'  'C'   0.0033   0.0016 
 'International Tables Vol C Tables 4.2.6.8 and 6.1.1.4' 
 'H'  'H'   0.0000   0.0000 
 'International Tables Vol C Tables 4.2.6.8 and 6.1.1.4' 
 'B'  'B'   0.0013   0.0007 
 'International Tables Vol C Tables 4.2.6.8 and 6.1.1.4' 
 'O'  'O'   0.0106   0.0060 
 'International Tables Vol C Tables 4.2.6.8 and 6.1.1.4' 
 'F'  'F'   0.0171   0.0103 
 'International Tables Vol C Tables 4.2.6.8 and 6.1.1.4' 
 'P'  'P'   0.1023   0.0942 
 'International Tables Vol C Tables 4.2.6.8 and 6.1.1.4' 
 'Re'  'Re'  -1.0185   7.2310 
 'International Tables Vol C Tables 4.2.6.8 and 6.1.1.4' 
 'N'  'N'   0.0061   0.0033 
 'International Tables Vol C Tables 4.2.6.8 and 6.1.1.4' 
  
_symmetry_cell_setting            Monoclinic 
_symmetry_space_group_name_H-M    P2(1)/c 
  
loop_ 
 _symmetry_equiv_pos_as_xyz 
 'x, y, z' 
 '-x, y+1/2, -z+1/2' 
 '-x, -y, -z' 
 'x, -y-1/2, z-1/2' 
  
_cell_length_a                    10.9084(6) 
_cell_length_b                    25.6184(13) 
_cell_length_c                    12.0556(7) 
_cell_angle_alpha                 90.00 
_cell_angle_beta                  112.735(2) 
_cell_angle_gamma                 90.00 
_cell_volume                      3107.2(3) 
_cell_formula_units_Z             4 
_cell_measurement_temperature     100(2) 
_cell_measurement_reflns_used     9978 
_cell_measurement_theta_min       2.42 
_cell_measurement_theta_max       46.25 
  
_exptl_crystal_description        square 
_exptl_crystal_colour             colourless 
_exptl_crystal_size_max           0.45 
_exptl_crystal_size_mid           0.40 
_exptl_crystal_size_min           0.29 
_exptl_crystal_density_meas       ? 
_exptl_crystal_density_diffrn     1.715 
_exptl_crystal_density_method     'not measured' 
_exptl_crystal_F_000              1576 
_exptl_absorpt_coefficient_mu     4.029 
_exptl_absorpt_correction_type    multi-scan 
_exptl_absorpt_correction_T_min   0.2643 
_exptl_absorpt_correction_T_max   0.3878 
_exptl_absorpt_process_details    sadabs 
  
_exptl_special_details 
; 
 ? 
; 
  
_diffrn_ambient_temperature       100(2) 
_diffrn_radiation_wavelength      0.71073 
_diffrn_radiation_type            MoK\a 
_diffrn_radiation_source          'fine-focus sealed tube' 
_diffrn_radiation_monochromator   graphite 
_diffrn_measurement_device_type   'Bruker APEX-II CCD' 
_diffrn_measurement_method        '\f and \w scans' 
_diffrn_detector_area_resol_mean  ? 
_diffrn_reflns_number             273842 
_diffrn_reflns_av_R_equivalents   0.0345 
_diffrn_reflns_av_sigmaI/netI     0.0169 
_diffrn_reflns_limit_h_min        -22 
_diffrn_reflns_limit_h_max        22 
_diffrn_reflns_limit_k_min        -52 
_diffrn_reflns_limit_k_max        52 
_diffrn_reflns_limit_l_min        -24 
_diffrn_reflns_limit_l_max        24 
_diffrn_reflns_theta_min          2.00 
_diffrn_reflns_theta_max          46.34 
_reflns_number_total              27379 
_reflns_number_gt                 25151 
_reflns_threshold_expression      >2sigma(I) 
  
_computing_data_collection        'Bruker APEX2' 
_computing_cell_refinement        'Bruker SAINT' 
_computing_data_reduction         'Bruker SAINT' 
_computing_structure_solution     'SHELXS-97 (Sheldrick, 2008)' 
_computing_structure_refinement   'SHELXL-97 (Sheldrick, 2008)' 
_computing_molecular_graphics     'Bruker SHELXTL' 
_computing_publication_material   'Bruker SHELXTL' 
  
_refine_special_details 
; 
 Refinement of F^2^ against ALL reflections.  The weighted R-factor wR and 
 goodness of fit S are based on F^2^, conventional R-factors R are based 
 on F, with F set to zero for negative F^2^. The threshold expression of 
 F^2^ > 2sigma(F^2^) is used only for calculating R-factors(gt) etc. and is 
 not relevant to the choice of reflections for refinement.  R-factors based 
 on F^2^ are statistically about twice as large as those based on F, and R- 
 factors based on ALL data will be even larger. 
; 
  
_refine_ls_structure_factor_coef  Fsqd 
_refine_ls_matrix_type            full 
_refine_ls_weighting_scheme       calc 
_refine_ls_weighting_details 
 'calc w=1/[\s^2^(Fo^2^)+(0.0122P)^2^+2.1642P] where P=(Fo^2^+2Fc^2^)/3' 
_atom_sites_solution_primary      direct 
_atom_sites_solution_secondary    difmap 
_atom_sites_solution_hydrogens    geom 
_refine_ls_hydrogen_treatment     mixed 
_refine_ls_extinction_method      none 
_refine_ls_extinction_coef        ? 
_refine_ls_number_reflns          27379 
_refine_ls_number_parameters      405 
_refine_ls_number_restraints      1 
_refine_ls_R_factor_all           0.0273 
_refine_ls_R_factor_gt            0.0232 
_refine_ls_wR_factor_ref          0.0475 
_refine_ls_wR_factor_gt           0.0466 
_refine_ls_goodness_of_fit_ref    1.189 
_refine_ls_restrained_S_all       1.189 
_refine_ls_shift/su_max           0.040 
_refine_ls_shift/su_mean          0.000 
  
loop_ 
 _atom_site_label 
 _atom_site_type_symbol 
 _atom_site_fract_x 
 _atom_site_fract_y 
 _atom_site_fract_z 
 _atom_site_U_iso_or_equiv 
 _atom_site_adp_type 
 _atom_site_occupancy 
 _atom_site_symmetry_multiplicity 
 _atom_site_calc_flag 
 _atom_site_refinement_flags 
 _atom_site_disorder_assembly 
 _atom_site_disorder_group 
N1S N 0.7121(2) 1.04376(7) 0.07497(18) 0.0474(4) Uani 1 1 d . . . 
B1 B 0.77243(12) 1.06091(5) 0.55797(11) 0.01537(17) Uani 1 1 d . . . 
P1 P 1.26385(2) 1.147252(9) 0.20109(2) 0.00776(3) Uani 1 1 d . . . 
Re1 Re 1.395005(3) 1.066808(1) 0.211961(3) 0.00836(1) Uani 1 1 d . . . 
F1 F 0.70584(9) 1.10772(3) 0.55892(9) 0.02755(17) Uani 1 1 d . . . 
F2 F 0.70586(9) 1.03496(3) 0.44993(7) 0.02678(16) Uani 1 1 d . . . 
F3 F 0.90070(9) 1.07272(4) 0.56978(9) 0.02879(18) Uani 1 1 d . . . 
F4 F 0.77588(10) 1.02970(3) 0.65320(8) 0.02637(16) Uani 1 1 d . . . 
O1 O 1.54490(12) 0.96135(4) 0.23504(9) 0.0267(2) Uani 1 1 d . . . 
O2 O 1.12508(10) 1.00571(4) 0.10234(9) 0.02363(17) Uani 1 1 d . . . 
O3 O 1.38752(10) 1.08249(4) -0.04775(7) 0.02033(15) Uani 1 1 d . . . 
O4 O 1.66087(8) 1.13064(4) 0.29009(8) 0.01798(13) Uani 1 1 d . . . 
O5 O 1.43483(9) 1.05402(3) 0.48481(7) 0.01571(12) Uani 1 1 d . . . 
O6 O 1.48428(7) 1.16748(3) 0.42263(6) 0.01192(10) Uani 1 1 d D . . 
H1 H 1.5622(14) 1.1659(7) 0.4714(15) 0.014 Uiso 1 1 d D . . 
C1 C 1.49164(12) 1.00015(4) 0.22568(9) 0.01617(15) Uani 1 1 d . . . 
C1S C 0.86179(19) 0.98686(7) 0.25408(19) 0.0410(4) Uani 1 1 d . . . 
H1S1 H 0.8465 0.9964 0.3264 0.062 Uiso 1 1 calc R . . 
H1S2 H 0.9556 0.9924 0.2684 0.062 Uiso 1 1 calc R . . 
H1S3 H 0.8389 0.9500 0.2350 0.062 Uiso 1 1 calc R . . 
C2 C 1.22215(10) 1.02737(4) 0.14558(9) 0.01415(14) Uani 1 1 d . . . 
C2S C 0.77911(17) 1.01925(6) 0.15367(16) 0.0307(3) Uani 1 1 d . . . 
C3 C 1.38697(10) 1.07660(4) 0.04531(8) 0.01297(13) Uani 1 1 d . . . 
C4 C 1.56634(9) 1.10734(4) 0.26672(8) 0.01204(12) Uani 1 1 d . . . 
C5 C 1.41752(9) 1.05821(3) 0.38689(8) 0.01095(12) Uani 1 1 d . . . 
C10 C 1.32973(12) 1.34931(4) 0.13423(10) 0.01780(17) Uani 1 1 d . . . 
H10A H 1.2825 1.3390 0.0501 0.027 Uiso 1 1 calc R . . 
H10B H 1.4081 1.3700 0.1418 0.027 Uiso 1 1 calc R . . 
H10C H 1.2706 1.3702 0.1605 0.027 Uiso 1 1 calc R . . 
C11 C 1.35073(8) 1.20928(3) 0.24542(7) 0.00898(11) Uani 1 1 d . . . 
C12 C 1.45815(8) 1.21263(3) 0.35742(7) 0.00901(10) Uani 1 1 d . . . 
C13 C 1.52714(8) 1.25999(3) 0.39761(7) 0.00943(11) Uani 1 1 d . . . 
C14 C 1.48045(9) 1.30309(3) 0.32185(8) 0.01133(12) Uani 1 1 d . . . 
H14 H 1.5247 1.3355 0.3470 0.014 Uiso 1 1 calc R . . 
C15 C 1.37269(9) 1.30131(3) 0.21146(8) 0.01135(12) Uani 1 1 d . . . 
C16 C 1.30798(9) 1.25394(3) 0.17410(8) 0.01055(11) Uani 1 1 d . . . 
H16 H 1.2340 1.2518 0.0994 0.013 Uiso 1 1 calc R . . 
C21 C 1.14889(9) 1.15513(3) 0.04500(8) 0.01036(11) Uani 1 1 d . . . 
C22 C 1.01761(10) 1.13789(4) 0.00879(9) 0.01536(14) Uani 1 1 d . . . 
H22 H 0.9839 1.1276 0.0673 0.018 Uiso 1 1 calc R . . 
C23 C 0.93612(11) 1.13575(5) -0.11324(10) 0.02082(19) Uani 1 1 d . . . 
H23 H 0.8471 1.1238 -0.1374 0.025 Uiso 1 1 calc R . . 
C24 C 0.98369(13) 1.15087(5) -0.19955(10) 0.02039(19) Uani 1 1 d . . . 
H24 H 0.9276 1.1493 -0.2825 0.024 Uiso 1 1 calc R . . 
C25 C 1.11401(12) 1.16838(4) -0.16407(9) 0.01721(16) Uani 1 1 d . . . 
H25 H 1.1469 1.1789 -0.2230 0.021 Uiso 1 1 calc R . . 
C26 C 1.19637(10) 1.17053(4) -0.04264(8) 0.01329(13) Uani 1 1 d . . . 
H26 H 1.2853 1.1825 -0.0190 0.016 Uiso 1 1 calc R . . 
C31 C 1.15614(9) 1.14672(3) 0.28498(8) 0.01020(11) Uani 1 1 d . . . 
C32 C 1.12338(10) 1.10102(4) 0.33039(9) 0.01296(13) Uani 1 1 d . . . 
H32 H 1.1586 1.0685 0.3188 0.016 Uiso 1 1 calc R . . 
C33 C 1.03923(11) 1.10304(4) 0.39260(10) 0.01618(15) Uani 1 1 d . . . 
H33 H 1.0180 1.0719 0.4241 0.019 Uiso 1 1 calc R . . 
C34 C 0.98616(10) 1.15047(5) 0.40887(10) 0.01719(16) Uani 1 1 d . . . 
H34 H 0.9286 1.1517 0.4512 0.021 Uiso 1 1 calc R . . 
C35 C 1.01749(11) 1.19599(4) 0.36314(11) 0.01728(16) Uani 1 1 d . . . 
H35 H 0.9809 1.2284 0.3737 0.021 Uiso 1 1 calc R . . 
C36 C 1.10234(10) 1.19423(4) 0.30192(9) 0.01384(14) Uani 1 1 d . . . 
H36 H 1.1240 1.2255 0.2713 0.017 Uiso 1 1 calc R . . 
C101 C 1.65077(9) 1.26487(4) 0.51567(8) 0.01107(12) Uani 1 1 d . . . 
C102 C 1.76598(10) 1.23378(4) 0.50393(10) 0.01643(15) Uani 1 1 d . . . 
H10D H 1.7832 1.2468 0.4348 0.025 Uiso 1 1 calc R . . 
H10E H 1.7421 1.1967 0.4921 0.025 Uiso 1 1 calc R . . 
H10F H 1.8460 1.2380 0.5773 0.025 Uiso 1 1 calc R . . 
C103 C 1.69649(11) 1.32181(4) 0.54137(10) 0.01702(16) Uani 1 1 d . . . 
H10G H 1.6238 1.3431 0.5456 0.026 Uiso 1 1 calc R . . 
H10H H 1.7218 1.3349 0.4768 0.026 Uiso 1 1 calc R . . 
H10I H 1.7731 1.3238 0.6182 0.026 Uiso 1 1 calc R . . 
C104 C 1.62401(11) 1.24571(5) 0.62524(9) 0.01720(16) Uani 1 1 d . . . 
H10J H 1.7027 1.2520 0.6988 0.026 Uiso 1 1 calc R . . 
H10K H 1.6044 1.2082 0.6171 0.026 Uiso 1 1 calc R . . 
H10L H 1.5479 1.2647 0.6296 0.026 Uiso 1 1 calc R . . 
  
loop_ 
 _atom_site_aniso_label 
 _atom_site_aniso_U_11 
 _atom_site_aniso_U_22 
 _atom_site_aniso_U_33 
 _atom_site_aniso_U_23 
 _atom_site_aniso_U_13 
 _atom_site_aniso_U_12 
N1S 0.0570(11) 0.0263(6) 0.0448(9) 0.0004(6) 0.0039(8) 0.0065(7) 
B1 0.0144(4) 0.0146(4) 0.0140(4) 0.0039(3) 0.0021(3) -0.0016(3) 
P1 0.00755(7) 0.00707(7) 0.00819(7) -0.00043(6) 0.00252(6) -0.00026(6) 
Re1 0.00998(1) 0.00697(1) 0.00783(1) -0.00055(1) 0.00310(1) 0.00089(1) 
F1 0.0244(4) 0.0193(3) 0.0306(4) 0.0018(3) 0.0015(3) 0.0060(3) 
F2 0.0302(4) 0.0239(4) 0.0165(3) -0.0012(3) -0.0017(3) -0.0029(3) 
F3 0.0186(3) 0.0404(5) 0.0295(4) -0.0017(4) 0.0117(3) -0.0074(3) 
F4 0.0367(4) 0.0221(3) 0.0197(3) 0.0078(3) 0.0102(3) -0.0056(3) 
O1 0.0421(6) 0.0170(3) 0.0230(4) 0.0032(3) 0.0147(4) 0.0165(4) 
O2 0.0210(4) 0.0234(4) 0.0197(3) -0.0015(3) 0.0004(3) -0.0099(3) 
O3 0.0291(4) 0.0223(4) 0.0121(3) -0.0003(3) 0.0107(3) 0.0030(3) 
O4 0.0134(3) 0.0227(3) 0.0181(3) -0.0007(3) 0.0064(2) -0.0041(3) 
O5 0.0216(3) 0.0149(3) 0.0110(2) 0.0006(2) 0.0067(2) -0.0005(2) 
O6 0.0126(2) 0.0094(2) 0.0110(2) 0.00165(18) 0.00154(19) -0.00048(19) 
C1 0.0228(4) 0.0130(3) 0.0132(3) 0.0004(3) 0.0073(3) 0.0056(3) 
C1S 0.0326(8) 0.0290(7) 0.0426(9) 0.0017(6) -0.0063(7) -0.0042(6) 
C2 0.0161(4) 0.0119(3) 0.0121(3) -0.0008(2) 0.0028(3) -0.0021(3) 
C2S 0.0310(7) 0.0201(5) 0.0354(7) -0.0056(5) 0.0066(6) 0.0009(5) 
C3 0.0158(3) 0.0122(3) 0.0111(3) -0.0013(2) 0.0053(3) 0.0017(3) 
C4 0.0117(3) 0.0137(3) 0.0112(3) 0.0003(2) 0.0050(2) 0.0009(2) 
C5 0.0131(3) 0.0086(3) 0.0111(3) -0.0001(2) 0.0047(2) 0.0003(2) 
C10 0.0229(4) 0.0092(3) 0.0174(4) 0.0026(3) 0.0035(3) -0.0004(3) 
C11 0.0090(3) 0.0073(2) 0.0099(3) -0.0006(2) 0.0027(2) -0.0004(2) 
C12 0.0091(3) 0.0085(2) 0.0092(2) -0.0004(2) 0.0033(2) -0.0002(2) 
C13 0.0094(3) 0.0093(3) 0.0098(3) -0.0016(2) 0.0040(2) -0.0011(2) 
C14 0.0122(3) 0.0090(3) 0.0124(3) -0.0016(2) 0.0044(2) -0.0019(2) 
C15 0.0131(3) 0.0081(3) 0.0121(3) -0.0001(2) 0.0040(2) -0.0004(2) 
C16 0.0109(3) 0.0084(3) 0.0110(3) -0.0001(2) 0.0028(2) 0.0001(2) 
C21 0.0101(3) 0.0099(3) 0.0094(3) -0.0004(2) 0.0020(2) 0.0002(2) 
C22 0.0104(3) 0.0198(4) 0.0131(3) -0.0014(3) 0.0016(3) -0.0018(3) 
C23 0.0137(4) 0.0270(5) 0.0153(4) -0.0033(3) -0.0015(3) -0.0014(3) 
C24 0.0233(5) 0.0193(4) 0.0115(3) -0.0017(3) -0.0011(3) 0.0017(4) 
C25 0.0254(5) 0.0141(3) 0.0106(3) 0.0008(3) 0.0053(3) 0.0015(3) 
C26 0.0162(4) 0.0120(3) 0.0112(3) 0.0004(2) 0.0048(3) -0.0005(3) 
C31 0.0093(3) 0.0106(3) 0.0112(3) -0.0011(2) 0.0047(2) -0.0006(2) 
C32 0.0133(3) 0.0115(3) 0.0158(3) -0.0018(3) 0.0076(3) -0.0024(2) 
C33 0.0157(4) 0.0172(4) 0.0195(4) -0.0017(3) 0.0111(3) -0.0040(3) 
C34 0.0127(3) 0.0222(4) 0.0194(4) -0.0022(3) 0.0091(3) -0.0007(3) 
C35 0.0155(4) 0.0176(4) 0.0221(4) -0.0009(3) 0.0109(3) 0.0037(3) 
C36 0.0142(3) 0.0123(3) 0.0174(4) 0.0002(3) 0.0087(3) 0.0022(3) 
C101 0.0101(3) 0.0129(3) 0.0100(3) -0.0024(2) 0.0035(2) -0.0022(2) 
C102 0.0106(3) 0.0201(4) 0.0175(4) -0.0024(3) 0.0042(3) 0.0014(3) 
C103 0.0162(4) 0.0150(4) 0.0163(4) -0.0044(3) 0.0025(3) -0.0049(3) 
C104 0.0187(4) 0.0228(4) 0.0108(3) -0.0026(3) 0.0064(3) -0.0058(3) 
  
_geom_special_details 
; 
 All esds (except the esd in the dihedral angle between two l.s. planes) 
 are estimated using the full covariance matrix.  The cell esds are taken 
 into account individually in the estimation of esds in distances, angles 
 and torsion angles; correlations between esds in cell parameters are only 
 used when they are defined by crystal symmetry.  An approximate (isotropic) 
 treatment of cell esds is used for estimating esds involving l.s. planes. 
; 
  
loop_ 
 _geom_bond_atom_site_label_1 
 _geom_bond_atom_site_label_2 
 _geom_bond_distance 
 _geom_bond_site_symmetry_2 
 _geom_bond_publ_flag 
N1S C2S 1.137(2) . ? 
B1 F3 1.3842(15) . ? 
B1 F4 1.3875(13) . ? 
B1 F2 1.3909(14) . ? 
B1 F1 1.4044(15) . ? 
P1 C11 1.8215(8) . ? 
P1 C31 1.8227(9) . ? 
P1 C21 1.8249(9) . ? 
P1 Re1 2.4832(2) . ? 
Re1 C1 1.9799(10) . ? 
Re1 C3 1.9927(9) . ? 
Re1 C2 2.0125(10) . ? 
Re1 C4 2.0134(10) . ? 
Re1 C5 2.0386(9) . ? 
O1 C1 1.1347(13) . ? 
O2 C2 1.1288(13) . ? 
O3 C3 1.1344(12) . ? 
O4 C4 1.1288(13) . ? 
O5 C5 1.1262(12) . ? 
O6 C12 1.3654(11) . ? 
C1S C2S 1.457(2) . ? 
C10 C15 1.5037(13) . ? 
C11 C16 1.3984(12) . ? 
C11 C12 1.4073(12) . ? 
C12 C13 1.4111(12) . ? 
C13 C14 1.3976(12) . ? 
C13 C101 1.5416(12) . ? 
C14 C15 1.3949(13) . ? 
C15 C16 1.3885(12) . ? 
C21 C22 1.3976(13) . ? 
C21 C26 1.4012(13) . ? 
C22 C23 1.3952(15) . ? 
C23 C24 1.3854(19) . ? 
C24 C25 1.3911(18) . ? 
C25 C26 1.3917(14) . ? 
C31 C32 1.3960(13) . ? 
C31 C36 1.4002(13) . ? 
C32 C33 1.3929(14) . ? 
C33 C34 1.3920(16) . ? 
C34 C35 1.3880(16) . ? 
C35 C36 1.3898(14) . ? 
C101 C103 1.5341(14) . ? 
C101 C104 1.5392(13) . ? 
C101 C102 1.5399(14) . ? 
  
loop_ 
 _geom_angle_atom_site_label_1 
 _geom_angle_atom_site_label_2 
 _geom_angle_atom_site_label_3 
 _geom_angle 
 _geom_angle_site_symmetry_1 
 _geom_angle_site_symmetry_3 
 _geom_angle_publ_flag 
F3 B1 F4 109.74(10) . . ? 
F3 B1 F2 109.99(11) . . ? 
F4 B1 F2 109.68(9) . . ? 
F3 B1 F1 108.54(10) . . ? 
F4 B1 F1 109.51(11) . . ? 
F2 B1 F1 109.35(9) . . ? 
C11 P1 C31 102.57(4) . . ? 
C11 P1 C21 106.16(4) . . ? 
C31 P1 C21 103.86(4) . . ? 
C11 P1 Re1 119.00(3) . . ? 
C31 P1 Re1 116.51(3) . . ? 
C21 P1 Re1 107.37(3) . . ? 
C1 Re1 C3 90.42(4) . . ? 
C1 Re1 C2 89.26(5) . . ? 
C3 Re1 C2 89.59(4) . . ? 
C1 Re1 C4 91.18(4) . . ? 
C3 Re1 C4 86.52(4) . . ? 
C2 Re1 C4 176.09(4) . . ? 
C1 Re1 C5 88.45(4) . . ? 
C3 Re1 C5 175.83(4) . . ? 
C2 Re1 C5 94.41(4) . . ? 
C4 Re1 C5 89.49(4) . . ? 
C1 Re1 P1 175.96(3) . . ? 
C3 Re1 P1 92.43(3) . . ? 
C2 Re1 P1 87.91(3) . . ? 
C4 Re1 P1 91.84(3) . . ? 
C5 Re1 P1 88.90(3) . . ? 
O1 C1 Re1 178.10(11) . . ? 
O2 C2 Re1 176.30(10) . . ? 
N1S C2S C1S 178.4(2) . . ? 
O3 C3 Re1 177.36(10) . . ? 
O4 C4 Re1 175.70(9) . . ? 
O5 C5 Re1 177.39(9) . . ? 
C16 C11 C12 119.75(7) . . ? 
C16 C11 P1 121.42(6) . . ? 
C12 C11 P1 118.72(6) . . ? 
O6 C12 C11 114.32(7) . . ? 
O6 C12 C13 124.45(8) . . ? 
C11 C12 C13 121.18(8) . . ? 
C14 C13 C12 116.33(8) . . ? 
C14 C13 C101 120.47(8) . . ? 
C12 C13 C101 123.16(8) . . ? 
C15 C14 C13 123.88(8) . . ? 
C16 C15 C14 118.26(8) . . ? 
C16 C15 C10 121.07(8) . . ? 
C14 C15 C10 120.66(8) . . ? 
C15 C16 C11 120.57(8) . . ? 
C22 C21 C26 119.09(8) . . ? 
C22 C21 P1 120.00(7) . . ? 
C26 C21 P1 120.11(7) . . ? 
C23 C22 C21 120.02(10) . . ? 
C24 C23 C22 120.66(11) . . ? 
C23 C24 C25 119.62(10) . . ? 
C24 C25 C26 120.25(10) . . ? 
C25 C26 C21 120.37(10) . . ? 
C32 C31 C36 119.12(8) . . ? 
C32 C31 P1 122.78(7) . . ? 
C36 C31 P1 118.09(7) . . ? 
C33 C32 C31 120.12(9) . . ? 
C34 C33 C32 120.32(10) . . ? 
C35 C34 C33 119.86(9) . . ? 
C34 C35 C36 120.02(10) . . ? 
C35 C36 C31 120.56(9) . . ? 
C103 C101 C104 106.54(8) . . ? 
C103 C101 C102 107.30(8) . . ? 
C104 C101 C102 110.25(9) . . ? 
C103 C101 C13 111.32(8) . . ? 
C104 C101 C13 112.21(8) . . ? 
C102 C101 C13 109.09(7) . . ? 
  
loop_ 
 _geom_hbond_atom_site_label_D 
 _geom_hbond_atom_site_label_H 
 _geom_hbond_atom_site_label_A 
 _geom_hbond_distance_DH 
 _geom_hbond_distance_HA 
 _geom_hbond_distance_DA 
 _geom_hbond_angle_DHA 
 _geom_hbond_site_symmetry_A 
O6 H1 F1  0.827(14) 2.124(16) 2.7956(11) 138.3(17) 1_655 
  
_diffrn_measured_fraction_theta_max    0.997 
_diffrn_reflns_theta_full              46.34 
_diffrn_measured_fraction_theta_full   0.997 
_refine_diff_density_max    1.930 
_refine_diff_density_min   -2.531 
_refine_diff_density_rms    0.111 

#===END
 
data_7
  
_audit_creation_method            SHELXL-97 
_chemical_name_systematic 
; 
 ? 
; 
_chemical_name_common             ? 
_chemical_melting_point           ? 
_chemical_formula_moiety          ? 
_chemical_formula_sum 
 'C25 H25 B F4 N2 O4 P Re' 
_chemical_formula_weight          721.45 
  
loop_ 
 _atom_type_symbol 
 _atom_type_description 
 _atom_type_scat_dispersion_real 
 _atom_type_scat_dispersion_imag 
 _atom_type_scat_source 
 'C'  'C'   0.0033   0.0016 
 'International Tables Vol C Tables 4.2.6.8 and 6.1.1.4' 
 'H'  'H'   0.0000   0.0000 
 'International Tables Vol C Tables 4.2.6.8 and 6.1.1.4' 
 'B'  'B'   0.0013   0.0007 
 'International Tables Vol C Tables 4.2.6.8 and 6.1.1.4' 
 'N'  'N'   0.0061   0.0033 
 'International Tables Vol C Tables 4.2.6.8 and 6.1.1.4' 
 'O'  'O'   0.0106   0.0060 
 'International Tables Vol C Tables 4.2.6.8 and 6.1.1.4' 
 'F'  'F'   0.0171   0.0103 
 'International Tables Vol C Tables 4.2.6.8 and 6.1.1.4' 
 'P'  'P'   0.1023   0.0942 
 'International Tables Vol C Tables 4.2.6.8 and 6.1.1.4' 
 'Re'  'Re'  -1.0185   7.2310 
 'International Tables Vol C Tables 4.2.6.8 and 6.1.1.4' 
  
_symmetry_cell_setting            Triclinic 
_symmetry_space_group_name_H-M    P-1 
  
loop_ 
 _symmetry_equiv_pos_as_xyz 
 'x, y, z' 
 '-x, -y, -z' 
  
_cell_length_a                    9.8649(6) 
_cell_length_b                    11.6543(7) 
_cell_length_c                    13.1320(8) 
_cell_angle_alpha                 74.641(3) 
_cell_angle_beta                  72.146(3) 
_cell_angle_gamma                 66.792(2) 
_cell_volume                      1302.74(14) 
_cell_formula_units_Z             2 
_cell_measurement_temperature     296(2) 
_cell_measurement_reflns_used     9734 
_cell_measurement_theta_min       2.31 
_cell_measurement_theta_max       40.57 
  
_exptl_crystal_description        plate 
_exptl_crystal_colour             colourless 
_exptl_crystal_size_max           0.46 
_exptl_crystal_size_mid           0.27 
_exptl_crystal_size_min           0.08 
_exptl_crystal_density_meas       ? 
_exptl_crystal_density_diffrn     1.839 
_exptl_crystal_density_method     'not measured' 
_exptl_crystal_F_000              704 
_exptl_absorpt_coefficient_mu     4.789 
_exptl_absorpt_correction_type    multi-scan 
_exptl_absorpt_correction_T_min   0.2182 
_exptl_absorpt_correction_T_max   0.6891 
_exptl_absorpt_process_details    sadabs 
  
_exptl_special_details 
; 
 ? 
; 
  
_diffrn_ambient_temperature       296(2) 
_diffrn_radiation_wavelength      0.71073 
_diffrn_radiation_type            MoK\a 
_diffrn_radiation_source          'fine-focus sealed tube' 
_diffrn_radiation_monochromator   graphite 
_diffrn_measurement_device_type   'Bruker APEX-II CCD' 
_diffrn_measurement_method        '\f and \w scans' 
_diffrn_detector_area_resol_mean  ? 
_diffrn_reflns_number             81996 
_diffrn_reflns_av_R_equivalents   0.0314 
_diffrn_reflns_av_sigmaI/netI     0.0112 
_diffrn_reflns_limit_h_min        -12 
_diffrn_reflns_limit_h_max        12 
_diffrn_reflns_limit_k_min        -14 
_diffrn_reflns_limit_k_max        14 
_diffrn_reflns_limit_l_min        -16 
_diffrn_reflns_limit_l_max        16 
_diffrn_reflns_theta_min          1.65 
_diffrn_reflns_theta_max          27.10 
_reflns_number_total              5746 
_reflns_number_gt                 5647 
_reflns_threshold_expression      >2sigma(I) 
  
_computing_data_collection        'Bruker APEX2' 
_computing_cell_refinement        'Bruker SAINT' 
_computing_data_reduction         'Bruker SAINT' 
_computing_structure_solution     'SHELXS-97 (Sheldrick, 2008)' 
_computing_structure_refinement   'SHELXL-97 (Sheldrick, 2008)' 
_computing_molecular_graphics     'Bruker SHELXTL' 
_computing_publication_material   'Bruker SHELXTL' 
  
_refine_special_details 
; 
 Refinement of F^2^ against ALL reflections.  The weighted R-factor wR and 
 goodness of fit S are based on F^2^, conventional R-factors R are based 
 on F, with F set to zero for negative F^2^. The threshold expression of 
 F^2^ > 2sigma(F^2^) is used only for calculating R-factors(gt) etc. and is 
 not relevant to the choice of reflections for refinement.  R-factors based 
 on F^2^ are statistically about twice as large as those based on F, and R- 
 factors based on ALL data will be even larger. 
; 
  
_refine_ls_structure_factor_coef  Fsqd 
_refine_ls_matrix_type            full 
_refine_ls_weighting_scheme       calc 
_refine_ls_weighting_details 
 'calc w=1/[\s^2^(Fo^2^)+(0.0124P)^2^+6.8265P] where P=(Fo^2^+2Fc^2^)/3' 
_atom_sites_solution_primary      direct 
_atom_sites_solution_secondary    difmap 
_atom_sites_solution_hydrogens    geom 
_refine_ls_hydrogen_treatment     constr 
_refine_ls_extinction_method      none 
_refine_ls_extinction_coef        ? 
_refine_ls_number_reflns          5746 
_refine_ls_number_parameters      343 
_refine_ls_number_restraints      0 
_refine_ls_R_factor_all           0.0258 
_refine_ls_R_factor_gt            0.0252 
_refine_ls_wR_factor_ref          0.0606 
_refine_ls_wR_factor_gt           0.0600 
_refine_ls_goodness_of_fit_ref    1.164 
_refine_ls_restrained_S_all       1.164 
_refine_ls_shift/su_max           0.001 
_refine_ls_shift/su_mean          0.000 
  
loop_ 
 _atom_site_label 
 _atom_site_type_symbol 
 _atom_site_fract_x 
 _atom_site_fract_y 
 _atom_site_fract_z 
 _atom_site_U_iso_or_equiv 
 _atom_site_adp_type 
 _atom_site_occupancy 
 _atom_site_symmetry_multiplicity 
 _atom_site_calc_flag 
 _atom_site_refinement_flags 
 _atom_site_disorder_assembly 
 _atom_site_disorder_group 
B1 B 0.2358(5) 0.1931(4) 1.1589(4) 0.0236(9) Uani 1 1 d . . . 
P1 P 0.72812(9) 0.28123(8) 0.74942(7) 0.01197(16) Uani 1 1 d . . . 
Re1 Re 0.638659(16) 0.508352(13) 0.698339(11) 0.01471(5) Uani 1 1 d . . . 
N1 N 0.4303(3) 0.4601(3) 0.7661(2) 0.0165(6) Uani 1 1 d . . . 
N2 N 0.2985(3) 0.3148(3) 0.8186(3) 0.0192(6) Uani 1 1 d . . . 
F1 F 0.2860(4) 0.2281(3) 1.2298(2) 0.0474(8) Uani 1 1 d . . . 
F2 F 0.2581(4) 0.2669(3) 1.0585(2) 0.0455(7) Uani 1 1 d . . . 
F3 F 0.3193(3) 0.0673(2) 1.1496(3) 0.0423(7) Uani 1 1 d . . . 
F4 F 0.0829(3) 0.2089(2) 1.1971(3) 0.0431(7) Uani 1 1 d . . . 
O1 O 0.4712(4) 0.7982(3) 0.6433(3) 0.0335(7) Uani 1 1 d . . . 
O2 O 0.9520(4) 0.5389(3) 0.6257(2) 0.0302(7) Uani 1 1 d . . . 
O3 O 0.6765(3) 0.4799(3) 0.4605(2) 0.0254(6) Uani 1 1 d . . . 
O4 O 0.6295(4) 0.5314(3) 0.9339(2) 0.0296(6) Uani 1 1 d . . . 
C1 C 0.5317(5) 0.6923(4) 0.6645(3) 0.0227(8) Uani 1 1 d . . . 
C2 C 0.8324(5) 0.5311(4) 0.6522(3) 0.0204(7) Uani 1 1 d . . . 
C3 C 0.6586(4) 0.4887(3) 0.5486(3) 0.0178(7) Uani 1 1 d . . . 
C4 C 0.6297(4) 0.5249(3) 0.8500(3) 0.0202(7) Uani 1 1 d . . . 
C11 C 0.7508(4) 0.2218(3) 0.8880(3) 0.0141(6) Uani 1 1 d . . . 
C12 C 0.8879(4) 0.2039(4) 0.9098(3) 0.0270(9) Uani 1 1 d . . . 
H12 H 0.9663 0.2187 0.8532 0.032 Uiso 1 1 calc R . . 
C13 C 0.9088(5) 0.1641(5) 1.0148(3) 0.0314(10) Uani 1 1 d . . . 
H13 H 1.0008 0.1524 1.0287 0.038 Uiso 1 1 calc R . . 
C14 C 0.7929(5) 0.1421(4) 1.0986(3) 0.0236(8) Uani 1 1 d . . . 
H14 H 0.8070 0.1145 1.1690 0.028 Uiso 1 1 calc R . . 
C15 C 0.6554(4) 0.1610(4) 1.0783(3) 0.0210(7) Uani 1 1 d . . . 
H15 H 0.5773 0.1464 1.1353 0.025 Uiso 1 1 calc R . . 
C16 C 0.6334(4) 0.2015(3) 0.9735(3) 0.0176(7) Uani 1 1 d . . . 
H16 H 0.5403 0.2151 0.9603 0.021 Uiso 1 1 calc R . . 
C21 C 0.8964(4) 0.1835(3) 0.6679(3) 0.0150(7) Uani 1 1 d . . . 
C22 C 0.9452(4) 0.0521(3) 0.6997(3) 0.0187(7) Uani 1 1 d . . . 
H22 H 0.8932 0.0156 0.7634 0.022 Uiso 1 1 calc R . . 
C23 C 1.0716(4) -0.0233(4) 0.6355(3) 0.0237(8) Uani 1 1 d . . . 
H23 H 1.1043 -0.1108 0.6561 0.028 Uiso 1 1 calc R . . 
C24 C 1.1491(4) 0.0311(4) 0.5412(4) 0.0271(9) Uani 1 1 d . . . 
H24 H 1.2345 -0.0202 0.4991 0.033 Uiso 1 1 calc R . . 
C25 C 1.1015(5) 0.1604(4) 0.5086(3) 0.0265(8) Uani 1 1 d . . . 
H25 H 1.1539 0.1963 0.4447 0.032 Uiso 1 1 calc R . . 
C26 C 0.9744(4) 0.2370(4) 0.5723(3) 0.0196(7) Uani 1 1 d . . . 
H26 H 0.9416 0.3243 0.5508 0.024 Uiso 1 1 calc R . . 
C31 C 0.2858(4) 0.5642(4) 0.7956(3) 0.0229(8) Uani 1 1 d . . . 
H31A H 0.2464 0.6071 0.7311 0.028 Uiso 1 1 calc R . . 
H31B H 0.3055 0.6252 0.8218 0.028 Uiso 1 1 calc R . . 
C32 C 0.1688(4) 0.5189(4) 0.8805(3) 0.0215(8) Uani 1 1 d . . . 
H32A H 0.0731 0.5883 0.8901 0.026 Uiso 1 1 calc R . . 
H32B H 0.1995 0.4895 0.9490 0.026 Uiso 1 1 calc R . . 
C33 C 0.1493(4) 0.4121(4) 0.8475(3) 0.0251(8) Uani 1 1 d . . . 
H33A H 0.0839 0.3754 0.9070 0.030 Uiso 1 1 calc R . . 
H33B H 0.1023 0.4446 0.7859 0.030 Uiso 1 1 calc R . . 
C34 C 0.2992(4) 0.1872(4) 0.8211(3) 0.0218(8) Uani 1 1 d . . . 
H34A H 0.2026 0.1799 0.8638 0.026 Uiso 1 1 calc R . . 
H34B H 0.3775 0.1248 0.8565 0.026 Uiso 1 1 calc R . . 
C35 C 0.3268(4) 0.1583(4) 0.7082(3) 0.0236(8) Uani 1 1 d . . . 
H35A H 0.2890 0.0908 0.7149 0.028 Uiso 1 1 calc R . . 
H35B H 0.2690 0.2328 0.6654 0.028 Uiso 1 1 calc R . . 
C36 C 0.4927(4) 0.1196(4) 0.6475(3) 0.0191(7) Uani 1 1 d . . . 
H36A H 0.4989 0.1074 0.5758 0.023 Uiso 1 1 calc R . . 
H36B H 0.5475 0.0387 0.6853 0.023 Uiso 1 1 calc R . . 
C37 C 0.5723(4) 0.2138(3) 0.6353(3) 0.0166(7) Uani 1 1 d . . . 
H37A H 0.5235 0.2931 0.5926 0.020 Uiso 1 1 calc R . . 
H37B H 0.6770 0.1806 0.5965 0.020 Uiso 1 1 calc R . . 
C38 C 0.5680(4) 0.2385(3) 0.7466(3) 0.0129(6) Uani 1 1 d . . . 
H38 H 0.5669 0.1619 0.8000 0.015 Uiso 1 1 calc R . . 
C39 C 0.4240(4) 0.3452(3) 0.7810(3) 0.0158(7) Uani 1 1 d . . . 
  
loop_ 
 _atom_site_aniso_label 
 _atom_site_aniso_U_11 
 _atom_site_aniso_U_22 
 _atom_site_aniso_U_33 
 _atom_site_aniso_U_23 
 _atom_site_aniso_U_13 
 _atom_site_aniso_U_12 
B1 0.023(2) 0.021(2) 0.027(2) 0.0003(17) -0.0084(18) -0.0085(17) 
P1 0.0109(4) 0.0138(4) 0.0116(4) -0.0019(3) -0.0018(3) -0.0052(3) 
Re1 0.01706(7) 0.01269(7) 0.01455(7) -0.00214(5) -0.00651(5) -0.00313(5) 
N1 0.0149(14) 0.0156(14) 0.0169(14) -0.0037(11) -0.0050(11) -0.0014(11) 
N2 0.0124(14) 0.0249(16) 0.0205(15) -0.0087(13) -0.0028(12) -0.0040(12) 
F1 0.0498(18) 0.069(2) 0.0360(16) -0.0204(15) -0.0049(13) -0.0292(16) 
F2 0.0503(18) 0.0424(16) 0.0309(15) 0.0117(12) -0.0084(13) -0.0145(14) 
F3 0.0346(15) 0.0220(13) 0.065(2) -0.0065(13) -0.0122(14) -0.0042(11) 
F4 0.0223(13) 0.0243(13) 0.072(2) 0.0059(13) -0.0095(13) -0.0069(11) 
O1 0.0453(19) 0.0185(15) 0.0287(16) -0.0009(12) -0.0119(14) -0.0020(13) 
O2 0.0323(16) 0.0386(17) 0.0254(15) 0.0019(13) -0.0057(12) -0.0232(14) 
O3 0.0244(14) 0.0324(15) 0.0186(14) -0.0057(11) -0.0076(11) -0.0060(12) 
O4 0.0403(17) 0.0322(16) 0.0214(15) -0.0076(12) -0.0101(13) -0.0132(14) 
C1 0.028(2) 0.0200(19) 0.0184(18) -0.0021(14) -0.0069(15) -0.0059(16) 
C2 0.031(2) 0.0186(17) 0.0144(16) 0.0029(13) -0.0054(15) -0.0145(15) 
C3 0.0159(16) 0.0173(17) 0.0197(18) -0.0017(14) -0.0067(13) -0.0043(13) 
C4 0.0197(18) 0.0161(17) 0.026(2) -0.0050(14) -0.0070(15) -0.0045(14) 
C11 0.0143(16) 0.0151(16) 0.0127(15) -0.0022(12) -0.0034(13) -0.0047(13) 
C12 0.0167(18) 0.046(3) 0.0189(19) -0.0043(17) -0.0026(15) -0.0133(17) 
C13 0.0194(19) 0.052(3) 0.024(2) -0.0062(19) -0.0098(16) -0.0095(19) 
C14 0.027(2) 0.0247(19) 0.0156(17) -0.0026(15) -0.0096(15) -0.0026(16) 
C15 0.0231(18) 0.0245(19) 0.0141(17) -0.0024(14) -0.0003(14) -0.0100(15) 
C16 0.0154(16) 0.0213(17) 0.0166(17) -0.0022(14) -0.0037(13) -0.0073(14) 
C21 0.0123(15) 0.0175(16) 0.0154(16) -0.0051(13) -0.0032(13) -0.0036(13) 
C22 0.0193(17) 0.0182(17) 0.0194(17) -0.0020(14) -0.0064(14) -0.0062(14) 
C23 0.0216(19) 0.0183(18) 0.032(2) -0.0087(16) -0.0093(16) -0.0021(15) 
C24 0.0177(18) 0.033(2) 0.030(2) -0.0177(18) -0.0006(16) -0.0032(16) 
C25 0.0221(19) 0.033(2) 0.0213(19) -0.0091(16) 0.0034(15) -0.0097(17) 
C26 0.0184(17) 0.0207(18) 0.0177(17) -0.0021(14) -0.0006(14) -0.0081(14) 
C31 0.0204(18) 0.0174(17) 0.0254(19) -0.0057(15) -0.0056(15) 0.0010(15) 
C32 0.0169(17) 0.0232(19) 0.0189(18) -0.0074(15) -0.0032(14) 0.0008(14) 
C33 0.0116(17) 0.034(2) 0.029(2) -0.0106(17) -0.0032(15) -0.0042(15) 
C34 0.0141(16) 0.031(2) 0.0233(19) -0.0060(16) -0.0009(14) -0.0121(15) 
C35 0.0198(18) 0.031(2) 0.027(2) -0.0090(16) -0.0072(15) -0.0114(16) 
C36 0.0197(17) 0.0206(18) 0.0218(18) -0.0084(14) -0.0064(14) -0.0073(14) 
C37 0.0178(17) 0.0190(17) 0.0147(16) -0.0048(13) -0.0041(13) -0.0063(14) 
C38 0.0105(15) 0.0139(15) 0.0150(16) -0.0042(12) -0.0029(12) -0.0038(12) 
C39 0.0151(16) 0.0188(17) 0.0131(15) -0.0059(13) -0.0072(13) -0.0001(13) 
  
_geom_special_details 
; 
 All esds (except the esd in the dihedral angle between two l.s. planes) 
 are estimated using the full covariance matrix.  The cell esds are taken 
 into account individually in the estimation of esds in distances, angles 
 and torsion angles; correlations between esds in cell parameters are only 
 used when they are defined by crystal symmetry.  An approximate (isotropic) 
 treatment of cell esds is used for estimating esds involving l.s. planes. 
; 
  
loop_ 
 _geom_bond_atom_site_label_1 
 _geom_bond_atom_site_label_2 
 _geom_bond_distance 
 _geom_bond_site_symmetry_2 
 _geom_bond_publ_flag 
B1 F2 1.377(5) . ? 
B1 F1 1.386(5) . ? 
B1 F3 1.387(5) . ? 
B1 F4 1.388(5) . ? 
P1 C21 1.807(4) . ? 
P1 C11 1.817(3) . ? 
P1 C38 1.847(3) . ? 
P1 Re1 2.4117(9) . ? 
Re1 C2 1.922(4) . ? 
Re1 C1 1.977(4) . ? 
Re1 C3 1.980(4) . ? 
Re1 C4 2.023(4) . ? 
Re1 N1 2.204(3) . ? 
N1 C39 1.325(5) . ? 
N1 C31 1.483(5) . ? 
N2 C39 1.334(5) . ? 
N2 C33 1.472(5) . ? 
N2 C34 1.476(5) . ? 
O1 C1 1.138(5) . ? 
O2 C2 1.156(5) . ? 
O3 C3 1.142(5) . ? 
O4 C4 1.124(5) . ? 
C11 C16 1.391(5) . ? 
C11 C12 1.392(5) . ? 
C12 C13 1.386(6) . ? 
C13 C14 1.376(6) . ? 
C14 C15 1.384(6) . ? 
C15 C16 1.387(5) . ? 
C21 C26 1.388(5) . ? 
C21 C22 1.398(5) . ? 
C22 C23 1.386(5) . ? 
C23 C24 1.381(6) . ? 
C24 C25 1.378(6) . ? 
C25 C26 1.392(5) . ? 
C31 C32 1.495(5) . ? 
C32 C33 1.516(6) . ? 
C34 C35 1.527(5) . ? 
C35 C36 1.525(5) . ? 
C36 C37 1.535(5) . ? 
C37 C38 1.548(5) . ? 
C38 C39 1.510(5) . ? 
  
loop_ 
 _geom_angle_atom_site_label_1 
 _geom_angle_atom_site_label_2 
 _geom_angle_atom_site_label_3 
 _geom_angle 
 _geom_angle_site_symmetry_1 
 _geom_angle_site_symmetry_3 
 _geom_angle_publ_flag 
F2 B1 F1 109.4(4) . . ? 
F2 B1 F3 109.1(4) . . ? 
F1 B1 F3 108.6(4) . . ? 
F2 B1 F4 109.5(4) . . ? 
F1 B1 F4 110.3(4) . . ? 
F3 B1 F4 110.0(3) . . ? 
C21 P1 C11 104.85(16) . . ? 
C21 P1 C38 107.07(15) . . ? 
C11 P1 C38 103.90(16) . . ? 
C21 P1 Re1 120.84(12) . . ? 
C11 P1 Re1 115.93(11) . . ? 
C38 P1 Re1 102.67(11) . . ? 
C2 Re1 C1 91.73(16) . . ? 
C2 Re1 C3 89.00(15) . . ? 
C1 Re1 C3 90.63(15) . . ? 
C2 Re1 C4 88.51(15) . . ? 
C1 Re1 C4 90.82(15) . . ? 
C3 Re1 C4 177.15(15) . . ? 
C2 Re1 N1 172.42(13) . . ? 
C1 Re1 N1 94.87(14) . . ? 
C3 Re1 N1 94.63(13) . . ? 
C4 Re1 N1 87.69(13) . . ? 
C2 Re1 P1 97.70(11) . . ? 
C1 Re1 P1 170.56(12) . . ? 
C3 Re1 P1 89.75(11) . . ? 
C4 Re1 P1 89.22(11) . . ? 
N1 Re1 P1 75.70(8) . . ? 
C39 N1 C31 117.4(3) . . ? 
C39 N1 Re1 124.8(2) . . ? 
C31 N1 Re1 117.7(2) . . ? 
C39 N2 C33 120.8(3) . . ? 
C39 N2 C34 122.2(3) . . ? 
C33 N2 C34 116.6(3) . . ? 
O1 C1 Re1 178.9(4) . . ? 
O2 C2 Re1 176.9(3) . . ? 
O3 C3 Re1 176.2(3) . . ? 
O4 C4 Re1 177.7(4) . . ? 
C16 C11 C12 119.1(3) . . ? 
C16 C11 P1 122.4(3) . . ? 
C12 C11 P1 118.4(3) . . ? 
C13 C12 C11 120.7(4) . . ? 
C14 C13 C12 119.7(4) . . ? 
C13 C14 C15 120.2(4) . . ? 
C14 C15 C16 120.4(3) . . ? 
C15 C16 C11 119.8(3) . . ? 
C26 C21 C22 119.7(3) . . ? 
C26 C21 P1 120.8(3) . . ? 
C22 C21 P1 119.4(3) . . ? 
C23 C22 C21 119.5(4) . . ? 
C24 C23 C22 120.2(4) . . ? 
C25 C24 C23 120.8(4) . . ? 
C24 C25 C26 119.4(4) . . ? 
C21 C26 C25 120.3(4) . . ? 
N1 C31 C32 112.8(3) . . ? 
C31 C32 C33 110.2(3) . . ? 
N2 C33 C32 109.3(3) . . ? 
N2 C34 C35 112.8(3) . . ? 
C36 C35 C34 114.1(3) . . ? 
C35 C36 C37 115.4(3) . . ? 
C36 C37 C38 111.8(3) . . ? 
C39 C38 C37 109.3(3) . . ? 
C39 C38 P1 107.5(2) . . ? 
C37 C38 P1 114.9(2) . . ? 
N1 C39 N2 125.7(3) . . ? 
N1 C39 C38 118.7(3) . . ? 
N2 C39 C38 115.5(3) . . ? 
  
_diffrn_measured_fraction_theta_max    1.000 
_diffrn_reflns_theta_full              27.10 
_diffrn_measured_fraction_theta_full   1.000 
_refine_diff_density_max    5.867 
_refine_diff_density_min   -2.420 
_refine_diff_density_rms    0.127

#===END
 
data_8 
  
_audit_creation_method            SHELXL-97 
_chemical_name_systematic 
; 
 ? 
; 
_chemical_name_common             ? 
_chemical_melting_point           ? 
_chemical_formula_moiety          ? 
_chemical_formula_sum 
 'C33 H31 B2 F8 N3 O5 P Re' 
_chemical_formula_weight          940.40 
  
loop_ 
 _atom_type_symbol 
 _atom_type_description 
 _atom_type_scat_dispersion_real 
 _atom_type_scat_dispersion_imag 
 _atom_type_scat_source 
 'C'  'C'   0.0033   0.0016 
 'International Tables Vol C Tables 4.2.6.8 and 6.1.1.4' 
 'H'  'H'   0.0000   0.0000 
 'International Tables Vol C Tables 4.2.6.8 and 6.1.1.4' 
 'B'  'B'   0.0013   0.0007 
 'International Tables Vol C Tables 4.2.6.8 and 6.1.1.4' 
 'N'  'N'   0.0061   0.0033 
 'International Tables Vol C Tables 4.2.6.8 and 6.1.1.4' 
 'O'  'O'   0.0106   0.0060 
 'International Tables Vol C Tables 4.2.6.8 and 6.1.1.4' 
 'F'  'F'   0.0171   0.0103 
 'International Tables Vol C Tables 4.2.6.8 and 6.1.1.4' 
 'P'  'P'   0.1023   0.0942 
 'International Tables Vol C Tables 4.2.6.8 and 6.1.1.4' 
 'Re'  'Re'  -1.0185   7.2310 
 'International Tables Vol C Tables 4.2.6.8 and 6.1.1.4' 
  
_symmetry_cell_setting            Monoclinic 
_symmetry_space_group_name_H-M    P2(1)/c 
  
loop_ 
 _symmetry_equiv_pos_as_xyz 
 'x, y, z' 
 '-x, y+1/2, -z+1/2' 
 '-x, -y, -z' 
 'x, -y-1/2, z-1/2' 
  
_cell_length_a                    21.3943(7) 
_cell_length_b                    35.6316(12) 
_cell_length_c                    9.4989(3) 
_cell_angle_alpha                 90.00 
_cell_angle_beta                  98.482(2) 
_cell_angle_gamma                 90.00 
_cell_volume                      7161.9(4) 
_cell_formula_units_Z             8 
_cell_measurement_temperature     100(2) 
_cell_measurement_reflns_used     9245 
_cell_measurement_theta_min       2.91 
_cell_measurement_theta_max       32.55 
  
_exptl_crystal_description        plate 
_exptl_crystal_colour             colorless 
_exptl_crystal_size_max           0.28 
_exptl_crystal_size_mid           0.27 
_exptl_crystal_size_min           0.07 
_exptl_crystal_density_meas       ? 
_exptl_crystal_density_diffrn     1.744 
_exptl_crystal_density_method     'not measured' 
_exptl_crystal_F_000              3696 
_exptl_absorpt_coefficient_mu     3.525 
_exptl_absorpt_correction_type    multi-scan 
_exptl_absorpt_correction_T_min   0.4386 
_exptl_absorpt_correction_T_max   0.7905 
_exptl_absorpt_process_details    sadabs 
  
_exptl_special_details 
; 
 ? 
; 
  
_diffrn_ambient_temperature       100(2) 
_diffrn_radiation_wavelength      0.71073 
_diffrn_radiation_type            MoK\a 
_diffrn_radiation_source          'fine-focus sealed tube' 
_diffrn_radiation_monochromator   graphite 
_diffrn_measurement_device_type   'Bruker APEX-II CCD' 
_diffrn_measurement_method        '\f and \w scans' 
_diffrn_detector_area_resol_mean  ? 
_diffrn_reflns_number             373285 
_diffrn_reflns_av_R_equivalents   0.0879 
_diffrn_reflns_av_sigmaI/netI     0.0370 
_diffrn_reflns_limit_h_min        -32 
_diffrn_reflns_limit_h_max        32 
_diffrn_reflns_limit_k_min        -54 
_diffrn_reflns_limit_k_max        54 
_diffrn_reflns_limit_l_min        -14 
_diffrn_reflns_limit_l_max        14 
_diffrn_reflns_theta_min          0.96 
_diffrn_reflns_theta_max          33.14 
_reflns_number_total              27317 
_reflns_number_gt                 21868 
_reflns_threshold_expression      >2sigma(I) 
  
_computing_data_collection        'Bruker APEX2' 
_computing_cell_refinement        'Bruker SAINT' 
_computing_data_reduction         'Bruker SAINT' 
_computing_structure_solution     'SHELXS-97 (Sheldrick, 2008)' 
_computing_structure_refinement   'SHELXL-97 (Sheldrick, 2008)' 
_computing_molecular_graphics     'Bruker SHELXTL' 
_computing_publication_material   'Bruker SHELXTL' 
  
_refine_special_details 
; 
 Refinement of F^2^ against ALL reflections.  The weighted R-factor wR and 
 goodness of fit S are based on F^2^, conventional R-factors R are based 
 on F, with F set to zero for negative F^2^. The threshold expression of 
 F^2^ > 2sigma(F^2^) is used only for calculating R-factors(gt) etc. and is 
 not relevant to the choice of reflections for refinement.  R-factors based 
 on F^2^ are statistically about twice as large as those based on F, and R- 
 factors based on ALL data will be even larger. 
; 
  
_refine_ls_structure_factor_coef  Fsqd 
_refine_ls_matrix_type            full 
_refine_ls_weighting_scheme       calc 
_refine_ls_weighting_details 
 'calc w=1/[\s^2^(Fo^2^)+(0.0138P)^2^+44.1649P] where P=(Fo^2^+2Fc^2^)/3' 
_atom_sites_solution_primary      direct 
_atom_sites_solution_secondary    difmap 
_atom_sites_solution_hydrogens    geom 
_refine_ls_hydrogen_treatment     mixed 
_refine_ls_extinction_method      none 
_refine_ls_extinction_coef        ? 
_refine_ls_number_reflns          27317 
_refine_ls_number_parameters      971 
_refine_ls_number_restraints      0 
_refine_ls_R_factor_all           0.0649 
_refine_ls_R_factor_gt            0.0471 
_refine_ls_wR_factor_ref          0.0926 
_refine_ls_wR_factor_gt           0.0860 
_refine_ls_goodness_of_fit_ref    1.136 
_refine_ls_restrained_S_all       1.136 
_refine_ls_shift/su_max           0.005 
_refine_ls_shift/su_mean          0.000 
  
loop_ 
 _atom_site_label 
 _atom_site_type_symbol 
 _atom_site_fract_x 
 _atom_site_fract_y 
 _atom_site_fract_z 
 _atom_site_U_iso_or_equiv 
 _atom_site_adp_type 
 _atom_site_occupancy 
 _atom_site_symmetry_multiplicity 
 _atom_site_calc_flag 
 _atom_site_refinement_flags 
 _atom_site_disorder_assembly 
 _atom_site_disorder_group 
Re1 Re 0.690142(6) 0.070314(4) 0.739994(14) 0.01046(3) Uani 1 1 d . . . 
Re2 Re 0.815504(6) -0.085065(4) 0.264624(15) 0.01136(3) Uani 1 1 d . . . 
P1 P 0.58848(4) 0.09727(2) 0.79683(9) 0.00955(15) Uani 1 1 d . . . 
P2 P 0.92187(4) -0.10533(2) 0.21181(9) 0.01045(15) Uani 1 1 d . . . 
O1 O 0.81585(13) 0.03303(10) 0.6828(3) 0.0254(6) Uani 1 1 d . . . 
O2 O 0.71543(15) 0.13664(8) 0.5378(3) 0.0213(6) Uani 1 1 d . . . 
O3 O 0.62975(14) 0.02782(9) 0.4635(3) 0.0238(6) Uani 1 1 d . . . 
O4 O 0.67403(14) 0.00062(8) 0.9355(3) 0.0221(6) Uani 1 1 d . . . 
O5 O 0.75987(15) 0.11669(12) 0.9986(3) 0.0345(8) Uani 1 1 d . . . 
O6 O 0.86949(15) -0.04107(9) 0.5433(3) 0.0262(7) Uani 1 1 d . . . 
O7 O 0.82502(14) -0.01625(8) 0.0606(3) 0.0210(6) Uani 1 1 d . . . 
O8 O 0.79991(15) -0.15334(8) 0.4668(3) 0.0218(6) Uani 1 1 d . . . 
O9 O 0.68483(15) -0.05294(11) 0.3155(4) 0.0341(8) Uani 1 1 d . . . 
O10 O 0.74659(17) -0.13478(11) 0.0147(3) 0.0354(8) Uani 1 1 d . . . 
C1 C 0.77112(19) 0.04707(12) 0.7033(4) 0.0191(7) Uani 1 1 d . . . 
C1S C 0.7463(3) -0.2504(2) 0.4130(6) 0.0519(17) Uani 1 1 d . . . 
H1S1 H 0.7063 -0.2581 0.4431 0.078 Uiso 1 1 calc R . . 
H1S2 H 0.7556 -0.2669 0.3361 0.078 Uiso 1 1 calc R . . 
H1S3 H 0.7429 -0.2244 0.3790 0.078 Uiso 1 1 calc R . . 
C2 C 0.70575(17) 0.11337(10) 0.6122(4) 0.0145(6) Uani 1 1 d . . . 
C2S C 0.7960(2) -0.25319(16) 0.5309(6) 0.0353(11) Uani 1 1 d . . . 
C3 C 0.64974(16) 0.04272(10) 0.5658(4) 0.0147(6) Uani 1 1 d . . . 
C3S C 0.7539(4) 0.23707(17) 0.4438(7) 0.0516(16) Uani 1 1 d . . . 
H3S1 H 0.7909 0.2463 0.4045 0.077 Uiso 1 1 calc R . . 
H3S2 H 0.7222 0.2280 0.3662 0.077 Uiso 1 1 calc R . . 
H3S3 H 0.7667 0.2165 0.5102 0.077 Uiso 1 1 calc R . . 
C4 C 0.67945(16) 0.02578(11) 0.8662(4) 0.0147(6) Uani 1 1 d . . . 
C4S C 0.7276(2) 0.26707(15) 0.5178(6) 0.0330(10) Uani 1 1 d . . . 
C5 C 0.73529(17) 0.09973(12) 0.9075(4) 0.0182(7) Uani 1 1 d . . . 
C6 C 0.85174(17) -0.05604(11) 0.4395(4) 0.0154(6) Uani 1 1 d . . . 
C7 C 0.82205(16) -0.04073(11) 0.1346(4) 0.0147(6) Uani 1 1 d . . . 
C8 C 0.80631(17) -0.12912(10) 0.3928(4) 0.0142(6) Uani 1 1 d . . . 
C9 C 0.73124(18) -0.06525(12) 0.2987(4) 0.0203(8) Uani 1 1 d . . . 
C10 C 0.77212(18) -0.11668(13) 0.1018(4) 0.0202(8) Uani 1 1 d . . . 
C11 C 0.52696(15) 0.06296(10) 0.8168(4) 0.0115(6) Uani 1 1 d . . . 
C12 C 0.52672(16) 0.02739(10) 0.7560(4) 0.0134(6) Uani 1 1 d . . . 
H12 H 0.5582 0.0208 0.6994 0.016 Uiso 1 1 calc R . . 
C13 C 0.48062(18) 0.00142(11) 0.7778(4) 0.0172(7) Uani 1 1 d . . . 
H13 H 0.4807 -0.0228 0.7357 0.021 Uiso 1 1 calc R . . 
C14 C 0.43464(17) 0.01046(11) 0.8603(4) 0.0169(7) Uani 1 1 d . . . 
H14 H 0.4028 -0.0073 0.8729 0.020 Uiso 1 1 calc R . . 
C15 C 0.43504(18) 0.04562(11) 0.9250(4) 0.0171(7) Uani 1 1 d . . . 
H15 H 0.4040 0.0517 0.9833 0.021 Uiso 1 1 calc R . . 
C16 C 0.48087(16) 0.07176(10) 0.9038(4) 0.0133(6) Uani 1 1 d . . . 
H16 H 0.4812 0.0957 0.9480 0.016 Uiso 1 1 calc R . . 
C21 C 0.59629(16) 0.11871(10) 0.9743(4) 0.0114(6) Uani 1 1 d . . . 
C22 C 0.63032(17) 0.09892(11) 1.0870(4) 0.0144(6) Uani 1 1 d . . . 
H22 H 0.6497 0.0758 1.0690 0.017 Uiso 1 1 calc R . . 
C23 C 0.63627(19) 0.11265(11) 1.2253(4) 0.0181(7) Uani 1 1 d . . . 
H23 H 0.6599 0.0991 1.3011 0.022 Uiso 1 1 calc R . . 
C24 C 0.60738(19) 0.14642(12) 1.2523(4) 0.0188(7) Uani 1 1 d . . . 
H24 H 0.6124 0.1562 1.3463 0.023 Uiso 1 1 calc R . . 
C25 C 0.57152(19) 0.16569(11) 1.1427(4) 0.0188(7) Uani 1 1 d . . . 
H25 H 0.5507 0.1883 1.1620 0.023 Uiso 1 1 calc R . . 
C26 C 0.56580(17) 0.15199(10) 1.0029(4) 0.0153(6) Uani 1 1 d . . . 
H26 H 0.5412 0.1653 0.9277 0.018 Uiso 1 1 calc R . . 
C31 C 0.56275(16) 0.13787(10) 0.6795(4) 0.0117(6) Uani 1 1 d . . . 
C32 C 0.60852(17) 0.16735(10) 0.7132(4) 0.0152(6) Uani 1 1 d . . . 
H32 H 0.6430 0.1635 0.7871 0.018 Uiso 1 1 calc R . . 
C33 C 0.60364(17) 0.20046(10) 0.6421(4) 0.0144(6) Uani 1 1 d . . . 
H33 H 0.6352 0.2191 0.6653 0.017 Uiso 1 1 calc R . . 
C34 C 0.55213(17) 0.20756(10) 0.5336(4) 0.0140(6) Uani 1 1 d . . . 
C35 C 0.50583(16) 0.17873(10) 0.4960(4) 0.0111(6) Uani 1 1 d . . . 
C36 C 0.51329(16) 0.14314(9) 0.5691(4) 0.0104(6) Uani 1 1 d . . . 
C37 C 0.54798(19) 0.24270(10) 0.4628(4) 0.0176(7) Uani 1 1 d . . . 
H37 H 0.5802 0.2609 0.4874 0.021 Uiso 1 1 calc R . . 
C38 C 0.4984(2) 0.25060(11) 0.3598(5) 0.0215(8) Uani 1 1 d . . . 
H38 H 0.4953 0.2745 0.3150 0.026 Uiso 1 1 calc R . . 
C39 C 0.45167(19) 0.22332(11) 0.3203(4) 0.0189(7) Uani 1 1 d . . . 
H39 H 0.4170 0.2288 0.2487 0.023 Uiso 1 1 calc R . . 
C40 C 0.45582(17) 0.18877(10) 0.3845(4) 0.0141(6) Uani 1 1 d . . . 
C41 C 0.95676(16) -0.14223(9) 0.3371(4) 0.0119(6) Uani 1 1 d . . . 
C42 C 0.91976(17) -0.17573(10) 0.3107(4) 0.0148(6) Uani 1 1 d . . . 
H42 H 0.8854 -0.1760 0.2349 0.018 Uiso 1 1 calc R . . 
C43 C 0.93242(18) -0.20719(10) 0.3911(4) 0.0157(7) Uani 1 1 d . . . 
H43 H 0.9068 -0.2288 0.3708 0.019 Uiso 1 1 calc R . . 
C44 C 0.98324(18) -0.20801(10) 0.5044(4) 0.0152(6) Uani 1 1 d . . . 
C45 C 1.02116(16) -0.17532(10) 0.5351(4) 0.0130(6) Uani 1 1 d . . . 
C46 C 1.00621(16) -0.14170(10) 0.4497(4) 0.0121(6) Uani 1 1 d . . . 
C47 C 0.9949(2) -0.24120(11) 0.5872(4) 0.0195(7) Uani 1 1 d . . . 
H47 H 0.9676 -0.2622 0.5676 0.023 Uiso 1 1 calc R . . 
C48 C 1.0445(2) -0.24337(12) 0.6942(5) 0.0232(8) Uani 1 1 d . . . 
H48 H 1.0532 -0.2661 0.7456 0.028 Uiso 1 1 calc R . . 
C49 C 1.08286(19) -0.21183(12) 0.7281(4) 0.0212(8) Uani 1 1 d . . . 
H49 H 1.1170 -0.2131 0.8041 0.025 Uiso 1 1 calc R . . 
C50 C 1.07159(17) -0.17906(11) 0.6528(4) 0.0161(7) Uani 1 1 d . . . 
C51 C 0.97639(15) -0.06734(10) 0.1849(4) 0.0130(6) Uani 1 1 d . . . 
C52 C 0.97075(17) -0.03150(10) 0.2418(4) 0.0156(7) Uani 1 1 d . . . 
H52 H 0.9379 -0.0264 0.2964 0.019 Uiso 1 1 calc R . . 
C53 C 1.01316(18) -0.00326(11) 0.2185(4) 0.0185(7) Uani 1 1 d . . . 
H53 H 1.0098 0.0208 0.2598 0.022 Uiso 1 1 calc R . . 
C54 C 1.06007(18) -0.00995(11) 0.1358(4) 0.0192(7) Uani 1 1 d . . . 
H54 H 1.0889 0.0094 0.1208 0.023 Uiso 1 1 calc R . . 
C55 C 1.06498(17) -0.04508(11) 0.0747(4) 0.0172(7) Uani 1 1 d . . . 
H55 H 1.0967 -0.0495 0.0164 0.021 Uiso 1 1 calc R . . 
C56 C 1.02383(17) -0.07357(11) 0.0985(4) 0.0165(7) Uani 1 1 d . . . 
H56 H 1.0275 -0.0975 0.0565 0.020 Uiso 1 1 calc R . . 
C61 C 0.91689(16) -0.12831(10) 0.0373(4) 0.0129(6) Uani 1 1 d . . . 
C62 C 0.87814(17) -0.11152(11) -0.0761(4) 0.0154(6) Uani 1 1 d . . . 
H62 H 0.8559 -0.0892 -0.0602 0.018 Uiso 1 1 calc R . . 
C63 C 0.87148(19) -0.12689(13) -0.2121(4) 0.0203(7) Uani 1 1 d . . . 
H63 H 0.8444 -0.1154 -0.2883 0.024 Uiso 1 1 calc R . . 
C64 C 0.9049(2) -0.15938(12) -0.2355(4) 0.0218(8) Uani 1 1 d . . . 
H64 H 0.8999 -0.1706 -0.3272 0.026 Uiso 1 1 calc R . . 
C65 C 0.9456(2) -0.17515(12) -0.1242(4) 0.0196(7) Uani 1 1 d . . . 
H65 H 0.9693 -0.1968 -0.1412 0.024 Uiso 1 1 calc R . . 
C66 C 0.95220(18) -0.15995(10) 0.0115(4) 0.0156(6) Uani 1 1 d . . . 
H66 H 0.9806 -0.1710 0.0865 0.019 Uiso 1 1 calc R . . 
C101 C 0.34224(18) 0.17240(13) 0.3677(5) 0.0225(8) Uani 1 1 d . . . 
H10A H 0.3450 0.1765 0.4704 0.034 Uiso 1 1 calc R . . 
H10B H 0.3116 0.1524 0.3381 0.034 Uiso 1 1 calc R . . 
H10C H 0.3286 0.1956 0.3169 0.034 Uiso 1 1 calc R . . 
C102 C 0.4027(2) 0.15246(13) 0.1785(4) 0.0227(8) Uani 1 1 d . . . 
H10D H 0.3889 0.1748 0.1223 0.034 Uiso 1 1 calc R . . 
H10E H 0.3725 0.1320 0.1525 0.034 Uiso 1 1 calc R . . 
H10F H 0.4446 0.1449 0.1592 0.034 Uiso 1 1 calc R . . 
C201 C 0.49461(17) 0.08325(11) 0.4404(4) 0.0160(7) Uani 1 1 d . . . 
H20A H 0.5235 0.0932 0.3785 0.024 Uiso 1 1 calc R . . 
H20B H 0.4603 0.0694 0.3828 0.024 Uiso 1 1 calc R . . 
H20C H 0.5177 0.0663 0.5109 0.024 Uiso 1 1 calc R . . 
C202 C 0.41865(16) 0.10277(11) 0.5986(4) 0.0146(6) Uani 1 1 d . . . 
H20D H 0.4180 0.1203 0.6780 0.022 Uiso 1 1 calc R . . 
H20E H 0.4280 0.0774 0.6360 0.022 Uiso 1 1 calc R . . 
H20F H 0.3774 0.1029 0.5382 0.022 Uiso 1 1 calc R . . 
C301 C 1.1026(2) -0.13331(15) 0.8435(4) 0.0276(9) Uani 1 1 d . . . 
H30A H 1.0577 -0.1283 0.8452 0.041 Uiso 1 1 calc R . . 
H30B H 1.1269 -0.1102 0.8663 0.041 Uiso 1 1 calc R . . 
H30C H 1.1173 -0.1526 0.9141 0.041 Uiso 1 1 calc R . . 
C302 C 1.18007(17) -0.15307(13) 0.6862(5) 0.0219(8) Uani 1 1 d . . . 
H30D H 1.1982 -0.1712 0.7587 0.033 Uiso 1 1 calc R . . 
H30E H 1.2031 -0.1293 0.7005 0.033 Uiso 1 1 calc R . . 
H30F H 1.1836 -0.1630 0.5914 0.033 Uiso 1 1 calc R . . 
C401 C 1.09250(18) -0.09594(12) 0.4123(4) 0.0197(7) Uani 1 1 d . . . 
H40A H 1.0988 -0.1149 0.3408 0.030 Uiso 1 1 calc R . . 
H40B H 1.1324 -0.0917 0.4753 0.030 Uiso 1 1 calc R . . 
H40C H 1.0783 -0.0724 0.3645 0.030 Uiso 1 1 calc R . . 
C402 C 1.01184(19) -0.07935(11) 0.5620(4) 0.0199(7) Uani 1 1 d . . . 
H40D H 0.9869 -0.0644 0.4875 0.030 Uiso 1 1 calc R . . 
H40E H 1.0430 -0.0632 0.6189 0.030 Uiso 1 1 calc R . . 
H40F H 0.9838 -0.0904 0.6236 0.030 Uiso 1 1 calc R . . 
N1 N 0.40569(14) 0.16116(9) 0.3336(3) 0.0142(6) Uani 1 1 d . . . 
H1N H 0.421(2) 0.1397(14) 0.386(5) 0.017 Uiso 1 1 d . . . 
N1S N 0.8347(3) -0.2536(2) 0.6268(6) 0.0668(19) Uani 1 1 d . . . 
N2 N 0.46800(13) 0.11445(8) 0.5137(3) 0.0107(5) Uani 1 1 d . . . 
N2S N 0.7062(2) 0.29000(17) 0.5784(6) 0.0521(14) Uani 1 1 d . . . 
N3 N 1.11169(15) -0.14667(10) 0.6985(4) 0.0174(6) Uani 1 1 d . . . 
H2N H 1.093(2) -0.1261(14) 0.632(5) 0.021 Uiso 1 1 d . . . 
N4 N 1.04443(14) -0.10928(9) 0.4965(3) 0.0133(5) Uani 1 1 d . . . 
F1 F 0.34342(16) 0.07817(11) 0.2732(4) 0.0489(9) Uani 1 1 d . . . 
F2 F 0.2945(2) 0.02832(8) 0.3491(4) 0.0480(9) Uani 1 1 d . . . 
F3 F 0.24643(17) 0.06281(11) 0.1658(3) 0.0545(11) Uani 1 1 d . . . 
F4 F 0.25966(13) 0.08665(8) 0.3895(3) 0.0286(6) Uani 1 1 d . . . 
F5 F 0.41368(16) 0.16206(10) 0.8733(3) 0.0432(8) Uani 1 1 d . . . 
F6 F 0.34509(16) 0.20950(9) 0.8910(3) 0.0391(7) Uani 1 1 d . . . 
F7 F 0.31564(14) 0.16016(9) 0.7425(3) 0.0390(7) Uani 1 1 d . . . 
F8 F 0.38832(16) 0.20134(9) 0.6883(3) 0.0390(7) Uani 1 1 d . . . 
F9 F 1.2034(3) -0.01056(11) 0.6476(5) 0.0873(19) Uani 1 1 d . . . 
F10 F 1.1595(2) -0.05950(16) 0.7354(5) 0.0829(17) Uani 1 1 d . . . 
F11 F 1.2554(2) -0.04323(14) 0.8296(4) 0.0829(18) Uani 1 1 d . . . 
F12 F 1.23839(13) -0.06787(7) 0.6079(3) 0.0263(5) Uani 1 1 d . . . 
F13 F 1.1633(2) -0.13978(10) 0.1943(4) 0.0599(11) Uani 1 1 d . . . 
F14 F 1.23026(19) -0.18773(13) 0.2415(4) 0.0629(12) Uani 1 1 d . . . 
F15 F 1.13812(17) -0.18719(10) 0.3352(3) 0.0444(8) Uani 1 1 d . . . 
F16 F 1.13851(18) -0.19749(10) 0.0975(3) 0.0461(9) Uani 1 1 d . . . 
B1 B 0.2855(2) 0.06363(13) 0.2945(5) 0.0187(8) Uani 1 1 d . . . 
B2 B 0.3647(2) 0.18332(14) 0.8007(5) 0.0216(9) Uani 1 1 d . . . 
B3 B 1.2151(2) -0.04437(13) 0.7061(5) 0.0202(8) Uani 1 1 d . . . 
B4 B 1.1660(3) -0.17792(18) 0.2169(6) 0.0354(13) Uani 1 1 d . . . 
  
loop_ 
 _atom_site_aniso_label 
 _atom_site_aniso_U_11 
 _atom_site_aniso_U_22 
 _atom_site_aniso_U_33 
 _atom_site_aniso_U_23 
 _atom_site_aniso_U_13 
 _atom_site_aniso_U_12 
Re1 0.00813(5) 0.01323(6) 0.00950(5) 0.00068(5) -0.00042(4) -0.00116(4) 
Re2 0.00876(5) 0.01316(6) 0.01157(6) 0.00170(5) -0.00049(4) -0.00128(5) 
P1 0.0080(3) 0.0096(4) 0.0103(4) 0.0008(3) -0.0012(3) -0.0010(3) 
P2 0.0098(3) 0.0093(4) 0.0114(4) -0.0005(3) -0.0013(3) 0.0001(3) 
O1 0.0112(12) 0.0392(19) 0.0258(15) 0.0030(13) 0.0031(11) 0.0040(12) 
O2 0.0319(16) 0.0170(13) 0.0158(13) 0.0020(10) 0.0063(11) -0.0040(11) 
O3 0.0193(13) 0.0273(16) 0.0226(14) -0.0111(12) -0.0037(11) -0.0003(11) 
O4 0.0262(15) 0.0196(14) 0.0221(14) 0.0079(11) 0.0088(11) 0.0044(11) 
O5 0.0203(15) 0.062(2) 0.0206(15) -0.0147(15) 0.0009(12) -0.0175(15) 
O6 0.0225(14) 0.0307(17) 0.0246(15) -0.0126(13) 0.0013(12) -0.0012(12) 
O7 0.0239(14) 0.0182(14) 0.0224(14) 0.0066(11) 0.0081(11) 0.0034(11) 
O8 0.0304(15) 0.0177(14) 0.0175(13) 0.0041(11) 0.0048(11) -0.0021(11) 
O9 0.0159(14) 0.053(2) 0.0350(18) 0.0167(16) 0.0087(13) 0.0079(14) 
O10 0.0322(18) 0.053(2) 0.0198(15) -0.0089(15) 0.0005(13) -0.0217(16) 
C1 0.0204(17) 0.0216(19) 0.0139(16) 0.0037(14) -0.0019(13) 0.0008(14) 
C1S 0.040(3) 0.085(5) 0.028(3) 0.008(3) -0.001(2) -0.022(3) 
C2 0.0146(15) 0.0144(16) 0.0144(15) -0.0027(12) 0.0023(12) -0.0001(12) 
C2S 0.027(2) 0.046(3) 0.034(3) 0.012(2) 0.0088(19) 0.004(2) 
C3 0.0100(14) 0.0145(16) 0.0193(16) 0.0016(13) 0.0010(12) 0.0014(12) 
C3S 0.085(5) 0.031(3) 0.042(3) 0.001(2) 0.018(3) 0.012(3) 
C4 0.0100(14) 0.0170(17) 0.0169(16) 0.0006(13) 0.0012(12) 0.0031(12) 
C4S 0.032(2) 0.028(2) 0.038(3) -0.003(2) 0.004(2) -0.0017(19) 
C5 0.0130(15) 0.029(2) 0.0130(15) 0.0008(14) 0.0018(12) -0.0048(14) 
C6 0.0134(15) 0.0140(16) 0.0193(16) -0.0011(13) 0.0040(12) 0.0008(12) 
C7 0.0088(13) 0.0179(17) 0.0174(16) 0.0017(13) 0.0024(12) 0.0032(12) 
C8 0.0153(15) 0.0149(16) 0.0118(14) -0.0009(12) -0.0003(12) -0.0002(12) 
C9 0.0157(16) 0.024(2) 0.0201(18) 0.0117(15) -0.0028(13) -0.0025(14) 
C10 0.0146(16) 0.030(2) 0.0149(16) 0.0021(15) -0.0003(13) -0.0076(15) 
C11 0.0096(13) 0.0108(15) 0.0135(14) 0.0007(11) -0.0010(11) -0.0011(11) 
C12 0.0105(14) 0.0146(16) 0.0147(15) -0.0022(12) -0.0001(11) -0.0013(12) 
C13 0.0156(16) 0.0152(17) 0.0196(17) -0.0012(13) -0.0014(13) -0.0031(13) 
C14 0.0130(15) 0.0185(18) 0.0186(17) 0.0039(14) 0.0006(12) -0.0067(13) 
C15 0.0143(15) 0.0191(18) 0.0177(16) 0.0020(13) 0.0016(13) -0.0021(13) 
C16 0.0125(14) 0.0136(15) 0.0135(15) 0.0013(12) 0.0007(11) -0.0004(12) 
C21 0.0108(13) 0.0109(14) 0.0122(14) -0.0020(11) 0.0005(11) -0.0014(11) 
C22 0.0145(15) 0.0146(16) 0.0141(15) 0.0000(12) 0.0017(12) 0.0020(12) 
C23 0.0219(17) 0.0197(18) 0.0127(15) -0.0007(13) 0.0027(13) 0.0028(14) 
C24 0.0202(17) 0.0204(18) 0.0166(16) -0.0044(14) 0.0050(13) -0.0002(14) 
C25 0.0193(17) 0.0162(17) 0.0219(18) -0.0050(14) 0.0067(14) 0.0007(13) 
C26 0.0134(15) 0.0138(16) 0.0180(16) 0.0001(13) 0.0000(12) 0.0008(12) 
C31 0.0126(14) 0.0097(14) 0.0123(14) 0.0001(11) 0.0008(11) -0.0004(11) 
C32 0.0124(14) 0.0143(16) 0.0175(16) 0.0007(13) -0.0018(12) -0.0027(12) 
C33 0.0167(15) 0.0089(14) 0.0172(16) -0.0004(12) 0.0012(12) -0.0037(12) 
C34 0.0176(15) 0.0087(14) 0.0155(15) 0.0005(12) 0.0020(12) 0.0010(12) 
C35 0.0121(14) 0.0104(14) 0.0107(14) 0.0001(11) 0.0009(11) 0.0021(11) 
C36 0.0116(13) 0.0075(13) 0.0119(14) -0.0007(11) 0.0012(11) -0.0009(11) 
C37 0.0214(17) 0.0096(15) 0.0218(18) 0.0022(13) 0.0035(14) -0.0010(13) 
C38 0.0244(19) 0.0133(17) 0.026(2) 0.0064(14) 0.0019(15) 0.0011(14) 
C39 0.0185(17) 0.0177(18) 0.0197(17) 0.0034(14) -0.0002(13) 0.0016(14) 
C40 0.0156(15) 0.0136(16) 0.0130(15) 0.0017(12) 0.0016(12) 0.0010(12) 
C41 0.0124(14) 0.0081(14) 0.0147(15) -0.0013(11) 0.0004(11) 0.0005(11) 
C42 0.0166(15) 0.0107(15) 0.0163(16) -0.0008(12) -0.0008(12) -0.0020(12) 
C43 0.0229(17) 0.0078(14) 0.0169(16) -0.0029(12) 0.0040(13) -0.0015(12) 
C44 0.0177(16) 0.0103(15) 0.0178(16) -0.0011(12) 0.0036(13) 0.0033(12) 
C45 0.0112(14) 0.0123(15) 0.0158(15) 0.0008(12) 0.0032(12) 0.0040(11) 
C46 0.0113(14) 0.0106(14) 0.0148(15) -0.0007(12) 0.0031(11) 0.0011(11) 
C47 0.0270(19) 0.0101(16) 0.0227(18) 0.0038(13) 0.0083(15) 0.0033(14) 
C48 0.028(2) 0.0197(19) 0.0227(19) 0.0088(15) 0.0067(16) 0.0092(16) 
C49 0.0195(17) 0.025(2) 0.0189(18) 0.0085(15) 0.0040(14) 0.0063(15) 
C50 0.0140(15) 0.0198(18) 0.0143(15) 0.0025(13) 0.0016(12) 0.0029(13) 
C51 0.0084(13) 0.0131(15) 0.0163(15) 0.0019(12) -0.0018(11) -0.0025(11) 
C52 0.0117(14) 0.0133(16) 0.0213(17) -0.0015(13) 0.0005(12) -0.0018(12) 
C53 0.0172(16) 0.0125(16) 0.0248(19) -0.0014(14) -0.0005(14) -0.0041(13) 
C54 0.0165(16) 0.0167(18) 0.0236(19) 0.0054(14) -0.0002(14) -0.0060(13) 
C55 0.0109(14) 0.0215(18) 0.0193(17) 0.0012(14) 0.0023(12) -0.0014(13) 
C56 0.0128(15) 0.0175(17) 0.0191(17) -0.0001(13) 0.0022(12) -0.0003(13) 
C61 0.0138(14) 0.0123(15) 0.0125(14) -0.0006(12) 0.0018(11) -0.0006(12) 
C62 0.0147(15) 0.0176(17) 0.0131(15) -0.0027(13) 0.0000(12) 0.0028(13) 
C63 0.0179(17) 0.029(2) 0.0137(16) -0.0011(15) 0.0021(13) 0.0024(15) 
C64 0.0252(19) 0.024(2) 0.0173(17) -0.0067(15) 0.0061(15) -0.0022(16) 
C65 0.0260(19) 0.0176(18) 0.0168(17) -0.0014(14) 0.0086(14) 0.0022(14) 
C66 0.0184(16) 0.0136(16) 0.0149(15) -0.0030(12) 0.0029(13) 0.0019(13) 
C101 0.0133(16) 0.028(2) 0.026(2) 0.0028(16) 0.0028(14) 0.0047(15) 
C102 0.0214(18) 0.033(2) 0.0125(16) 0.0003(15) -0.0030(14) -0.0021(16) 
C201 0.0143(15) 0.0148(16) 0.0188(16) -0.0043(13) 0.0021(12) -0.0027(13) 
C202 0.0096(14) 0.0173(17) 0.0169(16) 0.0015(13) 0.0020(12) -0.0023(12) 
C301 0.0219(19) 0.045(3) 0.0156(18) -0.0040(17) 0.0021(15) 0.0005(18) 
C302 0.0104(15) 0.031(2) 0.0238(19) 0.0040(16) 0.0011(13) 0.0029(14) 
C401 0.0132(15) 0.024(2) 0.0206(18) 0.0022(15) -0.0001(13) -0.0011(14) 
C402 0.0193(17) 0.0169(18) 0.0221(18) -0.0066(14) -0.0015(14) -0.0001(14) 
N1 0.0124(13) 0.0165(15) 0.0130(13) 0.0016(11) -0.0006(10) 0.0003(11) 
N1S 0.038(3) 0.110(6) 0.050(3) 0.035(3) -0.003(2) 0.002(3) 
N2 0.0106(12) 0.0091(12) 0.0123(12) -0.0018(10) 0.0016(10) -0.0026(10) 
N2S 0.037(3) 0.056(3) 0.066(4) -0.021(3) 0.014(2) -0.002(2) 
N3 0.0125(13) 0.0228(17) 0.0165(14) 0.0005(12) 0.0004(11) 0.0023(12) 
N4 0.0117(12) 0.0110(13) 0.0171(14) -0.0024(11) 0.0010(10) -0.0010(10) 
F1 0.0366(17) 0.056(2) 0.057(2) -0.0085(17) 0.0192(16) -0.0165(16) 
F2 0.085(3) 0.0182(14) 0.0459(19) 0.0079(13) 0.0249(18) 0.0108(15) 
F3 0.050(2) 0.071(3) 0.0331(17) -0.0246(16) -0.0233(15) 0.0320(18) 
F4 0.0320(14) 0.0291(14) 0.0240(13) -0.0069(11) 0.0015(11) 0.0082(11) 
F5 0.0464(18) 0.056(2) 0.0227(14) -0.0073(13) -0.0081(13) 0.0273(16) 
F6 0.0468(18) 0.0363(17) 0.0354(16) -0.0090(13) 0.0103(14) 0.0128(14) 
F7 0.0288(15) 0.0464(19) 0.0420(18) -0.0063(14) 0.0056(13) -0.0177(13) 
F8 0.0470(18) 0.0478(19) 0.0220(13) -0.0022(12) 0.0041(12) -0.0245(15) 
F9 0.186(6) 0.030(2) 0.059(3) 0.0157(18) 0.059(3) 0.044(3) 
F10 0.053(2) 0.118(4) 0.086(3) -0.055(3) 0.039(2) -0.037(3) 
F11 0.092(3) 0.109(4) 0.0362(19) -0.034(2) -0.031(2) 0.073(3) 
F12 0.0309(13) 0.0233(13) 0.0242(12) -0.0043(10) 0.0020(10) 0.0019(10) 
F13 0.093(3) 0.0350(19) 0.064(2) -0.0081(17) 0.051(2) -0.0200(19) 
F14 0.048(2) 0.087(3) 0.051(2) -0.031(2) -0.0007(18) -0.011(2) 
F15 0.058(2) 0.050(2) 0.0261(15) 0.0036(14) 0.0101(14) -0.0220(17) 
F16 0.062(2) 0.050(2) 0.0245(15) -0.0027(14) -0.0014(14) -0.0251(17) 
B1 0.0201(19) 0.016(2) 0.0185(19) 0.0009(15) -0.0013(15) 0.0019(15) 
B2 0.021(2) 0.026(2) 0.0166(19) -0.0011(16) -0.0007(16) 0.0000(17) 
B3 0.021(2) 0.018(2) 0.020(2) 0.0026(16) -0.0016(16) 0.0024(16) 
B4 0.048(3) 0.035(3) 0.025(3) -0.004(2) 0.012(2) -0.015(3) 
  
_geom_special_details 
; 
 All esds (except the esd in the dihedral angle between two l.s. planes) 
 are estimated using the full covariance matrix.  The cell esds are taken 
 into account individually in the estimation of esds in distances, angles 
 and torsion angles; correlations between esds in cell parameters are only 
 used when they are defined by crystal symmetry.  An approximate (isotropic) 
 treatment of cell esds is used for estimating esds involving l.s. planes. 
; 
  
loop_ 
 _geom_bond_atom_site_label_1 
 _geom_bond_atom_site_label_2 
 _geom_bond_distance 
 _geom_bond_site_symmetry_2 
 _geom_bond_publ_flag 
Re1 C1 1.997(4) . ? 
Re1 C3 2.007(4) . ? 
Re1 C2 2.014(4) . ? 
Re1 C4 2.022(4) . ? 
Re1 C5 2.028(4) . ? 
Re1 P1 2.5082(9) . ? 
Re2 C9 2.006(4) . ? 
Re2 C6 2.012(4) . ? 
Re2 C8 2.014(4) . ? 
Re2 C7 2.023(4) . ? 
Re2 C10 2.025(4) . ? 
Re2 P2 2.5076(9) . ? 
P1 C11 1.826(3) . ? 
P1 C21 1.836(3) . ? 
P1 C31 1.860(4) . ? 
P2 C51 1.829(4) . ? 
P2 C61 1.837(4) . ? 
P2 C41 1.854(4) . ? 
O1 C1 1.122(5) . ? 
O2 C2 1.129(5) . ? 
O3 C3 1.134(5) . ? 
O4 C4 1.128(5) . ? 
O5 C5 1.121(5) . ? 
O6 C6 1.136(5) . ? 
O7 C7 1.128(5) . ? 
O8 C8 1.134(5) . ? 
O9 C9 1.118(5) . ? 
O10 C10 1.125(5) . ? 
C1S C2S 1.429(8) . ? 
C2S N1S 1.137(7) . ? 
C3S C4S 1.440(8) . ? 
C4S N2S 1.133(7) . ? 
C11 C12 1.392(5) . ? 
C11 C16 1.412(5) . ? 
C12 C13 1.390(5) . ? 
C13 C14 1.383(6) . ? 
C14 C15 1.395(6) . ? 
C15 C16 1.388(5) . ? 
C21 C22 1.394(5) . ? 
C21 C26 1.399(5) . ? 
C22 C23 1.390(5) . ? 
C23 C24 1.394(6) . ? 
C24 C25 1.381(6) . ? 
C25 C26 1.403(5) . ? 
C31 C36 1.388(5) . ? 
C31 C32 1.440(5) . ? 
C32 C33 1.356(5) . ? 
C33 C34 1.416(5) . ? 
C34 C37 1.418(5) . ? 
C34 C35 1.435(5) . ? 
C35 C40 1.435(5) . ? 
C35 C36 1.443(5) . ? 
C36 N2 1.453(4) . ? 
C37 C38 1.363(6) . ? 
C38 C39 1.405(6) . ? 
C39 C40 1.371(5) . ? 
C40 N1 1.483(5) . ? 
C41 C46 1.389(5) . ? 
C41 C42 1.434(5) . ? 
C42 C43 1.361(5) . ? 
C43 C44 1.413(5) . ? 
C44 C47 1.422(5) . ? 
C44 C45 1.425(5) . ? 
C45 C50 1.440(5) . ? 
C45 C46 1.456(5) . ? 
C46 N4 1.447(5) . ? 
C47 C48 1.360(6) . ? 
C48 C49 1.400(6) . ? 
C49 C50 1.372(5) . ? 
C50 N3 1.465(5) . ? 
C51 C52 1.398(5) . ? 
C51 C56 1.414(5) . ? 
C52 C53 1.394(5) . ? 
C53 C54 1.383(6) . ? 
C54 C55 1.390(6) . ? 
C55 C56 1.384(5) . ? 
C61 C62 1.394(5) . ? 
C61 C66 1.399(5) . ? 
C62 C63 1.392(5) . ? 
C63 C64 1.396(6) . ? 
C64 C65 1.385(6) . ? 
C65 C66 1.386(5) . ? 
C101 N1 1.496(5) . ? 
C102 N1 1.498(5) . ? 
C201 N2 1.470(5) . ? 
C202 N2 1.480(4) . ? 
C301 N3 1.497(5) . ? 
C302 N3 1.502(5) . ? 
C401 N4 1.472(5) . ? 
C402 N4 1.462(5) . ? 
F1 B1 1.386(6) . ? 
F2 B1 1.364(5) . ? 
F3 B1 1.375(5) . ? 
F4 B1 1.392(5) . ? 
F5 B2 1.391(6) . ? 
F6 B2 1.374(6) . ? 
F7 B2 1.384(6) . ? 
F8 B2 1.403(6) . ? 
F9 B3 1.335(6) . ? 
F10 B3 1.372(6) . ? 
F11 B3 1.351(6) . ? 
F12 B3 1.399(5) . ? 
F13 B4 1.376(7) . ? 
F14 B4 1.404(8) . ? 
F15 B4 1.388(6) . ? 
F16 B4 1.386(6) . ? 
  
loop_ 
 _geom_angle_atom_site_label_1 
 _geom_angle_atom_site_label_2 
 _geom_angle_atom_site_label_3 
 _geom_angle 
 _geom_angle_site_symmetry_1 
 _geom_angle_site_symmetry_3 
 _geom_angle_publ_flag 
C1 Re1 C3 86.11(15) . . ? 
C1 Re1 C2 89.17(15) . . ? 
C3 Re1 C2 88.04(15) . . ? 
C1 Re1 C4 87.42(15) . . ? 
C3 Re1 C4 91.81(15) . . ? 
C2 Re1 C4 176.59(14) . . ? 
C1 Re1 C5 91.51(16) . . ? 
C3 Re1 C5 175.99(15) . . ? 
C2 Re1 C5 88.70(15) . . ? 
C4 Re1 C5 91.30(16) . . ? 
C1 Re1 P1 177.05(11) . . ? 
C3 Re1 P1 94.77(10) . . ? 
C2 Re1 P1 93.68(10) . . ? 
C4 Re1 P1 89.73(10) . . ? 
C5 Re1 P1 87.76(11) . . ? 
C9 Re2 C6 86.08(16) . . ? 
C9 Re2 C8 90.37(15) . . ? 
C6 Re2 C8 87.80(15) . . ? 
C9 Re2 C7 88.20(15) . . ? 
C6 Re2 C7 92.85(15) . . ? 
C8 Re2 C7 178.39(14) . . ? 
C9 Re2 C10 89.86(17) . . ? 
C6 Re2 C10 173.66(15) . . ? 
C8 Re2 C10 87.34(15) . . ? 
C7 Re2 C10 91.90(16) . . ? 
C9 Re2 P2 175.65(11) . . ? 
C6 Re2 P2 93.59(10) . . ? 
C8 Re2 P2 93.95(11) . . ? 
C7 Re2 P2 87.48(10) . . ? 
C10 Re2 P2 90.81(12) . . ? 
C11 P1 C21 98.78(16) . . ? 
C11 P1 C31 115.39(15) . . ? 
C21 P1 C31 101.85(16) . . ? 
C11 P1 Re1 115.29(12) . . ? 
C21 P1 Re1 113.12(11) . . ? 
C31 P1 Re1 111.00(11) . . ? 
C51 P2 C61 99.04(17) . . ? 
C51 P2 C41 114.17(16) . . ? 
C61 P2 C41 103.13(16) . . ? 
C51 P2 Re2 115.53(12) . . ? 
C61 P2 Re2 112.04(12) . . ? 
C41 P2 Re2 111.54(12) . . ? 
O1 C1 Re1 178.0(4) . . ? 
O2 C2 Re1 177.6(3) . . ? 
N1S C2S C1S 176.6(8) . . ? 
O3 C3 Re1 176.0(3) . . ? 
O4 C4 Re1 179.0(3) . . ? 
N2S C4S C3S 178.2(7) . . ? 
O5 C5 Re1 178.5(4) . . ? 
O6 C6 Re2 175.2(4) . . ? 
O7 C7 Re2 178.9(4) . . ? 
O8 C8 Re2 178.0(3) . . ? 
O9 C9 Re2 177.4(4) . . ? 
O10 C10 Re2 177.4(4) . . ? 
C12 C11 C16 119.0(3) . . ? 
C12 C11 P1 121.6(3) . . ? 
C16 C11 P1 119.2(3) . . ? 
C13 C12 C11 120.2(3) . . ? 
C14 C13 C12 120.6(4) . . ? 
C13 C14 C15 120.0(3) . . ? 
C16 C15 C14 119.8(4) . . ? 
C15 C16 C11 120.3(3) . . ? 
C22 C21 C26 119.0(3) . . ? 
C22 C21 P1 117.4(3) . . ? 
C26 C21 P1 123.3(3) . . ? 
C23 C22 C21 120.8(3) . . ? 
C22 C23 C24 119.8(4) . . ? 
C25 C24 C23 120.2(4) . . ? 
C24 C25 C26 120.1(4) . . ? 
C21 C26 C25 120.1(3) . . ? 
C36 C31 C32 119.2(3) . . ? 
C36 C31 P1 133.1(3) . . ? 
C32 C31 P1 107.6(2) . . ? 
C33 C32 C31 121.6(3) . . ? 
C32 C33 C34 120.8(3) . . ? 
C33 C34 C37 119.4(3) . . ? 
C33 C34 C35 119.2(3) . . ? 
C37 C34 C35 121.4(3) . . ? 
C34 C35 C40 114.7(3) . . ? 
C34 C35 C36 119.1(3) . . ? 
C40 C35 C36 126.3(3) . . ? 
C31 C36 C35 120.0(3) . . ? 
C31 C36 N2 124.9(3) . . ? 
C35 C36 N2 115.1(3) . . ? 
C38 C37 C34 120.7(4) . . ? 
C37 C38 C39 119.8(4) . . ? 
C40 C39 C38 120.4(4) . . ? 
C39 C40 C35 123.0(3) . . ? 
C39 C40 N1 117.0(3) . . ? 
C35 C40 N1 120.0(3) . . ? 
C46 C41 C42 118.9(3) . . ? 
C46 C41 P2 132.3(3) . . ? 
C42 C41 P2 108.6(2) . . ? 
C43 C42 C41 121.9(3) . . ? 
C42 C43 C44 120.8(3) . . ? 
C43 C44 C47 119.4(3) . . ? 
C43 C44 C45 119.3(3) . . ? 
C47 C44 C45 121.2(3) . . ? 
C44 C45 C50 115.0(3) . . ? 
C44 C45 C46 119.1(3) . . ? 
C50 C45 C46 125.9(3) . . ? 
C41 C46 N4 125.4(3) . . ? 
C41 C46 C45 119.9(3) . . ? 
N4 C46 C45 114.7(3) . . ? 
C48 C47 C44 121.0(4) . . ? 
C47 C48 C49 119.5(4) . . ? 
C50 C49 C48 120.7(4) . . ? 
C49 C50 C45 122.5(4) . . ? 
C49 C50 N3 117.7(3) . . ? 
C45 C50 N3 119.7(3) . . ? 
C52 C51 C56 118.5(3) . . ? 
C52 C51 P2 121.9(3) . . ? 
C56 C51 P2 119.5(3) . . ? 
C53 C52 C51 120.2(4) . . ? 
C54 C53 C52 120.6(4) . . ? 
C53 C54 C55 119.9(3) . . ? 
C56 C55 C54 120.2(4) . . ? 
C55 C56 C51 120.5(4) . . ? 
C62 C61 C66 119.0(3) . . ? 
C62 C61 P2 117.0(3) . . ? 
C66 C61 P2 123.8(3) . . ? 
C63 C62 C61 121.1(4) . . ? 
C62 C63 C64 119.3(4) . . ? 
C65 C64 C63 119.6(4) . . ? 
C64 C65 C66 121.2(4) . . ? 
C65 C66 C61 119.6(4) . . ? 
C40 N1 C101 112.8(3) . . ? 
C40 N1 C102 112.5(3) . . ? 
C101 N1 C102 111.1(3) . . ? 
C36 N2 C201 114.8(3) . . ? 
C36 N2 C202 119.5(3) . . ? 
C201 N2 C202 113.8(3) . . ? 
C50 N3 C301 111.9(3) . . ? 
C50 N3 C302 113.1(3) . . ? 
C301 N3 C302 112.3(3) . . ? 
C46 N4 C402 115.5(3) . . ? 
C46 N4 C401 119.9(3) . . ? 
C402 N4 C401 114.3(3) . . ? 
F2 B1 F3 110.6(4) . . ? 
F2 B1 F1 108.7(4) . . ? 
F3 B1 F1 108.5(4) . . ? 
F2 B1 F4 110.2(4) . . ? 
F3 B1 F4 110.0(4) . . ? 
F1 B1 F4 108.9(4) . . ? 
F6 B2 F7 111.8(4) . . ? 
F6 B2 F5 109.7(4) . . ? 
F7 B2 F5 110.2(4) . . ? 
F6 B2 F8 110.0(4) . . ? 
F7 B2 F8 107.8(4) . . ? 
F5 B2 F8 107.2(4) . . ? 
F9 B3 F11 113.0(5) . . ? 
F9 B3 F10 108.9(5) . . ? 
F11 B3 F10 107.3(5) . . ? 
F9 B3 F12 109.0(4) . . ? 
F11 B3 F12 110.6(4) . . ? 
F10 B3 F12 107.8(4) . . ? 
F13 B4 F16 111.5(5) . . ? 
F13 B4 F15 110.4(5) . . ? 
F16 B4 F15 111.2(4) . . ? 
F13 B4 F14 106.9(5) . . ? 
F16 B4 F14 107.3(5) . . ? 
F15 B4 F14 109.5(5) . . ? 
  
loop_ 
 _geom_hbond_atom_site_label_D 
 _geom_hbond_atom_site_label_H 
 _geom_hbond_atom_site_label_A 
 _geom_hbond_distance_DH 
 _geom_hbond_distance_HA 
 _geom_hbond_distance_DA 
 _geom_hbond_angle_DHA 
 _geom_hbond_site_symmetry_A 
N1 H1N F1  0.95(5) 2.86(5) 3.259(5) 107(3) . 
N3 H2N F10  1.01(5) 2.87(5) 3.272(6) 105(3) . 
N1 H1N N2  0.95(5) 1.71(5) 2.608(4) 157(5) . 
N3 H2N N4  1.01(5) 1.65(5) 2.591(4) 154(5) . 
  
_diffrn_measured_fraction_theta_max    1.000 
_diffrn_reflns_theta_full              33.14 
_diffrn_measured_fraction_theta_full   1.000 
_refine_diff_density_max    4.414 
_refine_diff_density_min   -1.885 
_refine_diff_density_rms    0.180 

#===END
 
data_9 
  
_audit_creation_method            SHELXL-97 
_chemical_name_systematic 
; 
 ? 
; 
_chemical_name_common             ? 
_chemical_melting_point           ? 
_chemical_formula_moiety          ? 
_chemical_formula_sum 
 'C29 H26 B F7 N2 O8 P Re S' 
_chemical_formula_weight          923.56 
  
loop_ 
 _atom_type_symbol 
 _atom_type_description 
 _atom_type_scat_dispersion_real 
 _atom_type_scat_dispersion_imag 
 _atom_type_scat_source 
 'C'  'C'   0.0033   0.0016 
 'International Tables Vol C Tables 4.2.6.8 and 6.1.1.4' 
 'H'  'H'   0.0000   0.0000 
 'International Tables Vol C Tables 4.2.6.8 and 6.1.1.4' 
 'B'  'B'   0.0013   0.0007 
 'International Tables Vol C Tables 4.2.6.8 and 6.1.1.4' 
 'N'  'N'   0.0061   0.0033 
 'International Tables Vol C Tables 4.2.6.8 and 6.1.1.4' 
 'O'  'O'   0.0106   0.0060 
 'International Tables Vol C Tables 4.2.6.8 and 6.1.1.4' 
 'F'  'F'   0.0171   0.0103 
 'International Tables Vol C Tables 4.2.6.8 and 6.1.1.4' 
 'P'  'P'   0.1023   0.0942 
 'International Tables Vol C Tables 4.2.6.8 and 6.1.1.4' 
 'S'  'S'   0.1246   0.1234 
 'International Tables Vol C Tables 4.2.6.8 and 6.1.1.4' 
 'Re'  'Re'  -1.0185   7.2310 
 'International Tables Vol C Tables 4.2.6.8 and 6.1.1.4' 
  
_symmetry_cell_setting            Triclinic 
_symmetry_space_group_name_H-M    P-1 
  
loop_ 
 _symmetry_equiv_pos_as_xyz 
 'x, y, z' 
 '-x, -y, -z' 
  
_cell_length_a                    9.7279(4) 
_cell_length_b                    12.0858(5) 
_cell_length_c                    14.6112(6) 
_cell_angle_alpha                 77.393(2) 
_cell_angle_beta                  87.647(2) 
_cell_angle_gamma                 86.554(2) 
_cell_volume                      1672.70(12) 
_cell_formula_units_Z             2 
_cell_measurement_temperature     100(2) 
_cell_measurement_reflns_used     9385 
_cell_measurement_theta_min       2.65 
_cell_measurement_theta_max       48.48 
  
_exptl_crystal_description        plate 
_exptl_crystal_colour             colourless 
_exptl_crystal_size_max           0.46 
_exptl_crystal_size_mid           0.36 
_exptl_crystal_size_min           0.13 
_exptl_crystal_density_meas       ? 
_exptl_crystal_density_diffrn     1.834 
_exptl_crystal_density_method     'not measured' 
_exptl_crystal_F_000              904 
_exptl_absorpt_coefficient_mu     3.833 
_exptl_absorpt_correction_type    multi-scan 
_exptl_absorpt_correction_T_min   0.2716 
_exptl_absorpt_correction_T_max   0.6356 
_exptl_absorpt_process_details    sadabs 
  
_exptl_special_details 
; 
 ? 
; 
  
_diffrn_ambient_temperature       100(2) 
_diffrn_radiation_wavelength      0.71073 
_diffrn_radiation_type            MoK\a 
_diffrn_radiation_source          'fine-focus sealed tube' 
_diffrn_radiation_monochromator   graphite 
_diffrn_measurement_device_type   'Bruker APEX-II CCD' 
_diffrn_measurement_method        '\f and \w scans' 
_diffrn_detector_area_resol_mean  ? 
_diffrn_reflns_number             225122 
_diffrn_reflns_av_R_equivalents   0.0414 
_diffrn_reflns_av_sigmaI/netI     0.0307 
_diffrn_reflns_limit_h_min        -21 
_diffrn_reflns_limit_h_max        20 
_diffrn_reflns_limit_k_min        -26 
_diffrn_reflns_limit_k_max        26 
_diffrn_reflns_limit_l_min        -31 
_diffrn_reflns_limit_l_max        28 
_diffrn_reflns_theta_min          1.99 
_diffrn_reflns_theta_max          51.59 
_reflns_number_total              36998 
_reflns_number_gt                 31755 
_reflns_threshold_expression      >2sigma(I) 
  
_computing_data_collection        'Bruker APEX2' 
_computing_cell_refinement        'Bruker SAINT' 
_computing_data_reduction         'Bruker SAINT' 
_computing_structure_solution     'SHELXS-97 (Sheldrick, 2008)' 
_computing_structure_refinement   'SHELXL-97 (Sheldrick, 2008)' 
_computing_molecular_graphics     'Bruker SHELXTL' 
_computing_publication_material   'Bruker SHELXTL' 
  
_refine_special_details 
; 
 Refinement of F^2^ against ALL reflections.  The weighted R-factor wR and 
 goodness of fit S are based on F^2^, conventional R-factors R are based 
 on F, with F set to zero for negative F^2^. The threshold expression of 
 F^2^ > 2sigma(F^2^) is used only for calculating R-factors(gt) etc. and is 
 not relevant to the choice of reflections for refinement.  R-factors based 
 on F^2^ are statistically about twice as large as those based on F, and R- 
 factors based on ALL data will be even larger. 
; 
  
_refine_ls_structure_factor_coef  Fsqd 
_refine_ls_matrix_type            full 
_refine_ls_weighting_scheme       calc 
_refine_ls_weighting_details 
 'calc w=1/[\s^2^(Fo^2^)+(0.0372P)^2^+1.4151P] where P=(Fo^2^+2Fc^2^)/3' 
_atom_sites_solution_primary      direct 
_atom_sites_solution_secondary    difmap 
_atom_sites_solution_hydrogens    geom 
_refine_ls_hydrogen_treatment     mixed 
_refine_ls_extinction_method      none 
_refine_ls_extinction_coef        ? 
_refine_ls_number_reflns          36998 
_refine_ls_number_parameters      457 
_refine_ls_number_restraints      1 
_refine_ls_R_factor_all           0.0445 
_refine_ls_R_factor_gt            0.0323 
_refine_ls_wR_factor_ref          0.0810 
_refine_ls_wR_factor_gt           0.0755 
_refine_ls_goodness_of_fit_ref    1.070 
_refine_ls_restrained_S_all       1.070 
_refine_ls_shift/su_max           0.005 
_refine_ls_shift/su_mean          0.000 
  
loop_ 
 _atom_site_label 
 _atom_site_type_symbol 
 _atom_site_fract_x 
 _atom_site_fract_y 
 _atom_site_fract_z 
 _atom_site_U_iso_or_equiv 
 _atom_site_adp_type 
 _atom_site_occupancy 
 _atom_site_symmetry_multiplicity 
 _atom_site_calc_flag 
 _atom_site_refinement_flags 
 _atom_site_disorder_assembly 
 _atom_site_disorder_group 
S1 S 0.68753(3) 0.68697(3) 0.35444(2) 0.01551(5) Uani 1 1 d . . . 
B1 B 0.7843(3) 1.16836(17) 0.87029(17) 0.0308(4) Uani 1 1 d . . . 
P1 P 0.61760(3) 0.72125(3) 0.77020(2) 0.01052(4) Uani 1 1 d . . . 
Re1 Re 0.691726(4) 0.553609(3) 0.702459(3) 0.01039(1) Uani 1 1 d . . . 
O1 O 0.75602(13) 0.33508(10) 0.62360(10) 0.0224(2) Uani 1 1 d . . . 
O8 O 0.7161(2) 0.76526(14) 0.26578(13) 0.0387(4) Uani 1 1 d . . . 
O2 O 0.93386(12) 0.66778(11) 0.57428(10) 0.0241(2) Uani 1 1 d . . . 
O7 O 0.70856(15) 0.73461(16) 0.43342(12) 0.0337(3) Uani 1 1 d . . . 
O3 O 0.48233(14) 0.41677(11) 0.84779(9) 0.0224(2) Uani 1 1 d . . . 
O4 O 0.46164(12) 0.62483(12) 0.55203(9) 0.0227(2) Uani 1 1 d . . . 
O6 O 0.56437(14) 0.62790(15) 0.35529(12) 0.0311(3) Uani 1 1 d . . . 
O5 O 0.92781(12) 0.48696(10) 0.84731(9) 0.02143(19) Uani 1 1 d . . . 
N1 N 0.38230(15) 1.03057(11) 0.82542(10) 0.0206(2) Uani 1 1 d D . . 
H1N H 0.396(3) 1.082(2) 0.7827(16) 0.025 Uiso 1 1 d D . . 
C1S C 0.9861(2) 1.11770(18) 0.60876(17) 0.0324(4) Uani 1 1 d . . . 
H1S1 H 1.0740 1.1542 0.6050 0.049 Uiso 1 1 calc R . . 
H1S2 H 0.9304 1.1345 0.6620 0.049 Uiso 1 1 calc R . . 
H1S3 H 0.9366 1.1467 0.5506 0.049 Uiso 1 1 calc R . . 
C1 C 0.73458(13) 0.41364(11) 0.65320(10) 0.01538(17) Uani 1 1 d . . . 
C6 C 0.82534(19) 0.57826(15) 0.35741(15) 0.0261(3) Uani 1 1 d . . . 
N1S N 1.0336(4) 0.9009(2) 0.6315(2) 0.0548(7) Uani 1 1 d . . . 
C2 C 0.84121(13) 0.63186(11) 0.61721(10) 0.01545(17) Uani 1 1 d . . . 
C2S C 1.0118(2) 0.99603(18) 0.62165(15) 0.0311(4) Uani 1 1 d . . . 
C3 C 0.55496(13) 0.46619(11) 0.79375(9) 0.01452(16) Uani 1 1 d . . . 
C4 C 0.54555(13) 0.59943(11) 0.60506(9) 0.01467(16) Uani 1 1 d . . . 
C5 C 0.84034(12) 0.50894(10) 0.79668(9) 0.01419(16) Uani 1 1 d . . . 
C11 C 0.44119(13) 0.70414(10) 0.81795(10) 0.01492(17) Uani 1 1 d . . . 
C12 C 0.33853(14) 0.70758(14) 0.75334(13) 0.0205(2) Uani 1 1 d . . . 
H12 H 0.3617 0.7232 0.6882 0.025 Uiso 1 1 calc R . . 
C13 C 0.20318(16) 0.68846(16) 0.78298(17) 0.0279(3) Uani 1 1 d . . . 
H13 H 0.1342 0.6910 0.7383 0.033 Uiso 1 1 calc R . . 
C14 C 0.16865(17) 0.66562(15) 0.87824(18) 0.0302(4) Uani 1 1 d . . . 
H14 H 0.0766 0.6499 0.8988 0.036 Uiso 1 1 calc R . . 
C15 C 0.26836(19) 0.66572(14) 0.94318(15) 0.0271(3) Uani 1 1 d . . . 
H15 H 0.2438 0.6529 1.0081 0.032 Uiso 1 1 calc R . . 
C16 C 0.40508(16) 0.68462(12) 0.91343(11) 0.0196(2) Uani 1 1 d . . . 
H16 H 0.4734 0.6842 0.9582 0.024 Uiso 1 1 calc R . . 
C20 C 0.51926(14) 0.96658(11) 0.82225(10) 0.01669(18) Uani 1 1 d . . . 
H20A H 0.5115 0.8879 0.8590 0.020 Uiso 1 1 calc R . . 
H20B H 0.5884 1.0029 0.8522 0.020 Uiso 1 1 calc R . . 
C21 C 0.61085(12) 0.86242(9) 0.69278(8) 0.01256(15) Uani 1 1 d . . . 
C22 C 0.65610(14) 0.87056(11) 0.59949(9) 0.01510(17) Uani 1 1 d . . . 
H22 H 0.6819 0.8032 0.5781 0.018 Uiso 1 1 calc R . . 
C23 C 0.66408(16) 0.97531(13) 0.53749(10) 0.0193(2) Uani 1 1 d . . . 
H23 H 0.6937 0.9793 0.4741 0.023 Uiso 1 1 calc R . . 
C24 C 0.62845(17) 1.07397(12) 0.56882(12) 0.0212(2) Uani 1 1 d . . . 
H24 H 0.6360 1.1460 0.5274 0.025 Uiso 1 1 calc R . . 
C25 C 0.58156(16) 1.06706(11) 0.66114(11) 0.0189(2) Uani 1 1 d . . . 
H25 H 0.5575 1.1350 0.6821 0.023 Uiso 1 1 calc R . . 
C26 C 0.56915(13) 0.96288(10) 0.72349(9) 0.01461(16) Uani 1 1 d . . . 
C31 C 0.72389(12) 0.73227(10) 0.86701(8) 0.01247(14) Uani 1 1 d . . . 
C32 C 0.72812(15) 0.64340(11) 0.94696(9) 0.01670(18) Uani 1 1 d . . . 
H32 H 0.6749 0.5792 0.9501 0.020 Uiso 1 1 calc R . . 
C33 C 0.80974(16) 0.64871(13) 1.02157(10) 0.0189(2) Uani 1 1 d . . . 
H33 H 0.8104 0.5891 1.0760 0.023 Uiso 1 1 calc R . . 
C34 C 0.89026(15) 0.74076(13) 1.01682(10) 0.0183(2) Uani 1 1 d . . . 
H34 H 0.9459 0.7442 1.0679 0.022 Uiso 1 1 calc R . . 
C35 C 0.88935(13) 0.82807(12) 0.93689(10) 0.01644(18) Uani 1 1 d . . . 
H35 H 0.9453 0.8907 0.9334 0.020 Uiso 1 1 calc R . . 
C36 C 0.80693(12) 0.82410(10) 0.86195(9) 0.01377(16) Uani 1 1 d . . . 
H36 H 0.8072 0.8837 0.8075 0.017 Uiso 1 1 calc R . . 
C101 C 0.3524(3) 1.0561(2) 0.92002(15) 0.0345(4) Uani 1 1 d . . . 
H10A H 0.2613 1.0953 0.9208 0.052 Uiso 1 1 calc R . . 
H10B H 0.4225 1.1046 0.9337 0.052 Uiso 1 1 calc R . . 
H10C H 0.3537 0.9850 0.9676 0.052 Uiso 1 1 calc R . . 
C102 C 0.26641(19) 0.97174(18) 0.79680(19) 0.0325(4) Uani 1 1 d . . . 
H10D H 0.2504 0.9023 0.8441 0.049 Uiso 1 1 calc R . . 
H10E H 0.2896 0.9522 0.7362 0.049 Uiso 1 1 calc R . . 
H10F H 0.1829 1.0220 0.7913 0.049 Uiso 1 1 calc R . . 
F1 F 0.6447(2) 1.17749(18) 0.8929(2) 0.0631(6) Uani 1 1 d . . . 
F2 F 0.8314(2) 1.27520(12) 0.83625(13) 0.0543(5) Uani 1 1 d . . . 
F3 F 0.8083(2) 1.09888(14) 0.80691(12) 0.0438(4) Uani 1 1 d . . . 
F4 F 0.8531(2) 1.11871(14) 0.95170(11) 0.0444(4) Uani 1 1 d . . . 
F5 F 0.8150(2) 0.49971(15) 0.43732(15) 0.0557(5) Uani 1 1 d . . . 
F6 F 0.8215(2) 0.52818(16) 0.28565(15) 0.0520(5) Uani 1 1 d . . . 
F7 F 0.94870(13) 0.61855(15) 0.35529(14) 0.0429(4) Uani 1 1 d . . . 
  
loop_ 
 _atom_site_aniso_label 
 _atom_site_aniso_U_11 
 _atom_site_aniso_U_22 
 _atom_site_aniso_U_33 
 _atom_site_aniso_U_23 
 _atom_site_aniso_U_13 
 _atom_site_aniso_U_12 
S1 0.01402(10) 0.01389(11) 0.01892(12) -0.00458(9) 0.00060(9) -0.00012(8) 
B1 0.0460(12) 0.0153(6) 0.0326(9) -0.0040(6) -0.0149(9) -0.0081(7) 
P1 0.01043(9) 0.00892(9) 0.01291(10) -0.00387(8) -0.00120(8) 0.00015(7) 
Re1 0.00947(1) 0.00881(1) 0.01374(2) -0.00427(1) -0.00095(1) -0.00025(1) 
O1 0.0235(5) 0.0168(4) 0.0306(5) -0.0142(4) -0.0011(4) 0.0015(3) 
O8 0.0412(8) 0.0285(7) 0.0355(8) 0.0109(6) 0.0120(6) 0.0101(6) 
O2 0.0157(4) 0.0236(5) 0.0311(6) -0.0019(4) 0.0043(4) -0.0047(3) 
O7 0.0220(5) 0.0493(9) 0.0404(8) -0.0329(7) -0.0002(5) -0.0031(5) 
O3 0.0239(5) 0.0206(4) 0.0217(5) -0.0022(4) 0.0055(4) -0.0068(4) 
O4 0.0166(4) 0.0318(6) 0.0194(4) -0.0035(4) -0.0066(3) -0.0023(4) 
O6 0.0189(5) 0.0416(8) 0.0385(7) -0.0190(6) -0.0008(5) -0.0083(5) 
O5 0.0178(4) 0.0196(4) 0.0275(5) -0.0055(4) -0.0103(4) 0.0017(3) 
N1 0.0236(5) 0.0146(4) 0.0243(5) -0.0072(4) 0.0010(4) 0.0043(4) 
C1S 0.0352(9) 0.0253(7) 0.0365(10) -0.0050(7) -0.0015(7) -0.0059(7) 
C1 0.0140(4) 0.0128(4) 0.0211(5) -0.0078(3) -0.0003(3) -0.0005(3) 
C6 0.0226(6) 0.0196(6) 0.0350(8) -0.0053(5) 0.0010(6) 0.0029(5) 
N1S 0.085(2) 0.0299(9) 0.0511(14) -0.0080(9) -0.0283(14) 0.0012(11) 
C2 0.0132(4) 0.0141(4) 0.0191(5) -0.0036(3) 0.0004(3) -0.0019(3) 
C2S 0.0367(9) 0.0271(8) 0.0292(8) -0.0028(6) -0.0087(7) -0.0062(7) 
C3 0.0149(4) 0.0130(4) 0.0163(4) -0.0041(3) -0.0002(3) -0.0022(3) 
C4 0.0127(4) 0.0168(4) 0.0152(4) -0.0045(3) -0.0019(3) -0.0017(3) 
C5 0.0128(4) 0.0114(4) 0.0189(4) -0.0041(3) -0.0034(3) 0.0002(3) 
C11 0.0125(4) 0.0126(4) 0.0210(5) -0.0071(3) 0.0017(3) -0.0006(3) 
C12 0.0123(4) 0.0230(6) 0.0301(7) -0.0143(5) -0.0026(4) 0.0021(4) 
C13 0.0124(4) 0.0260(7) 0.0514(11) -0.0222(7) -0.0002(5) 0.0001(4) 
C14 0.0161(5) 0.0216(6) 0.0570(12) -0.0195(7) 0.0127(6) -0.0044(4) 
C15 0.0250(6) 0.0188(5) 0.0380(9) -0.0096(6) 0.0161(6) -0.0040(5) 
C16 0.0202(5) 0.0154(4) 0.0232(6) -0.0055(4) 0.0069(4) -0.0016(4) 
C20 0.0178(4) 0.0132(4) 0.0209(5) -0.0083(4) -0.0021(4) 0.0017(3) 
C21 0.0141(4) 0.0097(3) 0.0143(4) -0.0030(3) -0.0030(3) 0.0002(3) 
C22 0.0171(4) 0.0135(4) 0.0145(4) -0.0022(3) -0.0025(3) -0.0003(3) 
C23 0.0217(5) 0.0175(5) 0.0166(5) 0.0016(4) -0.0030(4) -0.0017(4) 
C24 0.0242(6) 0.0139(4) 0.0231(6) 0.0022(4) -0.0049(5) -0.0020(4) 
C25 0.0213(5) 0.0111(4) 0.0242(6) -0.0029(4) -0.0045(4) -0.0002(3) 
C26 0.0157(4) 0.0101(3) 0.0189(5) -0.0047(3) -0.0043(3) 0.0006(3) 
C31 0.0132(4) 0.0114(3) 0.0134(4) -0.0038(3) -0.0017(3) 0.0002(3) 
C32 0.0202(5) 0.0145(4) 0.0149(4) -0.0016(3) -0.0027(4) -0.0007(3) 
C33 0.0219(5) 0.0199(5) 0.0140(4) -0.0022(4) -0.0038(4) 0.0025(4) 
C34 0.0168(4) 0.0223(5) 0.0172(5) -0.0077(4) -0.0047(4) 0.0035(4) 
C35 0.0128(4) 0.0186(5) 0.0197(5) -0.0077(4) -0.0041(3) 0.0005(3) 
C36 0.0126(4) 0.0131(4) 0.0161(4) -0.0043(3) -0.0022(3) -0.0003(3) 
C101 0.0424(11) 0.0360(10) 0.0259(8) -0.0128(7) 0.0060(7) 0.0101(8) 
C102 0.0189(6) 0.0286(8) 0.0536(12) -0.0179(8) -0.0052(7) 0.0047(5) 
F1 0.0427(9) 0.0460(10) 0.1101(19) -0.0377(11) -0.0174(11) 0.0094(8) 
F2 0.0886(14) 0.0192(5) 0.0533(9) 0.0083(5) -0.0368(9) -0.0232(7) 
F3 0.0641(11) 0.0338(7) 0.0385(7) -0.0149(6) 0.0022(7) -0.0200(7) 
F4 0.0575(10) 0.0347(7) 0.0380(7) 0.0056(6) -0.0225(7) -0.0144(7) 
F5 0.0500(10) 0.0380(8) 0.0623(11) 0.0195(8) 0.0047(8) 0.0171(7) 
F6 0.0534(10) 0.0490(9) 0.0655(11) -0.0427(9) 0.0011(8) 0.0120(8) 
F7 0.0150(4) 0.0430(8) 0.0712(11) -0.0153(8) 0.0024(5) 0.0019(5) 
  
_geom_special_details 
; 
 All esds (except the esd in the dihedral angle between two l.s. planes) 
 are estimated using the full covariance matrix.  The cell esds are taken 
 into account individually in the estimation of esds in distances, angles 
 and torsion angles; correlations between esds in cell parameters are only 
 used when they are defined by crystal symmetry.  An approximate (isotropic) 
 treatment of cell esds is used for estimating esds involving l.s. planes. 
; 
  
loop_ 
 _geom_bond_atom_site_label_1 
 _geom_bond_atom_site_label_2 
 _geom_bond_distance 
 _geom_bond_site_symmetry_2 
 _geom_bond_publ_flag 
S1 O7 1.4244(14) . ? 
S1 O6 1.4294(14) . ? 
S1 O8 1.4552(15) . ? 
S1 C6 1.8148(17) . ? 
B1 F2 1.377(2) . ? 
B1 F3 1.384(3) . ? 
B1 F1 1.388(4) . ? 
B1 F4 1.388(3) . ? 
P1 C31 1.8184(12) . ? 
P1 C21 1.8289(12) . ? 
P1 C11 1.8320(13) . ? 
P1 Re1 2.4992(3) . ? 
Re1 C1 1.9938(12) . ? 
Re1 C5 2.0054(12) . ? 
Re1 C2 2.0157(13) . ? 
Re1 C3 2.0183(13) . ? 
Re1 C4 2.0203(12) . ? 
O1 C1 1.1314(16) . ? 
O2 C2 1.1296(17) . ? 
O3 C3 1.1306(17) . ? 
O4 C4 1.1308(17) . ? 
O5 C5 1.1317(16) . ? 
N1 C102 1.489(3) . ? 
N1 C101 1.494(2) . ? 
N1 C20 1.5040(18) . ? 
C1S C2S 1.449(3) . ? 
C6 F7 1.319(2) . ? 
C6 F6 1.323(3) . ? 
C6 F5 1.339(3) . ? 
N1S C2S 1.135(3) . ? 
C11 C12 1.395(2) . ? 
C11 C16 1.397(2) . ? 
C12 C13 1.386(2) . ? 
C13 C14 1.390(3) . ? 
C14 C15 1.385(3) . ? 
C15 C16 1.398(2) . ? 
C20 C26 1.5126(19) . ? 
C21 C22 1.3996(18) . ? 
C21 C26 1.4155(16) . ? 
C22 C23 1.3909(19) . ? 
C23 C24 1.388(2) . ? 
C24 C25 1.393(2) . ? 
C25 C26 1.3923(19) . ? 
C31 C36 1.3989(17) . ? 
C31 C32 1.4039(18) . ? 
C32 C33 1.389(2) . ? 
C33 C34 1.387(2) . ? 
C34 C35 1.393(2) . ? 
C35 C36 1.3941(18) . ? 
  
loop_ 
 _geom_angle_atom_site_label_1 
 _geom_angle_atom_site_label_2 
 _geom_angle_atom_site_label_3 
 _geom_angle 
 _geom_angle_site_symmetry_1 
 _geom_angle_site_symmetry_3 
 _geom_angle_publ_flag 
O7 S1 O6 117.09(9) . . ? 
O7 S1 O8 112.53(12) . . ? 
O6 S1 O8 113.73(12) . . ? 
O7 S1 C6 104.87(10) . . ? 
O6 S1 C6 104.34(9) . . ? 
O8 S1 C6 102.29(9) . . ? 
F2 B1 F3 112.0(2) . . ? 
F2 B1 F1 109.3(2) . . ? 
F3 B1 F1 110.52(19) . . ? 
F2 B1 F4 108.79(17) . . ? 
F3 B1 F4 108.0(2) . . ? 
F1 B1 F4 108.1(2) . . ? 
C31 P1 C21 105.58(5) . . ? 
C31 P1 C11 106.67(6) . . ? 
C21 P1 C11 104.09(6) . . ? 
C31 P1 Re1 111.95(4) . . ? 
C21 P1 Re1 118.80(4) . . ? 
C11 P1 Re1 108.89(4) . . ? 
C1 Re1 C5 91.12(5) . . ? 
C1 Re1 C2 89.63(5) . . ? 
C5 Re1 C2 85.02(5) . . ? 
C1 Re1 C3 88.33(5) . . ? 
C5 Re1 C3 90.51(5) . . ? 
C2 Re1 C3 175.05(5) . . ? 
C1 Re1 C4 88.45(5) . . ? 
C5 Re1 C4 178.62(5) . . ? 
C2 Re1 C4 93.66(5) . . ? 
C3 Re1 C4 90.79(5) . . ? 
C1 Re1 P1 174.71(4) . . ? 
C5 Re1 P1 90.73(4) . . ? 
C2 Re1 P1 95.46(4) . . ? 
C3 Re1 P1 86.70(4) . . ? 
C4 Re1 P1 89.81(4) . . ? 
C102 N1 C101 110.50(17) . . ? 
C102 N1 C20 113.16(12) . . ? 
C101 N1 C20 111.19(14) . . ? 
O1 C1 Re1 178.12(13) . . ? 
F7 C6 F6 107.03(18) . . ? 
F7 C6 F5 106.52(19) . . ? 
F6 C6 F5 108.93(19) . . ? 
F7 C6 S1 112.77(13) . . ? 
F6 C6 S1 111.78(15) . . ? 
F5 C6 S1 109.61(14) . . ? 
O2 C2 Re1 173.15(13) . . ? 
N1S C2S C1S 179.1(3) . . ? 
O3 C3 Re1 177.07(13) . . ? 
O4 C4 Re1 178.53(12) . . ? 
O5 C5 Re1 176.98(13) . . ? 
C12 C11 C16 119.01(13) . . ? 
C12 C11 P1 116.54(11) . . ? 
C16 C11 P1 124.42(11) . . ? 
C13 C12 C11 120.88(17) . . ? 
C12 C13 C14 119.82(17) . . ? 
C15 C14 C13 120.06(15) . . ? 
C14 C15 C16 120.16(17) . . ? 
C11 C16 C15 120.00(16) . . ? 
N1 C20 C26 112.92(12) . . ? 
C22 C21 C26 119.04(11) . . ? 
C22 C21 P1 117.38(9) . . ? 
C26 C21 P1 123.51(10) . . ? 
C23 C22 C21 121.27(12) . . ? 
C24 C23 C22 119.55(14) . . ? 
C23 C24 C25 119.77(13) . . ? 
C26 C25 C24 121.50(13) . . ? 
C25 C26 C21 118.77(13) . . ? 
C25 C26 C20 116.52(11) . . ? 
C21 C26 C20 124.60(11) . . ? 
C36 C31 C32 119.12(11) . . ? 
C36 C31 P1 121.74(9) . . ? 
C32 C31 P1 119.06(9) . . ? 
C33 C32 C31 120.39(13) . . ? 
C34 C33 C32 120.24(13) . . ? 
C33 C34 C35 119.81(12) . . ? 
C34 C35 C36 120.43(13) . . ? 
C35 C36 C31 119.97(12) . . ? 
  
loop_ 
 _geom_hbond_atom_site_label_D 
 _geom_hbond_atom_site_label_H 
 _geom_hbond_atom_site_label_A 
 _geom_hbond_distance_DH 
 _geom_hbond_distance_HA 
 _geom_hbond_distance_DA 
 _geom_hbond_angle_DHA 
 _geom_hbond_site_symmetry_A 
N1 H1N O8  0.790(17) 2.09(3) 2.677(2) 131(3) 2_676 
  
_diffrn_measured_fraction_theta_max    0.986 
_diffrn_reflns_theta_full              51.59 
_diffrn_measured_fraction_theta_full   0.986 
_refine_diff_density_max    5.884 
_refine_diff_density_min   -2.353 
_refine_diff_density_rms    0.176 

#===END
 
data_11 
  
_audit_creation_method            SHELXL-97 
_chemical_name_systematic 
; 
 ? 
; 
_chemical_name_common             ? 
_chemical_melting_point           ? 
_chemical_formula_moiety          ? 
_chemical_formula_sum 
 'C29 H29 B2 Cl2 F8 N3 O5 P Re' 
_chemical_formula_weight          961.24 
  
loop_ 
 _atom_type_symbol 
 _atom_type_description 
 _atom_type_scat_dispersion_real 
 _atom_type_scat_dispersion_imag 
 _atom_type_scat_source 
 'C'  'C'   0.0033   0.0016 
 'International Tables Vol C Tables 4.2.6.8 and 6.1.1.4' 
 'H'  'H'   0.0000   0.0000 
 'International Tables Vol C Tables 4.2.6.8 and 6.1.1.4' 
 'B'  'B'   0.0013   0.0007 
 'International Tables Vol C Tables 4.2.6.8 and 6.1.1.4' 
 'N'  'N'   0.0061   0.0033 
 'International Tables Vol C Tables 4.2.6.8 and 6.1.1.4' 
 'O'  'O'   0.0106   0.0060 
 'International Tables Vol C Tables 4.2.6.8 and 6.1.1.4' 
 'F'  'F'   0.0171   0.0103 
 'International Tables Vol C Tables 4.2.6.8 and 6.1.1.4' 
 'P'  'P'   0.1023   0.0942 
 'International Tables Vol C Tables 4.2.6.8 and 6.1.1.4' 
 'Re'  'Re'  -1.0185   7.2310 
 'International Tables Vol C Tables 4.2.6.8 and 6.1.1.4' 
 'Cl'  'Cl'   0.1484   0.1585 
 'International Tables Vol C Tables 4.2.6.8 and 6.1.1.4' 
  
_symmetry_cell_setting            Monoclinic 
_symmetry_space_group_name_H-M    P2(1)/n 
  
loop_ 
 _symmetry_equiv_pos_as_xyz 
 'x, y, z' 
 '-x+1/2, y+1/2, -z+1/2' 
 '-x, -y, -z' 
 'x-1/2, -y-1/2, z-1/2' 
  
_cell_length_a                    14.3448(6) 
_cell_length_b                    13.5239(5) 
_cell_length_c                    18.9198(8) 
_cell_angle_alpha                 90.00 
_cell_angle_beta                  102.108(2) 
_cell_angle_gamma                 90.00 
_cell_volume                      3588.7(3) 
_cell_formula_units_Z             4 
_cell_measurement_temperature     100(2) 
_cell_measurement_reflns_used     9441 
_cell_measurement_theta_min       3.25 
_cell_measurement_theta_max       38.29 
  
_exptl_crystal_description        block 
_exptl_crystal_colour             colourless 
_exptl_crystal_size_max           0.39 
_exptl_crystal_size_mid           0.22 
_exptl_crystal_size_min           0.18 
_exptl_crystal_density_meas       ? 
_exptl_crystal_density_diffrn     1.779 
_exptl_crystal_density_method     'not measured' 
_exptl_crystal_F_000              1880 
_exptl_absorpt_coefficient_mu     3.663 
_exptl_absorpt_correction_type    multi-scan 
_exptl_absorpt_correction_T_min   0.3270 
_exptl_absorpt_correction_T_max   0.5585 
_exptl_absorpt_process_details    sadabs 
  
_exptl_special_details 
; 
 ? 
; 
  
_diffrn_ambient_temperature       100(2) 
_diffrn_radiation_wavelength      0.71073 
_diffrn_radiation_type            MoK\a 
_diffrn_radiation_source          'fine-focus sealed tube' 
_diffrn_radiation_monochromator   graphite 
_diffrn_measurement_device_type   'Bruker APEX-II CCD' 
_diffrn_measurement_method        '\f and \w scans' 
_diffrn_detector_area_resol_mean  ? 
_diffrn_reflns_number             249315 
_diffrn_reflns_av_R_equivalents   0.0556 
_diffrn_reflns_av_sigmaI/netI     0.0288 
_diffrn_reflns_limit_h_min        -27 
_diffrn_reflns_limit_h_max        25 
_diffrn_reflns_limit_k_min        -25 
_diffrn_reflns_limit_k_max        24 
_diffrn_reflns_limit_l_min        -25 
_diffrn_reflns_limit_l_max        35 
_diffrn_reflns_theta_min          1.63 
_diffrn_reflns_theta_max          42.13 
_reflns_number_total              25270 
_reflns_number_gt                 21268 
_reflns_threshold_expression      >2sigma(I) 
  
_computing_data_collection        'Bruker APEX2' 
_computing_cell_refinement        'Bruker SAINT' 
_computing_data_reduction         'Bruker SAINT' 
_computing_structure_solution     'SHELXS-97 (Sheldrick, 2008)' 
_computing_structure_refinement   'SHELXL-97 (Sheldrick, 2008)' 
_computing_molecular_graphics     'Bruker SHELXTL' 
_computing_publication_material   'Bruker SHELXTL' 
  
_refine_special_details 
; 
 Refinement of F^2^ against ALL reflections.  The weighted R-factor wR and 
 goodness of fit S are based on F^2^, conventional R-factors R are based 
 on F, with F set to zero for negative F^2^. The threshold expression of 
 F^2^ > 2sigma(F^2^) is used only for calculating R-factors(gt) etc. and is 
 not relevant to the choice of reflections for refinement.  R-factors based 
 on F^2^ are statistically about twice as large as those based on F, and R- 
 factors based on ALL data will be even larger. 
; 
  
_refine_ls_structure_factor_coef  Fsqd 
_refine_ls_matrix_type            full 
_refine_ls_weighting_scheme       calc 
_refine_ls_weighting_details 
 'calc w=1/[\s^2^(Fo^2^)+(0.0287P)^2^+0.6594P] where P=(Fo^2^+2Fc^2^)/3' 
_atom_sites_solution_primary      direct 
_atom_sites_solution_secondary    difmap 
_atom_sites_solution_hydrogens    geom 
_refine_ls_hydrogen_treatment     mixed 
_refine_ls_extinction_method      none 
_refine_ls_extinction_coef        ? 
_refine_ls_number_reflns          25270 
_refine_ls_number_parameters      467 
_refine_ls_number_restraints      1 
_refine_ls_R_factor_all           0.0339 
_refine_ls_R_factor_gt            0.0231 
_refine_ls_wR_factor_ref          0.0594 
_refine_ls_wR_factor_gt           0.0530 
_refine_ls_goodness_of_fit_ref    1.073 
_refine_ls_restrained_S_all       1.073 
_refine_ls_shift/su_max           0.006 
_refine_ls_shift/su_mean          0.000 
  
loop_ 
 _atom_site_label 
 _atom_site_type_symbol 
 _atom_site_fract_x 
 _atom_site_fract_y 
 _atom_site_fract_z 
 _atom_site_U_iso_or_equiv 
 _atom_site_adp_type 
 _atom_site_occupancy 
 _atom_site_symmetry_multiplicity 
 _atom_site_calc_flag 
 _atom_site_refinement_flags 
 _atom_site_disorder_assembly 
 _atom_site_disorder_group 
P1 P 0.45305(2) 0.79603(2) 0.307237(15) 0.00949(4) Uani 1 1 d . . . 
Re1 Re 0.441671(3) 0.760236(3) 0.434179(2) 0.00915(1) Uani 1 1 d . . . 
Cl1S Cl 0.99845(5) 0.94637(4) 0.26905(3) 0.04955(13) Uani 1 1 d . . . 
Cl2S Cl 0.84657(3) 0.83890(3) 0.31523(2) 0.03225(8) Uani 1 1 d . . . 
N1 N 0.48985(7) 0.78346(8) 0.14761(5) 0.01275(15) Uani 1 1 d D . . 
H1 H 0.4327(10) 0.7793(14) 0.1479(10) 0.015 Uiso 1 1 d D . . 
N2 N 0.45231(7) 0.78755(8) 0.02290(5) 0.01442(16) Uani 1 1 d . . . 
N3 N 0.58882(7) 0.86801(8) 0.08462(6) 0.01589(17) Uani 1 1 d . . . 
O1 O 0.48380(8) 0.53570(7) 0.40606(6) 0.0250(2) Uani 1 1 d . . . 
O2 O 0.42538(8) 0.70327(9) 0.59109(5) 0.0249(2) Uani 1 1 d . . . 
O3 O 0.39972(7) 0.98380(7) 0.45724(6) 0.02041(17) Uani 1 1 d . . . 
O4 O 0.65713(7) 0.81425(7) 0.49024(5) 0.01871(16) Uani 1 1 d . . . 
O5 O 0.22006(7) 0.72675(8) 0.38608(6) 0.01954(17) Uani 1 1 d . . . 
C1 C 0.46833(9) 0.61537(9) 0.41662(7) 0.01565(19) Uani 1 1 d . . . 
C1S C 0.94480(14) 0.91961(13) 0.34277(9) 0.0313(3) Uani 1 1 d . . . 
H1S1 H 0.9229 0.9817 0.3617 0.038 Uiso 1 1 calc R . . 
H1S2 H 0.9922 0.8884 0.3820 0.038 Uiso 1 1 calc R . . 
C2 C 0.43046(9) 0.72484(9) 0.53442(7) 0.01540(18) Uani 1 1 d . . . 
C3 C 0.41343(8) 0.90252(9) 0.44915(6) 0.01277(17) Uani 1 1 d . . . 
C4 C 0.58051(8) 0.79107(9) 0.46992(6) 0.01305(17) Uani 1 1 d . . . 
C5 C 0.29968(9) 0.73664(8) 0.40215(6) 0.01339(17) Uani 1 1 d . . . 
C11 C 0.34314(8) 0.75695(8) 0.24717(6) 0.01226(16) Uani 1 1 d . . . 
C12 C 0.33910(9) 0.66429(9) 0.21424(6) 0.01550(19) Uani 1 1 d . . . 
H12 H 0.3950 0.6248 0.2202 0.019 Uiso 1 1 calc R . . 
C13 C 0.25363(10) 0.62937(11) 0.17277(7) 0.0210(2) Uani 1 1 d . . . 
H13 H 0.2514 0.5667 0.1498 0.025 Uiso 1 1 calc R . . 
C14 C 0.17205(10) 0.68629(12) 0.16506(7) 0.0224(3) Uani 1 1 d . . . 
H14 H 0.1137 0.6625 0.1368 0.027 Uiso 1 1 calc R . . 
C15 C 0.17500(9) 0.77864(12) 0.19855(8) 0.0217(2) Uani 1 1 d . . . 
H15 H 0.1187 0.8174 0.1932 0.026 Uiso 1 1 calc R . . 
C16 C 0.26024(8) 0.81367(10) 0.23956(7) 0.0169(2) Uani 1 1 d . . . 
H16 H 0.2623 0.8764 0.2625 0.020 Uiso 1 1 calc R . . 
C21 C 0.47415(8) 0.92550(8) 0.28828(6) 0.01188(16) Uani 1 1 d . . . 
C22 C 0.54970(8) 0.97286(9) 0.33490(6) 0.01460(18) Uani 1 1 d . . . 
H22 H 0.5850 0.9382 0.3755 0.018 Uiso 1 1 calc R . . 
C23 C 0.57350(9) 1.06996(9) 0.32240(7) 0.0181(2) Uani 1 1 d . . . 
H23 H 0.6243 1.1019 0.3546 0.022 Uiso 1 1 calc R . . 
C24 C 0.52253(10) 1.12024(10) 0.26236(8) 0.0210(2) Uani 1 1 d . . . 
H24 H 0.5387 1.1865 0.2533 0.025 Uiso 1 1 calc R . . 
C25 C 0.44831(10) 1.07354(10) 0.21600(8) 0.0205(2) Uani 1 1 d . . . 
H25 H 0.4137 1.1082 0.1751 0.025 Uiso 1 1 calc R . . 
C26 C 0.42359(9) 0.97658(9) 0.22830(7) 0.01600(19) Uani 1 1 d . . . 
H26 H 0.3725 0.9453 0.1960 0.019 Uiso 1 1 calc R . . 
C30 C 0.51126(8) 0.81317(8) 0.08367(6) 0.01177(16) Uani 1 1 d . . . 
C31 C 0.54815(8) 0.73217(8) 0.27454(6) 0.01110(15) Uani 1 1 d . . . 
C32 C 0.55686(8) 0.73348(8) 0.20137(6) 0.01173(16) Uani 1 1 d . . . 
C33 C 0.63129(9) 0.68282(9) 0.18026(7) 0.01660(19) Uani 1 1 d . . . 
H33 H 0.6355 0.6824 0.1308 0.020 Uiso 1 1 calc R . . 
C34 C 0.69901(10) 0.63325(10) 0.23073(8) 0.0204(2) Uani 1 1 d . . . 
H34 H 0.7498 0.5995 0.2160 0.024 Uiso 1 1 calc R . . 
C35 C 0.69252(9) 0.63292(10) 0.30279(7) 0.0194(2) Uani 1 1 d . . . 
H35 H 0.7394 0.5998 0.3377 0.023 Uiso 1 1 calc R . . 
C36 C 0.61751(8) 0.68111(9) 0.32373(6) 0.01438(18) Uani 1 1 d . . . 
H36 H 0.6132 0.6793 0.3731 0.017 Uiso 1 1 calc R . . 
C37 C 0.43731(12) 0.84830(12) -0.04230(7) 0.0249(3) Uani 1 1 d . . . 
H37A H 0.4686 0.9125 -0.0309 0.037 Uiso 1 1 calc R . . 
H37B H 0.3688 0.8584 -0.0604 0.037 Uiso 1 1 calc R . . 
H37C H 0.4644 0.8148 -0.0793 0.037 Uiso 1 1 calc R . . 
C38 C 0.38872(10) 0.70201(11) 0.02062(8) 0.0218(2) Uani 1 1 d . . . 
H38A H 0.4203 0.6512 0.0542 0.033 Uiso 1 1 calc R . . 
H38B H 0.3736 0.6750 -0.0285 0.033 Uiso 1 1 calc R . . 
H38C H 0.3297 0.7227 0.0347 0.033 Uiso 1 1 calc R . . 
C39 C 0.64329(11) 0.86124(12) 0.02698(9) 0.0254(3) Uani 1 1 d . . . 
H39A H 0.6202 0.8050 -0.0045 0.038 Uiso 1 1 calc R . . 
H39B H 0.7110 0.8520 0.0486 0.038 Uiso 1 1 calc R . . 
H39C H 0.6349 0.9223 -0.0016 0.038 Uiso 1 1 calc R . . 
C40 C 0.63584(11) 0.92138(11) 0.14925(8) 0.0238(3) Uani 1 1 d . . . 
H40A H 0.5909 0.9308 0.1812 0.036 Uiso 1 1 calc R . . 
H40B H 0.6573 0.9860 0.1354 0.036 Uiso 1 1 calc R . . 
H40C H 0.6909 0.8833 0.1746 0.036 Uiso 1 1 calc R . . 
F1 F 0.29667(7) 0.89195(11) 0.07781(6) 0.0422(3) Uani 1 1 d . . . 
F2 F 0.21194(9) 1.03402(8) 0.05780(8) 0.0481(3) Uani 1 1 d . . . 
F3 F 0.22339(9) 0.93239(10) -0.03607(5) 0.0392(3) Uani 1 1 d . . . 
F4 F 0.13512(6) 0.88661(7) 0.04475(5) 0.02677(18) Uani 1 1 d . . . 
F5 F 0.19733(11) 0.99709(9) 0.55620(8) 0.0530(3) Uani 1 1 d . . . 
F6 F 0.18908(9) 0.95512(12) 0.43824(6) 0.0500(4) Uani 1 1 d . . . 
F7 F 0.09673(7) 0.87673(9) 0.50349(6) 0.0377(3) Uani 1 1 d . . . 
F8 F 0.25662(6) 0.85137(7) 0.52866(5) 0.02674(18) Uani 1 1 d . . . 
B1 B 0.21606(12) 0.93660(12) 0.03604(9) 0.0208(3) Uani 1 1 d . . . 
B2 B 0.18502(11) 0.92140(12) 0.50611(9) 0.0210(3) Uani 1 1 d . . . 
  
loop_ 
 _atom_site_aniso_label 
 _atom_site_aniso_U_11 
 _atom_site_aniso_U_22 
 _atom_site_aniso_U_33 
 _atom_site_aniso_U_23 
 _atom_site_aniso_U_13 
 _atom_site_aniso_U_12 
P1 0.00826(10) 0.01060(11) 0.00959(10) -0.00018(8) 0.00186(8) 0.00119(8) 
Re1 0.00865(2) 0.00955(2) 0.00930(2) 0.00000(1) 0.00196(1) 0.00074(1) 
Cl1S 0.0620(3) 0.0355(2) 0.0602(3) -0.0032(2) 0.0334(3) -0.0085(2) 
Cl2S 0.0360(2) 0.03123(19) 0.02707(17) 0.00150(14) 0.00105(15) -0.00437(15) 
N1 0.0098(3) 0.0170(4) 0.0119(4) 0.0007(3) 0.0034(3) -0.0004(3) 
N2 0.0133(4) 0.0175(4) 0.0122(4) 0.0001(3) 0.0021(3) -0.0007(3) 
N3 0.0129(4) 0.0176(4) 0.0182(4) 0.0014(3) 0.0056(3) -0.0039(3) 
O1 0.0271(5) 0.0138(4) 0.0378(6) -0.0010(4) 0.0152(4) 0.0011(3) 
O2 0.0296(5) 0.0304(5) 0.0157(4) 0.0060(4) 0.0076(4) 0.0035(4) 
O3 0.0187(4) 0.0135(4) 0.0288(5) -0.0039(3) 0.0046(4) 0.0018(3) 
O4 0.0123(4) 0.0209(4) 0.0215(4) 0.0005(3) 0.0004(3) 0.0004(3) 
O5 0.0126(4) 0.0255(5) 0.0201(4) -0.0002(3) 0.0024(3) -0.0045(3) 
C1 0.0161(5) 0.0145(4) 0.0179(5) 0.0011(4) 0.0070(4) 0.0001(3) 
C1S 0.0395(9) 0.0230(7) 0.0305(8) 0.0003(5) 0.0052(6) -0.0022(6) 
C2 0.0159(5) 0.0162(5) 0.0143(4) 0.0014(3) 0.0039(4) 0.0014(4) 
C3 0.0103(4) 0.0142(4) 0.0138(4) -0.0018(3) 0.0023(3) 0.0004(3) 
C4 0.0122(4) 0.0139(4) 0.0128(4) 0.0005(3) 0.0019(3) 0.0019(3) 
C5 0.0136(4) 0.0139(4) 0.0131(4) -0.0004(3) 0.0036(3) -0.0012(3) 
C11 0.0100(4) 0.0167(4) 0.0100(4) -0.0002(3) 0.0020(3) -0.0001(3) 
C12 0.0138(4) 0.0177(5) 0.0160(5) -0.0037(4) 0.0054(4) -0.0034(4) 
C13 0.0186(5) 0.0274(6) 0.0180(5) -0.0068(4) 0.0064(4) -0.0104(4) 
C14 0.0142(5) 0.0389(8) 0.0137(5) -0.0034(5) 0.0021(4) -0.0090(5) 
C15 0.0104(4) 0.0345(7) 0.0193(5) 0.0027(5) 0.0013(4) 0.0008(5) 
C16 0.0112(4) 0.0234(5) 0.0155(5) -0.0003(4) 0.0014(4) 0.0023(4) 
C21 0.0122(4) 0.0115(4) 0.0125(4) 0.0009(3) 0.0038(3) 0.0019(3) 
C22 0.0137(4) 0.0155(4) 0.0148(4) 0.0005(3) 0.0035(4) -0.0018(3) 
C23 0.0167(5) 0.0159(5) 0.0235(6) -0.0014(4) 0.0086(4) -0.0033(4) 
C24 0.0237(6) 0.0130(5) 0.0295(6) 0.0040(4) 0.0127(5) 0.0011(4) 
C25 0.0235(6) 0.0157(5) 0.0232(6) 0.0065(4) 0.0074(5) 0.0049(4) 
C26 0.0165(5) 0.0156(5) 0.0154(5) 0.0027(3) 0.0022(4) 0.0033(4) 
C30 0.0099(4) 0.0135(4) 0.0126(4) 0.0004(3) 0.0039(3) 0.0002(3) 
C31 0.0098(4) 0.0116(4) 0.0123(4) -0.0009(3) 0.0031(3) 0.0013(3) 
C32 0.0116(4) 0.0118(4) 0.0124(4) -0.0002(3) 0.0038(3) -0.0006(3) 
C33 0.0170(5) 0.0185(5) 0.0165(5) -0.0001(4) 0.0085(4) 0.0038(4) 
C34 0.0170(5) 0.0233(6) 0.0230(6) 0.0006(4) 0.0094(4) 0.0079(4) 
C35 0.0150(5) 0.0231(6) 0.0202(5) 0.0013(4) 0.0043(4) 0.0087(4) 
C36 0.0131(4) 0.0158(5) 0.0142(4) -0.0002(3) 0.0026(3) 0.0039(3) 
C37 0.0313(7) 0.0272(7) 0.0143(5) 0.0050(5) 0.0006(5) 0.0002(5) 
C38 0.0186(5) 0.0259(6) 0.0198(5) -0.0041(4) 0.0017(4) -0.0082(4) 
C39 0.0216(6) 0.0264(7) 0.0337(7) 0.0049(5) 0.0181(6) -0.0016(5) 
C40 0.0212(6) 0.0221(6) 0.0254(6) 0.0013(5) -0.0011(5) -0.0099(5) 
F1 0.0200(5) 0.0761(9) 0.0274(5) -0.0123(5) -0.0017(4) 0.0097(5) 
F2 0.0532(7) 0.0231(5) 0.0825(9) -0.0246(5) 0.0474(7) -0.0176(5) 
F3 0.0458(7) 0.0515(7) 0.0217(5) -0.0044(4) 0.0104(4) -0.0002(5) 
F4 0.0213(4) 0.0189(4) 0.0392(5) -0.0042(3) 0.0044(4) -0.0060(3) 
F5 0.0671(9) 0.0315(6) 0.0581(8) -0.0161(6) 0.0080(7) 0.0167(6) 
F6 0.0394(6) 0.0783(10) 0.0325(6) 0.0287(6) 0.0082(5) -0.0113(6) 
F7 0.0174(4) 0.0488(7) 0.0477(6) 0.0253(5) 0.0088(4) 0.0021(4) 
F8 0.0191(4) 0.0252(4) 0.0350(5) -0.0039(4) 0.0036(3) 0.0063(3) 
B1 0.0215(7) 0.0194(6) 0.0221(6) -0.0091(5) 0.0065(5) -0.0039(5) 
B2 0.0192(6) 0.0222(6) 0.0228(7) 0.0057(5) 0.0075(5) 0.0031(5) 
  
_geom_special_details 
; 
 All esds (except the esd in the dihedral angle between two l.s. planes) 
 are estimated using the full covariance matrix.  The cell esds are taken 
 into account individually in the estimation of esds in distances, angles 
 and torsion angles; correlations between esds in cell parameters are only 
 used when they are defined by crystal symmetry.  An approximate (isotropic) 
 treatment of cell esds is used for estimating esds involving l.s. planes. 
; 
  
loop_ 
 _geom_bond_atom_site_label_1 
 _geom_bond_atom_site_label_2 
 _geom_bond_distance 
 _geom_bond_site_symmetry_2 
 _geom_bond_publ_flag 
P1 C11 1.8180(12) . ? 
P1 C21 1.8251(11) . ? 
P1 C31 1.8285(11) . ? 
P1 Re1 2.4887(3) . ? 
Re1 C2 1.9949(12) . ? 
Re1 C3 1.9989(11) . ? 
Re1 C4 2.0082(12) . ? 
Re1 C5 2.0248(12) . ? 
Re1 C1 2.0367(12) . ? 
Cl1S C1S 1.7661(19) . ? 
Cl2S C1S 1.7721(18) . ? 
N1 C30 1.3692(14) . ? 
N1 C32 1.4161(15) . ? 
N2 C30 1.3226(15) . ? 
N2 C37 1.4600(17) . ? 
N2 C38 1.4682(17) . ? 
N3 C30 1.3341(15) . ? 
N3 C40 1.4578(17) . ? 
N3 C39 1.4715(18) . ? 
O1 C1 1.1264(15) . ? 
O2 C2 1.1282(15) . ? 
O3 C3 1.1327(14) . ? 
O4 C4 1.1299(14) . ? 
O5 C5 1.1265(15) . ? 
C11 C12 1.3952(16) . ? 
C11 C16 1.3970(17) . ? 
C12 C13 1.3922(17) . ? 
C13 C14 1.383(2) . ? 
C14 C15 1.397(2) . ? 
C15 C16 1.3869(18) . ? 
C21 C26 1.3950(16) . ? 
C21 C22 1.4006(16) . ? 
C22 C23 1.3896(17) . ? 
C23 C24 1.393(2) . ? 
C24 C25 1.382(2) . ? 
C25 C26 1.3907(18) . ? 
C31 C36 1.3944(16) . ? 
C31 C32 1.4160(16) . ? 
C32 C33 1.3957(16) . ? 
C33 C34 1.3841(18) . ? 
C34 C35 1.3859(19) . ? 
C35 C36 1.3851(17) . ? 
F1 B1 1.394(2) . ? 
F2 B1 1.3852(18) . ? 
F3 B1 1.3914(19) . ? 
F4 B1 1.3829(18) . ? 
F5 B2 1.381(2) . ? 
F6 B2 1.3754(19) . ? 
F7 B2 1.3948(19) . ? 
F8 B2 1.3963(18) . ? 
  
loop_ 
 _geom_angle_atom_site_label_1 
 _geom_angle_atom_site_label_2 
 _geom_angle_atom_site_label_3 
 _geom_angle 
 _geom_angle_site_symmetry_1 
 _geom_angle_site_symmetry_3 
 _geom_angle_publ_flag 
C11 P1 C21 108.29(5) . . ? 
C11 P1 C31 105.19(5) . . ? 
C21 P1 C31 102.73(5) . . ? 
C11 P1 Re1 108.83(4) . . ? 
C21 P1 Re1 115.05(4) . . ? 
C31 P1 Re1 116.05(4) . . ? 
C2 Re1 C3 92.13(5) . . ? 
C2 Re1 C4 90.10(5) . . ? 
C3 Re1 C4 88.20(5) . . ? 
C2 Re1 C5 88.28(5) . . ? 
C3 Re1 C5 88.46(5) . . ? 
C4 Re1 C5 176.23(5) . . ? 
C2 Re1 C1 88.83(5) . . ? 
C3 Re1 C1 178.66(5) . . ? 
C4 Re1 C1 92.74(5) . . ? 
C5 Re1 C1 90.64(5) . . ? 
C2 Re1 P1 177.19(4) . . ? 
C3 Re1 P1 90.33(3) . . ? 
C4 Re1 P1 91.34(3) . . ? 
C5 Re1 P1 90.42(3) . . ? 
C1 Re1 P1 88.69(3) . . ? 
C30 N1 C32 122.03(10) . . ? 
C30 N2 C37 122.76(11) . . ? 
C30 N2 C38 120.79(10) . . ? 
C37 N2 C38 115.98(11) . . ? 
C30 N3 C40 121.62(11) . . ? 
C30 N3 C39 121.77(11) . . ? 
C40 N3 C39 115.35(11) . . ? 
O1 C1 Re1 178.89(12) . . ? 
Cl1S C1S Cl2S 110.20(10) . . ? 
O2 C2 Re1 178.58(12) . . ? 
O3 C3 Re1 178.16(11) . . ? 
O4 C4 Re1 175.84(11) . . ? 
O5 C5 Re1 177.12(11) . . ? 
C12 C11 C16 119.49(11) . . ? 
C12 C11 P1 119.32(9) . . ? 
C16 C11 P1 120.85(9) . . ? 
C13 C12 C11 120.37(12) . . ? 
C14 C13 C12 119.76(13) . . ? 
C13 C14 C15 120.36(12) . . ? 
C16 C15 C14 119.90(13) . . ? 
C15 C16 C11 120.11(13) . . ? 
C26 C21 C22 119.17(11) . . ? 
C26 C21 P1 123.75(9) . . ? 
C22 C21 P1 116.95(8) . . ? 
C23 C22 C21 120.68(11) . . ? 
C22 C23 C24 119.64(12) . . ? 
C25 C24 C23 119.83(12) . . ? 
C24 C25 C26 120.94(12) . . ? 
C25 C26 C21 119.72(12) . . ? 
N2 C30 N3 122.45(11) . . ? 
N2 C30 N1 118.05(10) . . ? 
N3 C30 N1 119.49(10) . . ? 
C36 C31 C32 117.50(10) . . ? 
C36 C31 P1 119.12(8) . . ? 
C32 C31 P1 123.36(8) . . ? 
C33 C32 C31 120.22(10) . . ? 
C33 C32 N1 118.26(10) . . ? 
C31 C32 N1 121.50(10) . . ? 
C34 C33 C32 120.57(11) . . ? 
C33 C34 C35 119.87(11) . . ? 
C36 C35 C34 119.76(12) . . ? 
C35 C36 C31 122.04(11) . . ? 
F4 B1 F2 109.90(12) . . ? 
F4 B1 F3 109.56(12) . . ? 
F2 B1 F3 110.30(14) . . ? 
F4 B1 F1 109.76(14) . . ? 
F2 B1 F1 109.00(13) . . ? 
F3 B1 F1 108.29(13) . . ? 
F6 B2 F5 111.75(14) . . ? 
F6 B2 F7 109.05(13) . . ? 
F5 B2 F7 109.26(14) . . ? 
F6 B2 F8 109.74(13) . . ? 
F5 B2 F8 108.24(13) . . ? 
F7 B2 F8 108.75(12) . . ? 
  
loop_ 
 _geom_hbond_atom_site_label_D 
 _geom_hbond_atom_site_label_H 
 _geom_hbond_atom_site_label_A 
 _geom_hbond_distance_DH 
 _geom_hbond_distance_HA 
 _geom_hbond_distance_DA 
 _geom_hbond_angle_DHA 
 _geom_hbond_site_symmetry_A 
N1 H1 F1  0.823(14) 2.608(18) 3.1687(15) 126.6(16) . 
  
_diffrn_measured_fraction_theta_max    0.999 
_diffrn_reflns_theta_full              42.13 
_diffrn_measured_fraction_theta_full   0.999 
_refine_diff_density_max    1.474 
_refine_diff_density_min   -1.174 
_refine_diff_density_rms    0.167 

#===END
 
data_12 
  
_audit_creation_method            SHELXL-97 
_chemical_name_systematic 
; 
 ? 
; 
_chemical_name_common             ? 
_chemical_melting_point           ? 
_chemical_formula_moiety          ? 
_chemical_formula_sum 
 'C26 H26 B2 F8 N2 O5 P Re' 
_chemical_formula_weight          837.28 
  
loop_ 
 _atom_type_symbol 
 _atom_type_description 
 _atom_type_scat_dispersion_real 
 _atom_type_scat_dispersion_imag 
 _atom_type_scat_source 
 'C'  'C'   0.0033   0.0016 
 'International Tables Vol C Tables 4.2.6.8 and 6.1.1.4' 
 'H'  'H'   0.0000   0.0000 
 'International Tables Vol C Tables 4.2.6.8 and 6.1.1.4' 
 'B'  'B'   0.0013   0.0007 
 'International Tables Vol C Tables 4.2.6.8 and 6.1.1.4' 
 'N'  'N'   0.0061   0.0033 
 'International Tables Vol C Tables 4.2.6.8 and 6.1.1.4' 
 'O'  'O'   0.0106   0.0060 
 'International Tables Vol C Tables 4.2.6.8 and 6.1.1.4' 
 'F'  'F'   0.0171   0.0103 
 'International Tables Vol C Tables 4.2.6.8 and 6.1.1.4' 
 'P'  'P'   0.1023   0.0942 
 'International Tables Vol C Tables 4.2.6.8 and 6.1.1.4' 
 'Re'  'Re'  -1.0185   7.2310 
 'International Tables Vol C Tables 4.2.6.8 and 6.1.1.4' 
  
_symmetry_cell_setting            Orthorhombic 
_symmetry_space_group_name_H-M    Pca2(1) 
  
loop_ 
 _symmetry_equiv_pos_as_xyz 
 'x, y, z' 
 '-x, -y, z+1/2' 
 'x+1/2, -y, z' 
 '-x+1/2, y, z+1/2' 
  
_cell_length_a                    14.5260(9) 
_cell_length_b                    13.7856(9) 
_cell_length_c                    14.5321(9) 
_cell_angle_alpha                 90.00 
_cell_angle_beta                  90.00 
_cell_angle_gamma                 90.00 
_cell_volume                      2910.0(3) 
_cell_formula_units_Z             4 
_cell_measurement_temperature     100(2) 
_cell_measurement_reflns_used     9659 
_cell_measurement_theta_min       2.47 
_cell_measurement_theta_max       39.43 
  
_exptl_crystal_description        shard 
_exptl_crystal_colour             colourless 
_exptl_crystal_size_max           0.34 
_exptl_crystal_size_mid           0.23 
_exptl_crystal_size_min           0.19 
_exptl_crystal_density_meas       ? 
_exptl_crystal_density_diffrn     1.911 
_exptl_crystal_density_method     'not measured' 
_exptl_crystal_F_000              1632 
_exptl_absorpt_coefficient_mu     4.323 
_exptl_absorpt_correction_type    multi-scan 
_exptl_absorpt_correction_T_min   0.3245 
_exptl_absorpt_correction_T_max   0.4954 
_exptl_absorpt_process_details    sadabs 
  
_exptl_special_details 
; 
 ? 
; 
  
_diffrn_ambient_temperature       100(2) 
_diffrn_radiation_wavelength      0.71073 
_diffrn_radiation_type            MoK\a 
_diffrn_radiation_source          'fine-focus sealed tube' 
_diffrn_radiation_monochromator   graphite 
_diffrn_measurement_device_type   'Bruker APEX-II CCD' 
_diffrn_measurement_method        '\f and \w scans' 
_diffrn_detector_area_resol_mean  ? 
_diffrn_reflns_number             201771 
_diffrn_reflns_av_R_equivalents   0.0561 
_diffrn_reflns_av_sigmaI/netI     0.0320 
_diffrn_reflns_limit_h_min        -25 
_diffrn_reflns_limit_h_max        25 
_diffrn_reflns_limit_k_min        -24 
_diffrn_reflns_limit_k_max        24 
_diffrn_reflns_limit_l_min        -24 
_diffrn_reflns_limit_l_max        24 
_diffrn_reflns_theta_min          2.04 
_diffrn_reflns_theta_max          38.58 
_reflns_number_total              16219 
_reflns_number_gt                 13809 
_reflns_threshold_expression      >2sigma(I) 
  
_computing_data_collection        'Bruker APEX2' 
_computing_cell_refinement        'Bruker SAINT' 
_computing_data_reduction         'Bruker SAINT' 
_computing_structure_solution     'SHELXS-97 (Sheldrick, 2008)' 
_computing_structure_refinement   'SHELXL-97 (Sheldrick, 2008)' 
_computing_molecular_graphics     'Bruker SHELXTL' 
_computing_publication_material   'Bruker SHELXTL' 
  
_refine_special_details 
; 
 Refinement of F^2^ against ALL reflections.  The weighted R-factor wR and 
 goodness of fit S are based on F^2^, conventional R-factors R are based 
 on F, with F set to zero for negative F^2^. The threshold expression of 
 F^2^ > 2sigma(F^2^) is used only for calculating R-factors(gt) etc. and is 
 not relevant to the choice of reflections for refinement.  R-factors based 
 on F^2^ are statistically about twice as large as those based on F, and R- 
 factors based on ALL data will be even larger. 
; 
  
_refine_ls_structure_factor_coef  Fsqd 
_refine_ls_matrix_type            full 
_refine_ls_weighting_scheme       calc 
_refine_ls_weighting_details 
 'calc w=1/[\s^2^(Fo^2^)+(0.0230P)^2^+1.8757P] where P=(Fo^2^+2Fc^2^)/3' 
_atom_sites_solution_primary      direct 
_atom_sites_solution_secondary    difmap 
_atom_sites_solution_hydrogens    geom 
_refine_ls_hydrogen_treatment     mixed 
_refine_ls_extinction_method      none 
_refine_ls_extinction_coef        ? 
_refine_ls_abs_structure_details 
 'Flack H D (1983), Acta Cryst. A39, 876-881' 
_refine_ls_abs_structure_Flack    -0.004(4) 
_refine_ls_number_reflns          16219 
_refine_ls_number_parameters      410 
_refine_ls_number_restraints      2 
_refine_ls_R_factor_all           0.0373 
_refine_ls_R_factor_gt            0.0259 
_refine_ls_wR_factor_ref          0.0589 
_refine_ls_wR_factor_gt           0.0548 
_refine_ls_goodness_of_fit_ref    1.082 
_refine_ls_restrained_S_all       1.082 
_refine_ls_shift/su_max           0.010 
_refine_ls_shift/su_mean          0.000 
  
loop_ 
 _atom_site_label 
 _atom_site_type_symbol 
 _atom_site_fract_x 
 _atom_site_fract_y 
 _atom_site_fract_z 
 _atom_site_U_iso_or_equiv 
 _atom_site_adp_type 
 _atom_site_occupancy 
 _atom_site_symmetry_multiplicity 
 _atom_site_calc_flag 
 _atom_site_refinement_flags 
 _atom_site_disorder_assembly 
 _atom_site_disorder_group 
P1 P 0.48235(4) 2.72376(4) 1.35221(4) 0.01240(9) Uani 1 1 d . . . 
Re1 Re 0.402731(4) 2.733708(4) 1.512199(10) 0.01184(2) Uani 1 1 d . . . 
C1 C 0.52254(18) 2.75837(19) 1.57968(19) 0.0221(4) Uani 1 1 d . . . 
C2 C 0.33769(16) 2.73096(15) 1.63818(17) 0.0168(4) Uani 1 1 d . . . 
C3 C 0.28364(15) 2.70336(16) 1.44560(16) 0.0163(4) Uani 1 1 d . . . 
C4 C 0.42591(17) 2.59677(16) 1.53119(15) 0.0181(4) Uani 1 1 d . . . 
C5 C 0.37516(15) 2.86857(15) 1.5018(2) 0.0168(5) Uani 1 1 d . . . 
C11 C 0.49340(17) 2.60301(14) 1.31970(15) 0.0162(4) Uani 1 1 d . . . 
C12 C 0.41304(19) 2.55479(17) 1.29482(18) 0.0212(4) Uani 1 1 d . . . 
H12 H 0.3563 2.5888 1.2915 0.025 Uiso 1 1 calc R . . 
C13 C 0.4166(2) 2.46070(18) 1.27583(19) 0.0278(6) Uani 1 1 d . . . 
H13 H 0.3626 2.4260 1.2593 0.033 Uiso 1 1 calc R . . 
C14 C 0.5000(3) 2.41507(18) 1.2807(2) 0.0361(8) Uani 1 1 d . . . 
H14 H 0.5033 2.3481 1.2656 0.043 Uiso 1 1 calc R . . 
C15 C 0.5788(2) 2.4618(2) 1.3064(2) 0.0329(7) Uani 1 1 d . . . 
H15 H 0.6355 2.4275 1.3088 0.039 Uiso 1 1 calc R . . 
C16 C 0.5760(2) 2.55537(18) 1.32786(18) 0.0232(5) Uani 1 1 d . . . 
H16 H 0.6296 2.5884 1.3483 0.028 Uiso 1 1 calc R . . 
C20 C 0.41515(15) 2.77277(14) 1.24769(17) 0.0152(4) Uani 1 1 d . . . 
H20 H 0.3611 2.7282 1.2423 0.018 Uiso 1 1 calc R . . 
C21 C 0.37337(17) 2.86911(16) 1.26712(18) 0.0185(4) Uani 1 1 d . . . 
H21A H 0.4146 2.9073 1.3075 0.022 Uiso 1 1 calc R . . 
H21B H 0.3138 2.8606 1.2991 0.022 Uiso 1 1 calc R . . 
C22 C 0.35815(18) 2.92416(17) 1.17373(19) 0.0232(5) Uani 1 1 d . . . 
H22A H 0.3364 2.8777 1.1266 0.028 Uiso 1 1 calc R . . 
H22B H 0.3099 2.9741 1.1820 0.028 Uiso 1 1 calc R . . 
C23 C 0.4467(2) 2.97265(17) 1.1401(2) 0.0243(5) Uani 1 1 d . . . 
H23A H 0.4433 2.9806 1.0725 0.029 Uiso 1 1 calc R . . 
H23B H 0.4511 3.0381 1.1677 0.029 Uiso 1 1 calc R . . 
C24 C 0.53238(17) 2.91657(15) 1.16353(18) 0.0201(4) Uani 1 1 d . . . 
H24A H 0.5874 2.9516 1.1409 0.024 Uiso 1 1 calc R . . 
H24B H 0.5377 2.9093 1.2311 0.024 Uiso 1 1 calc R . . 
C25 C 0.46609(16) 2.76254(14) 1.15234(16) 0.0159(3) Uani 1 1 d . . . 
C26 C 0.58408(17) 2.80879(18) 1.03463(17) 0.0214(5) Uani 1 1 d . . . 
H26A H 0.5599 2.8512 0.9852 0.026 Uiso 1 1 calc R . . 
H26B H 0.6484 2.8284 1.0470 0.026 Uiso 1 1 calc R . . 
C27 C 0.58308(17) 2.70818(19) 1.0027(3) 0.0235(6) Uani 1 1 d . . . 
H27A H 0.6205 2.6670 1.0442 0.028 Uiso 1 1 calc R . . 
H27B H 0.6091 2.7039 0.9399 0.028 Uiso 1 1 calc R . . 
C28 C 0.48492(17) 2.67474(16) 1.0028(2) 0.0223(5) Uani 1 1 d . . . 
H28A H 0.4816 2.6054 0.9854 0.027 Uiso 1 1 calc R . . 
H28B H 0.4486 2.7128 0.9579 0.027 Uiso 1 1 calc R . . 
C31 C 0.59514(15) 2.77633(17) 1.34496(19) 0.0181(4) Uani 1 1 d . . . 
C32 C 0.6618(2) 2.7454(2) 1.2790(2) 0.0286(6) Uani 1 1 d . . . 
H32 H 0.6476 2.6940 1.2378 0.034 Uiso 1 1 calc R . . 
C33 C 0.7466(3) 2.7898(3) 1.2748(3) 0.0467(12) Uani 1 1 d . . . 
H33 H 0.7918 2.7683 1.2323 0.056 Uiso 1 1 calc R . . 
C34 C 0.7647(2) 2.8658(3) 1.3335(3) 0.0449(10) Uani 1 1 d . . . 
H34 H 0.8231 2.8967 1.3317 0.054 Uiso 1 1 calc R . . 
C35 C 0.6986(2) 2.8978(2) 1.3951(3) 0.0383(8) Uani 1 1 d . . . 
H35 H 0.7119 2.9515 1.4338 0.046 Uiso 1 1 calc R . . 
C36 C 0.61406(18) 2.85344(19) 1.4014(2) 0.0244(5) Uani 1 1 d . . . 
H36 H 0.5695 2.8759 1.4443 0.029 Uiso 1 1 calc R . . 
N1 N 0.44658(15) 2.68906(13) 1.09934(14) 0.0186(4) Uani 1 1 d D . . 
H1 H 0.4032(18) 2.651(2) 1.120(3) 0.022 Uiso 1 1 d D . . 
N2 N 0.52694(14) 2.82382(13) 1.12139(14) 0.0171(3) Uani 1 1 d . . . 
O1 O 0.58911(16) 2.7731(2) 1.6184(2) 0.0405(6) Uani 1 1 d . . . 
O2 O 0.29872(14) 2.72739(13) 1.70898(14) 0.0231(3) Uani 1 1 d . . . 
O3 O 0.21695(12) 2.68558(14) 1.40929(14) 0.0229(3) Uani 1 1 d . . . 
O4 O 0.43561(15) 2.52183(13) 1.54828(16) 0.0291(4) Uani 1 1 d . . . 
O5 O 0.35738(13) 2.94410(12) 1.50134(17) 0.0249(4) Uani 1 1 d . . . 
B1 B 0.7884(2) 2.5240(2) 1.0604(2) 0.0243(5) Uani 1 1 d . . . 
F1 F 0.74349(14) 2.51982(14) 0.97157(13) 0.0324(4) Uani 1 1 d . . . 
F2 F 0.73957(14) 2.57778(14) 1.12493(14) 0.0367(4) Uani 1 1 d . . . 
F3 F 0.79443(15) 2.43436(13) 1.09807(15) 0.0407(5) Uani 1 1 d . . . 
F4 F 0.87573(16) 2.5593(2) 1.04979(16) 0.0521(6) Uani 1 1 d . . . 
B2 B 0.4213(2) 1.8890(2) 0.8319(3) 0.0273(6) Uani 1 1 d . . . 
F5 F 0.36262(16) 1.86842(14) 0.90821(17) 0.0454(5) Uani 1 1 d . . . 
F6 F 0.37219(15) 1.91792(14) 0.75174(16) 0.0417(5) Uani 1 1 d . . . 
F7 F 0.47154(15) 1.81044(12) 0.80744(15) 0.0372(4) Uani 1 1 d . . . 
F8 F 0.48340(14) 1.95733(11) 0.86165(14) 0.0313(4) Uani 1 1 d . . . 
  
loop_ 
 _atom_site_aniso_label 
 _atom_site_aniso_U_11 
 _atom_site_aniso_U_22 
 _atom_site_aniso_U_33 
 _atom_site_aniso_U_23 
 _atom_site_aniso_U_13 
 _atom_site_aniso_U_12 
P1 0.0124(2) 0.01023(18) 0.0145(2) 0.00004(16) 0.00158(17) 0.00058(15) 
Re1 0.01138(2) 0.01090(2) 0.01324(3) -0.00169(5) 0.00066(5) 0.00035(2) 
C1 0.0190(10) 0.0276(11) 0.0196(10) 0.0002(8) -0.0027(8) -0.0008(8) 
C2 0.0173(9) 0.0155(8) 0.0176(9) -0.0015(7) -0.0011(7) 0.0016(7) 
C3 0.0182(9) 0.0145(7) 0.0160(9) 0.0012(7) 0.0030(7) 0.0005(7) 
C4 0.0224(9) 0.0163(7) 0.0156(12) 0.0000(6) 0.0039(7) 0.0028(7) 
C5 0.0160(7) 0.0180(7) 0.0165(14) -0.0030(8) -0.0039(8) -0.0010(6) 
C11 0.0260(10) 0.0110(7) 0.0116(9) 0.0003(6) 0.0016(7) 0.0036(7) 
C12 0.0325(13) 0.0124(8) 0.0188(10) 0.0007(7) 0.0011(9) -0.0005(8) 
C13 0.0538(18) 0.0134(8) 0.0161(11) 0.0008(8) -0.0015(11) -0.0041(10) 
C14 0.076(2) 0.0119(8) 0.0198(12) -0.0012(8) 0.0038(14) 0.0105(12) 
C15 0.0508(18) 0.0206(11) 0.0273(14) 0.0005(10) -0.0008(12) 0.0205(12) 
C16 0.0302(12) 0.0200(9) 0.0193(11) 0.0030(8) -0.0021(9) 0.0111(9) 
C20 0.0165(9) 0.0116(7) 0.0176(9) 0.0018(7) 0.0004(7) 0.0000(6) 
C21 0.0200(9) 0.0126(8) 0.0230(11) 0.0013(7) 0.0011(8) 0.0036(7) 
C22 0.0260(11) 0.0173(8) 0.0262(12) 0.0042(8) -0.0025(10) 0.0068(8) 
C23 0.0337(14) 0.0119(8) 0.0274(13) 0.0041(8) -0.0009(11) 0.0015(9) 
C24 0.0247(11) 0.0118(7) 0.0238(11) 0.0016(7) 0.0004(8) -0.0037(7) 
C25 0.0188(9) 0.0113(7) 0.0175(9) 0.0012(7) -0.0014(7) 0.0008(7) 
C26 0.0220(10) 0.0220(9) 0.0202(11) 0.0014(7) 0.0055(7) -0.0002(8) 
C27 0.0282(10) 0.0246(8) 0.0175(16) 0.0000(10) 0.0030(11) 0.0070(8) 
C28 0.0295(10) 0.0171(7) 0.0202(15) -0.0016(9) 0.0004(11) 0.0026(7) 
C31 0.0134(8) 0.0204(9) 0.0206(11) 0.0055(8) 0.0016(7) 0.0003(7) 
C32 0.0191(11) 0.0370(13) 0.0296(14) 0.0102(11) 0.0092(10) 0.0068(10) 
C33 0.0181(11) 0.065(2) 0.058(3) 0.034(2) 0.0125(16) 0.0063(18) 
C34 0.0196(12) 0.053(2) 0.062(2) 0.0324(19) -0.0054(14) -0.0122(12) 
C35 0.0261(13) 0.0339(14) 0.055(2) 0.0163(14) -0.0135(13) -0.0169(11) 
C36 0.0192(10) 0.0196(9) 0.0342(14) 0.0047(9) -0.0060(9) -0.0054(8) 
N1 0.0255(10) 0.0119(7) 0.0184(9) -0.0011(6) -0.0013(7) -0.0017(6) 
N2 0.0189(8) 0.0146(7) 0.0178(9) 0.0008(6) 0.0017(7) 0.0010(6) 
O1 0.0265(11) 0.0564(18) 0.0387(15) 0.0044(12) -0.0133(9) -0.0092(9) 
O2 0.0220(8) 0.0269(8) 0.0206(8) -0.0015(7) 0.0052(7) 0.0009(6) 
O3 0.0198(8) 0.0232(8) 0.0256(9) 0.0028(7) -0.0048(7) -0.0041(6) 
O4 0.0338(10) 0.0171(7) 0.0363(11) 0.0028(7) 0.0035(9) 0.0064(7) 
O5 0.0312(8) 0.0151(6) 0.0285(12) -0.0033(7) -0.0019(9) 0.0035(5) 
B1 0.0220(13) 0.0275(12) 0.0235(14) -0.0040(10) 0.0004(11) 0.0024(11) 
F1 0.0300(9) 0.0385(10) 0.0285(9) -0.0024(7) -0.0044(7) -0.0005(8) 
F2 0.0405(10) 0.0337(9) 0.0360(10) -0.0100(8) -0.0025(8) 0.0164(8) 
F3 0.0515(12) 0.0228(7) 0.0479(12) -0.0069(8) -0.0169(10) 0.0125(8) 
F4 0.0358(10) 0.0874(19) 0.0333(11) -0.0041(11) 0.0008(9) -0.0260(12) 
B2 0.0359(15) 0.0122(9) 0.0337(16) 0.0042(10) -0.0037(13) -0.0016(10) 
F5 0.0558(13) 0.0244(8) 0.0562(14) 0.0013(9) 0.0181(11) -0.0104(9) 
F6 0.0437(10) 0.0229(8) 0.0584(14) 0.0140(9) -0.0239(10) -0.0092(8) 
F7 0.0490(11) 0.0176(7) 0.0449(11) -0.0023(7) -0.0029(9) 0.0057(7) 
F8 0.0376(10) 0.0158(6) 0.0405(11) 0.0033(7) -0.0091(8) -0.0060(7) 
  
_geom_special_details 
; 
 All esds (except the esd in the dihedral angle between two l.s. planes) 
 are estimated using the full covariance matrix.  The cell esds are taken 
 into account individually in the estimation of esds in distances, angles 
 and torsion angles; correlations between esds in cell parameters are only 
 used when they are defined by crystal symmetry.  An approximate (isotropic) 
 treatment of cell esds is used for estimating esds involving l.s. planes. 
; 
  
loop_ 
 _geom_bond_atom_site_label_1 
 _geom_bond_atom_site_label_2 
 _geom_bond_distance 
 _geom_bond_site_symmetry_2 
 _geom_bond_publ_flag 
P1 C11 1.738(2) . ? 
P1 C31 1.795(2) . ? 
P1 C20 1.928(2) . ? 
P1 Re1 2.6004(6) . ? 
Re1 C5 1.908(2) . ? 
Re1 C4 1.937(2) . ? 
Re1 C3 2.026(2) . ? 
Re1 C1 2.026(3) . ? 
Re1 C2 2.061(2) . ? 
C1 O1 1.137(3) . ? 
C2 O2 1.175(3) . ? 
C3 O3 1.130(3) . ? 
C4 O4 1.072(3) . ? 
C5 O5 1.073(3) . ? 
C11 C16 1.373(3) . ? 
C11 C12 1.391(4) . ? 
C12 C13 1.327(3) . ? 
C13 C14 1.368(5) . ? 
C14 C15 1.365(5) . ? 
C15 C16 1.328(4) . ? 
C20 C21 1.487(3) . ? 
C20 C25 1.577(3) . ? 
C21 C22 1.571(4) . ? 
C22 C23 1.530(4) . ? 
C23 C24 1.504(4) . ? 
C24 N2 1.420(3) . ? 
C25 N2 1.303(3) . ? 
C25 N1 1.304(3) . ? 
C26 C27 1.462(4) . ? 
C26 N2 1.524(3) . ? 
C27 C28 1.499(4) . ? 
C28 N1 1.522(4) . ? 
C31 C36 1.371(4) . ? 
C31 C32 1.428(4) . ? 
C32 C33 1.377(6) . ? 
C33 C34 1.377(7) . ? 
C34 C35 1.385(6) . ? 
C35 C36 1.374(4) . ? 
B1 F3 1.354(4) . ? 
B1 F4 1.368(4) . ? 
B1 F2 1.390(4) . ? 
B1 F1 1.448(4) . ? 
B2 F7 1.353(4) . ? 
B2 F8 1.374(4) . ? 
B2 F6 1.424(4) . ? 
B2 F5 1.427(4) . ? 
  
loop_ 
 _geom_angle_atom_site_label_1 
 _geom_angle_atom_site_label_2 
 _geom_angle_atom_site_label_3 
 _geom_angle 
 _geom_angle_site_symmetry_1 
 _geom_angle_site_symmetry_3 
 _geom_angle_publ_flag 
C11 P1 C31 106.65(12) . . ? 
C11 P1 C20 99.69(10) . . ? 
C31 P1 C20 105.93(11) . . ? 
C11 P1 Re1 109.55(8) . . ? 
C31 P1 Re1 115.93(9) . . ? 
C20 P1 Re1 117.44(7) . . ? 
C5 Re1 C4 175.84(11) . . ? 
C5 Re1 C3 89.09(9) . . ? 
C4 Re1 C3 90.87(10) . . ? 
C5 Re1 C1 93.17(11) . . ? 
C4 Re1 C1 86.86(11) . . ? 
C3 Re1 C1 177.73(10) . . ? 
C5 Re1 C2 89.56(11) . . ? 
C4 Re1 C2 86.28(9) . . ? 
C3 Re1 C2 91.67(9) . . ? 
C1 Re1 C2 88.10(10) . . ? 
C5 Re1 P1 94.23(9) . . ? 
C4 Re1 P1 89.92(7) . . ? 
C3 Re1 P1 86.66(6) . . ? 
C1 Re1 P1 93.42(8) . . ? 
C2 Re1 P1 175.84(6) . . ? 
O1 C1 Re1 179.0(3) . . ? 
O2 C2 Re1 178.0(2) . . ? 
O3 C3 Re1 179.1(2) . . ? 
O4 C4 Re1 174.3(2) . . ? 
O5 C5 Re1 175.4(3) . . ? 
C16 C11 C12 121.8(2) . . ? 
C16 C11 P1 121.0(2) . . ? 
C12 C11 P1 116.80(18) . . ? 
C13 C12 C11 119.2(3) . . ? 
C12 C13 C14 118.2(3) . . ? 
C15 C14 C13 122.7(2) . . ? 
C16 C15 C14 119.8(3) . . ? 
C15 C16 C11 118.1(3) . . ? 
C21 C20 C25 115.98(18) . . ? 
C21 C20 P1 111.71(17) . . ? 
C25 C20 P1 115.05(15) . . ? 
C20 C21 C22 109.0(2) . . ? 
C23 C22 C21 111.7(2) . . ? 
C24 C23 C22 113.5(2) . . ? 
N2 C24 C23 108.6(2) . . ? 
N2 C25 N1 116.6(2) . . ? 
N2 C25 C20 124.3(2) . . ? 
N1 C25 C20 119.1(2) . . ? 
C27 C26 N2 112.7(2) . . ? 
C26 C27 C28 107.5(2) . . ? 
C27 C28 N1 108.0(3) . . ? 
C36 C31 C32 119.9(2) . . ? 
C36 C31 P1 117.5(2) . . ? 
C32 C31 P1 122.5(2) . . ? 
C33 C32 C31 120.2(3) . . ? 
C32 C33 C34 118.8(4) . . ? 
C33 C34 C35 120.7(3) . . ? 
C36 C35 C34 121.4(3) . . ? 
C31 C36 C35 119.0(3) . . ? 
C25 N1 C28 124.4(2) . . ? 
C25 N2 C24 118.2(2) . . ? 
C25 N2 C26 124.6(2) . . ? 
C24 N2 C26 116.68(19) . . ? 
F3 B1 F4 108.1(3) . . ? 
F3 B1 F2 104.3(3) . . ? 
F4 B1 F2 111.1(3) . . ? 
F3 B1 F1 110.7(2) . . ? 
F4 B1 F1 109.3(3) . . ? 
F2 B1 F1 113.1(2) . . ? 
F7 B2 F8 106.1(3) . . ? 
F7 B2 F6 106.2(3) . . ? 
F8 B2 F6 113.2(2) . . ? 
F7 B2 F5 111.6(2) . . ? 
F8 B2 F5 106.5(3) . . ? 
F6 B2 F5 113.1(3) . . ? 
  
loop_ 
 _geom_hbond_atom_site_label_D 
 _geom_hbond_atom_site_label_H 
 _geom_hbond_atom_site_label_A 
 _geom_hbond_distance_DH 
 _geom_hbond_distance_HA 
 _geom_hbond_distance_DA 
 _geom_hbond_angle_DHA 
 _geom_hbond_site_symmetry_A 
N1 H1 F3  0.877(18) 2.00(2) 2.789(3) 150(4) 34:5 
  
_diffrn_measured_fraction_theta_max    0.987 
_diffrn_reflns_theta_full              38.58 
_diffrn_measured_fraction_theta_full   0.987 
_refine_diff_density_max    2.730 
_refine_diff_density_min   -2.531 
_refine_diff_density_rms    0.141 
